# Supplementary material for: Uric acid to HDL cholesterol ratio as a novel predictor of carotid intima-media thickness: a cross-sectional study in rural China
Source: PeerJ. 2025 Sep 19;13:e20053. doi: 10.7717/peerj.20053 (PMC12452943; doi:10.7717/peerj.20053)
Supplement: Supplemental Information 4 [file peerj-13-20053-s004.xlsx]

## Sheet: UHR与CIMT库
Sex	Age	Age group	Hypertension	Diabetic	Smoking	Drinking	Height	Weight	BMI	BMI group	SBP	DBP	Differential pulse pressure	GLU	TC	TG	HDL	LDL	Scr	BUN	SUA	LIMT	RIMT	Average value	Group
0	92	2	1	0	0	0	146.5	59.6	27.7697	1	233.5	110	123.5	5.39	3.92	0.61	1.44	2.14	69.3	6.2	304	0.599	0.745	672	0
1	91	2	1	0	0	1	149	49.2	22.1612	0	161.5	75.5	86	5	5.05	0.75	1.65	3.1	49.2	5.5	154	0.8	0.71	755	0
0	90	2	1	0	1	1	167	64.4	23.0915	0	150	97	53	4.2	4.83	1	1.75	2.75	73.8	4.5	211	0.89	1.06	975	1
0	89	2	1	0	1	1	#NULL!	#NULL!	#NULL!	#NULL!	158	69	89	5.68	5.09	0.83	1.67	3.01	130.7	6	376	0.79	0.88	835	0
1	89	2	1	0	1	0	#NULL!	#NULL!	#NULL!	#NULL!	#NULL!	#NULL!	#NULL!	4.66	5.17	1.08	1.4	3.33	74.6	6.1	331	0.886	0.98	933	0
0	89	2	1	1	1	0	171.5	108.3	36.8214	2	148	85.5	62.5	5.18	4.68	1.37	1.01	3.01	81.7	8.3	231	0.695	0.658	676.5	0
0	88	2	1	0	1	1	158	57.9	23.1934	0	#NULL!	#NULL!	#NULL!	6.32	5.79	1.18	1.83	3.52	103.8	7.3	575	1.13	1.06	1095	1
0	88	2	1	0	1	1	157	64.6	26.208	1	158	80	78	5.29	5.08	0.99	1.7	3.09	74.9	6.4	426	1.23	0.89	1060	1
0	88	2	1	0	1	0	158	43.3	17.345	0	159	81	78	4.71	5.16	1.41	1.39	3.5	85.3	8.6	470	0.97	0.71	840	0
0	88	2	0	0	1	1	153	46.5	19.8642	0	137.5	72	65.5	5.21	3.85	0.71	1.57	2.03	78.9	4.8	246	0.64	0.54	590	0
1	88	2	1	0	0	0	145	44.9	21.3555	0	154	63.5	90.5	6.31	4.69	2.64	0.8	2.69	81.7	4.5	230	0.81	0.89	850	0
1	88	2	1	0	0	0	151	43.7	19.1658	0	#NULL!	#NULL!	#NULL!	5.21	5.93	0.95	2.06	3.47	93.7	8.7	382	0.8	0.8	800	0
1	88	2	0	1	0	0	145	46.7	22.2117	0	138.5	60	78.5	6.77	6.04	0.79	1.51	4.19	66	6.3	300	0.79	0.92	855	0
1	88	2	1	1	0	0	152	49.4	21.3816	0	158	73	85	7.85	5.19	2.37	1.06	3.29	63.7	4.9	289	0.75	0.8	775	0
1	88	2	0	1	0	0	152.5	44.8	19.2636	0	133.5	65.5	68	6.85	5.63	1.21	1.65	3.67	80.8	5.7	298	0.732	0.796	764	0
0	87	2	1	0	1	0	171.5	80.8	27.4715	1	145.5	86	59.5	6.03	5.05	1.31	1.14	3.3	92	4.9	332	0.71	0.97	840	0
0	87	2	0	0	1	0	164	59.7	22.1966	0	131	72	59	4.64	3.29	0.65	0.98	1.9	402.9	16.2	347	0.71	0.81	760	0
1	87	2	1	0	0	0	143.5	53.9	26.1749	1	157.5	88.5	69	5.84	5.5	2	1.11	3.6	58.7	4.4	276	0.71	0.71	710	0
0	86	2	1	0	1	1	169.5	72.4	25.1999	1	151	84.5	66.5	6.49	5.15	2.06	0.94	3.35	86.8	5.2	237	0.89	0.75	820	0
0	86	2	1	0	1	1	164	61.6	22.903	0	149	83	66	5.28	4.61	0.77	1.45	2.85	125.2	11.5	457	0.88	0.73	805	0
1	86	2	1	0	0	0	149	60.5	27.251	1	175	91	84	5.89	6.77	0.79	1.7	4.74	65.5	7.5	400	0.916	0.753	834.5	0
0	85	2	1	0	1	1	165	62.6	22.9936	0	162	97.5	64.5	4.61	3.82	0.52	1.17	2.33	96.8	6.4	251	0.88	0.97	925	0
0	85	2	1	0	1	0	#NULL!	#NULL!	#NULL!	#NULL!	149.5	72.5	77	4.9	5.26	2.48	1	3.4	140.6	10.7	455	0.9	0.902	901	0
0	85	2	1	0	1	1	160.5	56.4	21.8942	0	165	65	100	5.18	4.28	0.85	1.3	2.5	129.7	6.5	454	0.989	0.819	904	0
0	85	2	1	0	1	1	169.5	66.3	23.0767	0	151.5	78.5	73	5.94	5.48	0.97	1.53	3.56	90.4	7.1	432	0.62	0.71	665	0
0	85	2	0	0	0	1	167	68.9	24.7051	1	122	71.5	50.5	4.87	4.53	2.66	0.96	2.56	114.9	6.8	490	0.71	0.89	800	0
1	85	2	1	0	0	0	147	47	21.7502	0	206	80.5	125.5	4.92	5.67	1.03	1.58	3.8	86.2	7	374	0.97	1	985	0
1	85	2	1	0	0	0	146	40.5	18.9998	0	185.5	70.5	115	6.54	4.48	1.01	1.59	2.64	77.5	5.6	315	0.62	0.81	715	0
1	85	2	1	0	0	0	#NULL!	#NULL!	#NULL!	#NULL!	144	71.5	72.5	5.35	5.45	3.08	1	3.25	61.5	4.9	359	0.79	0.62	705	0
1	85	2	0	0	0	1	155.5	71.4	29.5282	2	123	72	51	6.53	5.81	1.12	1.98	2.38	55.5	6.2	188	0.62	0.44	530	0
0	84	2	1	0	1	1	171.5	74.6	25.3636	1	203.5	104	99.5	5.61	5.63	0.61	2.09	3.45	58.3	3	342	0.941	0.936	938.5	0
0	84	2	1	0	1	1	162.5	59.5	22.5325	0	163.5	78.5	85	5.42	4.8	0.62	1.51	3.09	89.8	5.9	329	0.815	0.804	809.5	0
0	84	2	0	0	1	1	162.5	60.3	22.8355	0	117	68.5	48.5	4.53	5.62	1.4	1.71	3.34	75.2	5	311	0.767	0.748	757.5	0
0	84	2	1	0	1	1	#NULL!	#NULL!	#NULL!	#NULL!	#NULL!	#NULL!	#NULL!	4.89	5.19	0.8	1.71	3.2	90.5	6.5	421	0.79	0.71	750	0
0	84	2	1	0	1	1	156.5	59.8	24.4159	1	177.5	62.5	115	4.9	4.67	0.61	1.39	3.1	84.3	4.6	402	0.857	0.658	757.5	0
1	84	2	1	0	0	0	144.5	52	24.9039	1	141	69	72	5.29	4.94	0.85	2.26	2.47	83.4	5.5	342	1.23	1.06	1145	1
1	84	2	1	0	0	0	142	48.1	23.8544	0	153.5	84	69.5	5.58	6.35	1.81	1.45	4.37	87.5	6.4	259	0.835	0.981	908	0
1	84	2	1	1	0	0	153	55.9	23.8797	0	206.5	75	131.5	7.36	5.06	1.34	1.04	3.47	57.9	3.4	255	1.077	0.924	1000.5	1
1	84	2	1	1	0	0	147.5	45.8	21.0514	0	147.5	91	56.5	7.91	3.71	0.96	1	2.17	72.6	6.1	368	0.996	0.747	871.5	0
0	83	2	1	0	1	1	160.5	64.3	24.9609	1	156	85.5	70.5	6.92	7.85	1.6	1.54	5.77	76.6	4.9	357	0.948	1.077	1012.5	1
0	83	2	0	0	1	1	165.5	63.5	23.1834	0	127.5	68.5	59	5.87	6.17	0.79	1.55	4.48	99.8	8.5	404	0.71	0.87	790	0
0	83	2	1	0	1	0	166.5	60.3	21.7515	0	150	75.5	74.5	5.36	4.36	1.05	1.27	2.69	87.5	7.5	267	0.89	0.71	800	0
0	83	2	1	0	1	0	156	62.4	25.641	1	208	95.5	112.5	6.66	4.27	1.4	1.02	2.67	75.7	4.3	288	0.81	0.71	760	0
0	83	2	1	0	1	1	168.5	86.6	30.5013	2	168.5	96.5	72	6.05	6.65	2.1	1.28	4.81	135.2	9.3	689	0.766	0.549	657.5	0
1	83	2	1	0	1	0	140	59.6	30.4082	2	178.5	108.5	70	5.31	5.32	1.37	1.14	3.67	81.3	7.5	344	0.707	0.638	672.5	0
0	83	2	1	1	1	1	171.5	91	30.9395	2	215.5	97.5	118	8.47	5.29	1.41	0.97	3.62	78.2	4.8	364	1.149	1.063	1106	1
0	83	2	1	1	0	1	169	63.1	22.0931	0	157.5	85	72.5	7.05	5.35	1.04	1.45	3.68	71.7	4.5	297	0.89	0.88	885	0
1	83	2	1	1	0	0	151	55.9	24.5165	1	134.5	71.5	63	7.14	5.85	5.62	0.98	2.57	131.4	7.6	485	0.88	0.8	840	0
1	83	2	1	1	0	0	150	57.7	25.6444	1	175.5	90.5	85	7.48	7.69	1.59	2.3	5.23	52.9	5	198	0.73	0.71	720	0
0	82	2	1	0	1	1	167.5	79.8	28.4429	2	169.5	90.5	79	5.26	5.35	0.8	1.6	3.44	81.8	4.8	355	1.15	1.06	1105	1
0	82	2	1	0	1	1	167	67.6	24.2389	1	177.5	79.5	98	5.48	5.11	0.86	1.76	2.96	83.4	5.5	276	1.158	0.601	879.5	1
0	82	2	0	0	1	1	164	61.3	22.7915	0	#NULL!	#NULL!	#NULL!	5.81	4.44	1.49	1.33	2.59	99	5.3	420	0.949	0.865	907	0
0	82	2	1	0	1	0	168.5	65.7	23.1401	0	165	86	79	4.99	12.71	8.43	1.23	5.82	111.7	8.1	460	0.97	0.8	885	0
0	82	2	1	0	1	1	166	73.1	26.5278	1	189	76.5	112.5	5.81	4.26	1.53	1.27	2.16	84.9	3.6	356	0.71	0.71	710	0
0	82	2	1	0	1	1	163.5	67.5	25.2504	1	174	95	79	4.68	3.89	1.13	1.33	1.95	96.9	6	409	0.538	0.533	535.5	0
1	82	2	1	0	1	1	146.5	40.5	18.8703	0	127	62	65	5.9	7.04	1.26	1.74	4.79	70.5	4.4	263	1.02	0.62	820	1
0	82	2	1	1	1	1	#NULL!	#NULL!	#NULL!	#NULL!	157	106.5	50.5	6.08	3.33	0.95	1.09	1.69	139.4	9.6	419	0.531	0.502	516.5	0
0	82	2	1	0	0	1	159	64.6	25.5528	1	160.5	77.5	83	5.44	3.93	1.49	0.71	2.43	82.1	3.2	467	0.733	0.802	767.5	0
1	82	2	1	0	0	0	152	54.1	23.4159	0	148.5	80.5	68	6.96	4.76	1.29	1.77	2.4	69.7	3.4	288	0.71	1.06	885	1
1	82	2	1	0	0	0	#NULL!	#NULL!	#NULL!	#NULL!	179.5	61.5	118	4.64	5.95	1.14	1.45	3.89	71.4	4.4	276	1.01	0.91	960	1
1	82	2	1	0	0	0	157.5	56.2	22.6556	0	176.5	80	96.5	5.05	5.38	0.84	1.91	3.08	79.7	6	367	0.62	0.88	750	0
1	82	2	1	0	0	0	156.5	57.3	23.3952	0	156	100	56	6.46	6.27	1.23	2.33	3.65	69.3	5.4	290	0.901	0.761	831	0
1	82	2	1	0	0	0	155.5	41.7	17.2455	0	154.5	72	82.5	5.21	5.19	0.85	2.19	2.66	46.8	5.4	165	0.9	0.71	805	0
1	82	2	1	0	0	0	148.5	80.2	36.3682	2	171	81	90	5.53	5.68	2.11	1.13	3.72	74.6	4.9	360	0.446	0.39	418	0
0	82	2	1	1	0	1	165	65	23.8751	0	133	88	45	6.14	5.8	1.45	1.35	4.02	120.4	8.4	417	0.79	0.71	750	0
1	82	2	1	1	0	0	160.5	58.6	22.7482	0	169.5	77	92.5	9.01	4.91	1.44	1.69	2.56	55.7	6.4	227	0.88	0.79	835	0
1	82	2	1	1	0	0	139.5	45.4	23.3296	0	199	90	109	7.06	5.42	1	2.13	3.21	61.5	5.6	345	0.849	0.753	801	0
1	82	2	1	1	0	0	147.5	53.8	24.7285	1	171	85	86	8.77	5.13	1.86	1.18	3.44	55.7	5.2	304	0.75	0.55	650	0
0	81	2	1	0	1	1	162.5	72.8	27.5692	1	175.5	82	93.5	5.5	4.18	1.31	1.9	1.79	105.9	6.1	296	0.88	0.97	925	0
0	81	2	1	0	1	1	154.5	75	31.4199	2	160	83	77	5.4	5.2	1.32	1.13	3.65	74.9	5.1	439	0.62	0.88	750	0
0	81	2	1	0	1	1	165	63.1	23.1772	0	154.5	82.5	72	5.7	4.92	0.88	1.7	2.93	72.4	4.4	378	0.806	0.822	814	0
0	81	2	1	0	1	1	157.5	59.1	23.8246	0	183	88	95	6.04	5.54	1.43	1.54	3.52	84.2	5.6	318	0.95	0.82	885	0
0	81	2	0	0	1	0	152.5	44.4	19.0916	0	138.5	74.5	64	5.22	5.52	1.6	1.61	3.28	102.1	5.1	340	0.79	0.73	760	0
0	81	2	1	0	1	1	164.5	72.8	26.9029	1	180	99	81	5.52	4.34	0.9	1.14	2.73	85.6	4.3	251	0.888	0.728	808	0
0	81	2	1	0	1	0	162	72.4	27.5873	1	141	77	64	5.75	3.72	1.05	1.17	1.98	116.8	5.8	313	0.79	0.71	750	0
0	81	2	0	0	1	1	#NULL!	#NULL!	#NULL!	#NULL!	137	77	60	4.7	4.42	1.04	1.5	2.47	109.1	6.1	503	0.735	0.691	713	0
0	81	2	1	0	1	0	152.5	59.2	25.4555	1	157	86	71	5.4	4.61	1.26	1.32	2.81	69.2	6.3	311	0.71	0.62	665	0
0	81	2	1	1	1	1	160.5	55.5	21.5448	0	141	81	60	11.86	4.84	0.66	1.5	3.05	69.1	5.3	182	0.88	0.97	925	0
0	81	2	1	0	0	0	164.5	66.3	24.5009	1	163	75.5	87.5	5.22	3.8	0.96	1.57	1.88	114.6	7	346	0.79	1.06	925	1
0	81	2	0	0	0	0	159	47.4	18.7493	0	132.5	74.5	58	5.7	4.98	0.76	1.74	3	77.9	4.2	369	0.861	0.617	739	0
1	81	2	1	0	0	0	156.5	57.2	23.3543	0	153	73.5	79.5	5.24	5.13	0.71	1.55	3.47	51.3	4.4	154	0.89	0.89	890	0
1	81	2	1	0	0	0	160	56.6	22.1094	0	144.5	71.5	73	4.56	6.2	1.93	1.17	4.05	56.5	7.4	235	0.8	0.88	840	0
1	81	2	1	0	0	0	163.5	56.5	21.1355	0	148	83	65	5.74	7.26	1.37	1.43	5.47	65	7	211	0.855	0.827	841	0
1	81	2	1	0	0	0	156.5	55	22.4561	0	151.5	83.5	68	5.26	5.58	1	1.51	3.63	61.1	3.3	252	0.811	0.812	811.5	0
1	81	2	1	0	0	0	148	48.8	22.279	0	176.5	79.5	97	4.95	5.68	0.81	2.45	3.05	81.7	7.8	298	0.81	0.802	806	0
1	81	2	1	0	0	0	150.5	60.1	26.5339	1	152.5	83	69.5	6.92	4.49	2.33	1.01	2.44	70.7	8.8	521	0.71	0.79	750	0
1	81	2	1	0	0	0	147	59.6	27.5811	1	156.5	76	80.5	4.9	5.42	0.75	2.01	3.22	75.2	7	347	0.73	0.71	720	0
1	81	2	1	0	0	0	145.5	56.4	26.6412	1	167	86.5	80.5	5.61	4.54	1.56	1.17	2.6	78.9	3.3	214	0.741	0.688	714.5	0
1	81	2	1	0	0	0	128	34.9	21.3013	0	174.5	92	82.5	5.47	4.39	0.72	1.98	3.08	48.4	4.1	145	0.686	0.663	674.5	0
1	81	2	1	0	0	0	159	71.5	28.2821	2	178.5	92	86.5	4.63	5.66	0.75	1.58	3.67	66.6	6.4	268	0.97	0.63	800	0
1	81	2	1	0	0	0	147	55.6	25.73	1	207	91	116	5.67	4.9	1.67	1.15	3.02	70.7	5.9	286	0.79	0.62	705	0
1	81	2	1	0	0	0	134.5	43.7	24.1567	1	181.5	92	89.5	5.3	4.68	0.67	1.85	2.74	66	4.7	230	0.71	0.62	665	0
1	81	2	1	1	0	0	147.5	58.1	26.705	1	152	86.5	65.5	7.48	5.41	3.17	0.9	3.03	76.7	6.2	313	0.693	0.882	787.5	0
1	81	2	1	1	0	0	149	68.9	31.0346	2	160	81	79	7.51	5.04	0.91	1.34	3.19	55.8	4.5	312	0.62	0.8	710	0
0	80	2	1	0	1	1	166	61.9	22.4633	0	153	65.5	87.5	4.77	4.27	0.76	1.56	2.29	125.6	7.6	333	0.972	1.075	1023.5	1
0	80	2	1	0	1	1	170	70.4	24.3599	1	172	92	80	5.73	4.85	1.15	0.97	3.54	106.2	6.4	540	0.974	1.06	1017	1
0	80	2	1	0	1	0	165.5	65	23.7311	0	134	76	58	5.16	5.06	1.25	1.13	3.37	117.8	7.9	434	0.8	1.06	930	1
0	80	2	1	0	1	1	163.3	72.2	27.0748	1	159.5	67	92.5	4.65	5.16	1.47	1.05	3.5	96.2	7.1	561	1.075	1.049	1062	1
0	80	2	1	0	1	1	159	56.3	22.2697	0	172	89	83	5.04	5.08	0.62	1.62	3.15	94	5.9	215	0.933	1.038	985.5	1
0	80	2	1	0	1	1	#NULL!	#NULL!	#NULL!	#NULL!	#NULL!	#NULL!	#NULL!	6.09	5.42	0.97	2.13	2.91	70.9	3.6	314	1.06	0.99	1025	1
0	80	2	1	0	1	1	160.5	71.5	27.7559	1	150	86	64	5.29	5.32	1.21	1.19	3.73	94.5	5.9	321	0.81	0.92	865	0
0	80	2	1	0	1	1	163	72.5	27.2874	1	157.5	79.5	78	6.94	5.84	1.74	1.91	3.48	78.8	7.1	470	0.81	0.9	855	0
0	80	2	0	0	1	0	153.5	52.5	22.2814	0	137	72.5	64.5	5.17	4.56	1.9	1.3	2.73	89.9	5.9	229	0.9	0.89	895	0
0	80	2	1	0	1	1	152.5	60	25.7995	1	180	71	109	6.29	4.59	1.01	1.29	2.85	77.7	5.8	261	0.755	0.84	797.5	0
0	80	2	1	0	1	1	172	65.3	22.0727	0	195.5	93	102.5	5.62	4.18	0.79	1.52	2.34	81.9	4.5	257	0.676	0.799	737.5	0
0	80	2	1	0	1	0	159.5	52.3	20.558	0	156.5	92	64.5	4.93	3.9	0.89	1.12	2.32	80.8	5.8	217	0.846	0.786	816	0
0	80	2	1	0	1	0	165.5	76.1	27.7836	1	147.5	81	66.5	5.34	4.97	1.34	1.52	2.88	57	3.8	197	0.99	0.71	850	0
0	80	2	0	0	1	1	165	69.7	25.6015	1	131.5	72	59.5	4.78	5.95	1.93	0.86	4.07	93.3	4.9	356	0.757	0.658	707.5	0
1	80	2	1	0	1	0	137	44.8	23.8691	0	169.5	78	91.5	4.83	4.7	2.89	1	2.57	66.5	4	333	0.715	0.662	688.5	0
1	80	2	0	0	1	1	145.5	53.1	25.0824	1	125	65.5	59.5	4.27	4.76	1.57	1.29	2.83	91.3	9.5	385	0.71	0.53	620	0
0	80	2	1	0	0	0	166	75.9	27.5439	1	163.5	87	76.5	4.93	4.83	2.49	0.98	2.79	86.2	5.6	299	0.893	0.898	895.5	0
0	80	2	1	0	0	0	159	54.9	21.7159	0	170.5	100.5	70	4.51	3.89	0.5	1.08	2.48	76.9	6.2	210	0.45	0.54	495	0
1	80	2	1	0	0	0	150	52.8	23.4667	0	175	86	89	5.32	5.43	1.86	1.85	2.79	63.6	7.4	383	0.889	0.868	878.5	0
1	80	2	1	0	0	0	143	58.8	28.7545	2	159.5	75.5	84	5.41	4.78	2.79	0.83	2.78	59.9	5.4	319	0.935	0.697	816	0
0	79	2	1	0	1	0	163.5	58.9	22.0333	0	144.5	77.5	67	5.09	4.71	0.59	1.87	2.59	77.2	4.7	361	0.951	0.903	927	0
0	79	2	1	0	1	1	162	54.8	20.881	0	154.5	83.5	71	4.41	5.74	1.28	1.3	4.05	65.7	3.3	276	0.899	0.883	891	0
0	79	2	1	0	1	0	165.5	59.3	21.65	0	141	81	60	4.54	4.66	0.71	1.85	2.5	87.2	5.7	306	0.81	0.88	845	0
0	79	2	1	0	1	1	169.5	78	27.1491	1	173.5	83.5	90	5.48	5.69	2.04	1.02	4.1	106.8	4.4	342	0.83	0.858	844	0
0	79	2	1	0	1	0	162.5	74.2	28.0994	2	173.5	95.5	78	5.89	5.03	0.7	1.77	2.98	78.5	5.8	364	0.743	0.821	782	0
0	79	2	1	0	1	1	170	97.2	33.6332	2	168	103	65	5.18	5.28	1.41	1.46	3.58	119.7	8.1	602	0.64	0.794	717	0
0	79	2	1	0	1	1	165	73.6	27.034	1	150	72	78	5.64	5.2	1.28	1.25	3.41	85.3	8	419	0.53	0.73	630	0
0	79	2	1	0	1	1	158	55.9	22.3922	0	179	86	93	5.16	5.65	1.08	1.65	3.45	79.8	3.7	291	0.81	0.71	760	0
1	79	2	1	0	1	0	152	52.1	22.5502	0	163	78.5	84.5	5.83	5.2	1.4	1.5	2.7	65.8	5.6	237	0.731	0.77	750.5	0
0	79	2	1	1	1	0	164.5	67.3	24.8704	1	165.5	81	84.5	7.18	5.41	0.96	1.41	3.66	92.3	7.4	304	0.81	1.4	1105	1
0	79	2	1	1	1	1	170.5	73	25.1116	1	142	97	45	7.8	3.41	1.35	1.25	1.62	80.8	4.9	223	1.15	1.25	1200	1
0	79	2	1	1	1	1	164	50.7	18.8504	0	151.5	90	61.5	9.77	5.31	1.5	1.27	3.47	79.8	6.2	265	0.54	0.71	625	0
0	79	2	1	0	0	0	164	55	20.4491	0	#NULL!	#NULL!	#NULL!	4.25	4.88	1.01	1.21	3.46	96.9	5.1	366	0.88	0.88	880	0
1	79	2	1	0	0	0	135.5	41.5	22.6032	0	157	77.5	79.5	5.51	6.44	0.69	2.34	3.88	60	8.3	195	1.1	0.71	905	1
1	79	2	0	0	0	0	153.5	47.9	20.3291	0	134	68	66	5.36	4.82	1.02	2.22	2.12	58.6	4.9	207	0.71	0.8	755	0
1	79	2	1	0	0	0	156	53.4	21.9428	0	161.5	75	86.5	5.87	5.17	1.35	1.32	3.2	68.7	6.8	315	0.713	0.652	682.5	0
0	78	2	1	0	1	1	164	67.3	25.0223	1	186	97	89	4.59	5.12	0.91	1.47	3.25	94.2	4.8	326	0.832	1.073	952.5	1
0	78	2	1	0	1	0	164	86.4	32.1237	2	151.5	74	77.5	4.18	5.6	1.26	1.19	3.9	100.7	12.4	542	1.111	1.019	1065	1
0	78	2	1	0	1	1	169.5	73.3	25.5132	1	154.5	86.5	68	5.57	4.77	1.09	0.95	3.45	98.4	7.6	290	1.06	0.95	1005	1
0	78	2	1	0	1	1	#NULL!	#NULL!	#NULL!	#NULL!	150	65	85	6.24	6.35	0.71	1.84	4.2	79.5	4.8	420	0.88	0.97	925	0
0	78	2	1	0	1	1	160	62.5	24.4141	1	163	84	79	5.31	4.55	1.59	1.23	2.63	81.4	3.8	143	0.974	0.883	928.5	0
0	78	2	0	0	1	0	152.5	63.3	27.2185	1	122	63	59	4.95	4.78	1.22	0.85	3.36	79.1	4.4	315	0.89	0.84	865	0
0	78	2	1	0	1	1	162.5	61.2	23.1763	0	187	101	86	5.02	5.97	0.88	2.59	3.09	64.7	6.2	264	0.92	0.79	855	0
0	78	2	1	0	1	1	164.5	69.2	25.5726	1	160	80	80	4.9	3.43	1.03	1	1.95	71.9	4.4	196	0.82	0.71	765	0
0	78	2	1	0	1	1	175	75.1	24.5224	1	197	82	115	4.96	4.86	1.15	1.18	3.19	120.7	9.3	414	0.73	0.71	720	0
0	78	2	1	0	1	1	167	70.2	25.1712	1	157	81.5	75.5	5.06	6.13	0.56	2.42	3.64	88.3	7.7	419	0.73	0.71	720	0
0	78	2	1	0	1	1	166.6	60.9	21.9415	0	207.5	91	116.5	5	4.8	0.74	1.76	2.7	64.7	4	227	0.73	0.62	675	0
1	78	2	0	0	1	0	153.5	50.2	21.3053	0	123.5	79	44.5	4.86	4.07	1.33	0.94	2.49	59.2	2.9	198	0.768	0.952	860	0
1	78	2	1	0	1	0	146.5	38.6	17.9851	0	141.5	61	80.5	5.08	4.96	0.84	1.43	3.07	48.7	6	186	0.93	0.62	775	0
0	78	2	1	1	1	1	162	63	24.0055	1	177.5	90	87.5	5.3	4.29	0.91	1.27	2.74	86.9	7.6	353	0.8	1.07	935	1
0	78	2	1	1	1	1	167	84.2	30.1911	2	177.5	83.5	94	7.71	4.65	1.26	1.13	2.9	99.1	6.6	424	1.162	0.886	1024	1
0	78	2	1	1	1	0	172	64.7	21.8699	0	176	66.5	109.5	5.94	4.38	1.32	1.47	2.37	85.9	6.9	309	1.141	0.811	976	1
0	78	2	0	1	1	1	147	52.8	24.4343	1	130.5	89.5	41	16.34	4.51	0.66	2.13	2.35	51.2	6.3	169	0.866	0.981	923.5	0
0	78	2	0	1	1	1	157	58.5	23.7332	0	128	81	47	8.57	4.62	0.83	1.26	3.09	60.8	8.8	218	0.53	0.53	530	0
1	78	2	1	1	1	0	149.5	45.1	20.1787	0	147	63	84	8.49	4.37	1	1.52	2.52	81.3	5	294	1.13	1.34	1235	1
0	78	2	1	0	0	1	161	57.6	22.2214	0	204	106.5	97.5	5.5	5.25	1.23	1.43	3.32	62.1	5.3	328	0.822	0.979	900.5	0
0	78	2	1	0	0	1	158.5	66.9	26.6298	1	140.5	75.5	65	5.23	3.83	0.44	1.32	2.29	98.6	5.8	539	0.681	0.85	765.5	0
1	78	2	1	0	0	0	156	63.4	26.0519	1	152.5	70.5	82	4.36	5.35	1.13	1.42	3.56	63.1	5	214	0.824	1.175	999.5	1
1	78	2	1	0	0	0	151	57.3	25.1305	1	180.5	91.5	89	5.58	5.73	1.33	1.41	4.03	62.4	4.7	361	0.79	0.81	800	0
1	78	2	1	0	0	0	159	57	22.5466	0	193.5	79.5	114	6.09	5.42	2.74	1.51	3.04	89.8	6	436	0.75	0.8	775	0
1	78	2	1	0	0	0	152	56.7	24.5412	1	145	87	58	5.87	5.03	1.45	1.25	3.28	63.7	4.2	354	0.548	0.722	635	0
1	78	2	1	0	0	0	137	45.1	24.029	1	148	74	74	4.92	5.18	0.81	1.18	3.63	49.6	3.6	179	0.54	0.66	600	0
1	78	2	1	0	0	0	150	52.9	23.5111	0	162	82	80	5.71	7.77	3.7	1.14	5.15	69.4	7.6	364	0.54	0.62	580	0
1	78	2	1	0	0	0	155	51.2	21.3111	0	165.5	86.5	79	6.25	4.75	0.73	1.55	2.95	54.5	4.9	242	0.71	0.57	640	0
0	78	2	1	1	0	0	156.5	54.3	22.1703	0	166	80	86	7.43	4.61	1.82	0.94	3	69.8	5.1	514	0.896	0.916	906	0
1	78	2	1	1	0	0	155	63.4	26.3892	1	151	69	82	12.76	5.66	2.76	1.16	3.45	88.5	6.8	380	0.719	0.815	767	0
1	78	2	1	1	0	0	#NULL!	#NULL!	#NULL!	#NULL!	150	78	72	9.41	6.7	2.41	0.79	5.12	70.2	4.5	316	0.71	0.79	750	0
1	78	2	1	1	0	0	155.5	61.6	25.4753	1	151	77.5	73.5	7.3	5.33	0.93	1.75	3.2	61.3	6.9	150	0.753	0.744	748.5	0
0	77	2	1	0	1	1	167.5	59.6	21.243	0	146	69	77	4.38	5.22	1.93	1.38	2.83	62.3	7.6	287	0.79	1.06	925	1
0	77	2	1	0	1	1	165	68	24.977	1	187	88.5	98.5	4.81	5.24	1.11	1.25	3.35	72.6	5	315	1.12	0.66	890	1
0	77	2	1	0	1	1	166	67.7	24.5682	1	171	93.5	77.5	5.08	4.91	1.38	1.33	3.03	81.3	4.1	249	0.62	0.89	755	0
0	77	2	1	0	1	1	162.5	51.1	19.3515	0	165	86	79	4.79	4.05	0.73	1.47	2.29	85.8	7.4	316	0.86	0.86	860	0
0	77	2	1	0	1	0	168.8	61.5	21.5839	0	150	86	64	4.63	5.19	0.64	2.12	2.85	114.3	8.5	466	0.67	0.827	748.5	0
0	77	2	1	0	1	1	159.5	66.6	26.179	1	164	74	90	6.11	3.97	0.78	1.34	2.23	82.5	7.4	251	0.686	0.806	746	0
0	77	2	1	0	1	1	164.5	77.9	28.7876	2	148	97.5	50.5	5.82	5.17	1.06	1.6	3.22	86.6	7.2	294	0.759	0.801	780	0
0	77	2	1	0	1	0	155.5	55.8	23.0767	0	168	87	81	4.79	5.55	1.49	1.3	3.66	72.6	3.4	310	0.62	0.79	705	0
0	77	2	1	0	1	1	165	46.6	17.1166	0	146.5	72	74.5	5.51	4.67	0.79	2	2.44	96.5	7.6	365	0.743	0.731	737	0
0	77	2	1	0	1	0	171	54.3	18.5698	0	143	82	61	5.62	6.42	0.75	2.34	4.09	84.2	8.2	319	0.746	0.72	733	0
0	77	2	0	0	1	1	169	66.6	23.3185	0	116.5	81.5	35	5.01	4.62	0.74	1.7	2.72	70.5	3.9	366	0.813	0.658	735.5	0
0	77	2	0	0	1	1	162	68.5	26.1012	1	127.5	74	53.5	5.93	5.84	1.04	2.07	3.78	83.7	6.5	176	0.704	0.647	675.5	0
0	77	2	1	0	1	1	166.5	61.1	22.0401	0	157	71	86	4.83	5.04	0.53	1.16	3.64	86.3	6.8	341	0.757	0.646	701.5	0
0	77	2	1	0	1	1	165	51.5	18.9164	0	152.5	83	69.5	5.29	4.93	1.3	1.54	2.73	80.7	7.4	321	0.62	0.61	615	0
0	77	2	1	0	1	0	156.5	62.4	25.4774	1	146	76	70	4.9	4.84	0.6	1.85	2.81	61.1	5.4	242	0.52	0.602	561	0
0	77	2	1	0	1	1	156.5	55.3	22.5786	0	144.5	83	61.5	5.45	4.67	0.66	1.74	2.73	60.8	6.9	273	0.583	0.586	584.5	0
1	77	2	1	0	1	0	154.5	64.4	26.9792	1	140.5	67.5	73	5.41	5.71	1.95	1.12	3.8	57.1	3.7	335	0.774	0.865	819.5	0
1	77	2	1	0	1	0	152	63.9	27.6575	1	148	74.5	73.5	5.84	4.48	1.02	1.48	3.54	64.5	3.4	258	0.53	0.7	615	0
0	77	2	1	1	1	0	142.5	67.7	33.3395	2	150.5	79	71.5	5.91	4.16	0.93	1.18	2.46	61.9	4.8	109	1.19	0.75	970	1
0	77	2	1	0	0	1	155	67.8	28.2206	2	147	81.5	65.5	5.32	6.68	1.39	1.44	4.92	89.7	6.3	370	0.522	0.91	716	0
1	77	2	1	0	0	0	160	71.3	27.8516	1	141	82	59	6.22	4.33	1.16	1.51	2.72	62.4	3.7	283	0.706	0.991	848.5	0
1	77	2	1	0	0	0	148	54.7	24.9726	1	141.5	59.5	82	5.36	5.54	0.92	1.91	3.42	73.3	11	379	0.79	0.88	835	0
1	77	2	1	0	0	0	157	66.5	26.9788	1	186	85.5	100.5	5.66	5.27	1.1	1.64	3.37	79.7	5.9	377	0.8	0.81	805	0
1	77	2	1	0	0	0	143.5	46.9	22.7756	0	168.5	82.5	86	5.61	5.56	1.23	1.55	4.68	60.4	4	208	0.787	0.79	788.5	0
1	77	2	1	0	0	0	156	57.8	23.7508	0	189	102.5	86.5	6.51	5.22	1.3	1.36	3.34	52.1	5.7	244	0.71	0.79	750	0
1	77	2	1	0	0	0	152.5	52.6	22.6176	0	158.5	77.5	81	6.39	6.11	1.61	1.51	3.99	59.9	3.9	321	0.713	0.758	735.5	0
1	77	2	1	1	0	0	136	59.5	32.1691	2	145.5	68.5	77	7.75	6.44	1.04	1.9	4.39	59.7	8.3	218	0.62	1.1	860	1
1	77	2	0	1	0	0	161	68.3	26.3493	1	127.5	61.5	66	7.11	5.32	2.07	0.98	3.39	86.5	6	259	0.71	0.79	750	0
1	77	2	1	1	0	0	148.5	55.7	25.2582	1	163.5	91	72.5	7.58	5.47	2.24	1.14	3.39	62.5	5.5	499	0.8	0.62	710	0
0	76	2	1	0	1	1	160.5	59.8	23.2141	0	130.5	79.5	51	5.17	5.99	0.89	1.85	3.93	81.2	6.3	272	0.97	1.03	1000	1
0	76	2	1	0	1	1	155	56.6	23.5588	0	142	70.5	71.5	5.07	4.06	0.8	1.27	2.44	77.1	6.3	316	1.172	0.882	1027	1
0	76	2	1	0	1	1	165.5	79.1	28.8789	2	157	91	66	5.56	5.44	1.89	1.24	3.33	83.4	5.1	435	1.025	0.881	953	1
0	76	2	1	0	1	1	165.5	54.9	20.0436	0	162.5	87.5	75	5.15	7.06	1.86	1.23	5.14	110.8	6.3	359	0.79	0.99	890	0
0	76	2	1	0	1	1	164.5	73.8	27.2725	1	145	78	67	5.85	4.62	0.65	1.49	2.77	74.9	6	309	0.71	0.92	815	0
0	76	2	1	0	1	1	172	69.3	23.4248	0	143	90	53	5.37	5.43	0.69	1.91	3.25	77.6	7.7	274	0.827	0.905	866	0
0	76	2	1	0	1	1	158	58.7	23.5139	0	147.5	74.5	73	5.51	4.58	1.1	1.44	2.62	71.7	5.5	297	0.62	0.89	755	0
0	76	2	1	0	1	1	170	64.2	22.2145	0	160.5	88	72.5	5.64	4.84	0.89	1.15	3.58	72.3	6.9	261	0.98	0.87	925	0
0	76	2	1	0	1	1	166.5	63.9	23.0501	0	144	73.5	70.5	5.14	4.21	1.11	1.1	2.51	103.6	9.8	315	0.924	0.852	888	0
0	76	2	1	0	1	1	162.5	59.6	22.5704	0	157.5	73	84.5	5.6	4.82	1.77	1.17	2.82	78	3.2	495	0.759	0.829	794	0
0	76	2	1	0	1	1	164	69.6	25.8775	1	144	75	69	5.09	4.94	0.95	1.35	3.09	79	4.1	328	0.785	0.816	800.5	0
0	76	2	1	0	1	1	159	71.9	28.4403	2	160	79	81	5.57	5.59	1.61	1.54	3.66	98.7	6.8	527	0.73	0.79	760	0
0	76	2	1	0	1	0	158.5	56.3	22.4104	0	178	81	97	5.5	5.1	0.78	1.4	3.3	116.8	6.1	379	0.97	0.77	870	0
0	76	2	1	0	1	0	162	53.7	20.4618	0	142	91	51	4.35	5.51	0.62	1.95	3.47	78.6	6.1	328	0.73	0.75	740	0
0	76	2	1	0	1	1	158	52.7	21.1104	0	152	93	59	5.14	4.46	0.72	1.81	2.39	70.7	6.4	217	0.56	0.53	545	0
1	76	2	1	0	1	1	150	65.8	29.2444	2	186	92	94	5.43	6.01	2.46	1.05	3.92	57.5	4.5	326	1.1	0.97	1035	1
1	76	2	1	0	1	1	150	64.8	28.8	2	161.5	87	74.5	4.77	6.36	1.26	1.65	4.21	67.3	6.1	220	0.762	0.949	855.5	0
1	76	2	1	0	1	0	158	65.8	26.358	1	179.5	80	99.5	5.71	5.38	2.33	1.13	3.29	75.1	3.8	398	0.62	0.62	620	0
0	76	2	1	1	1	1	165.5	71.3	26.0312	1	184.5	93	91.5	10.1	4.07	2.1	0.62	2.44	109.1	5.7	409	0.71	0.8	755	0
0	76	2	1	0	0	0	156.5	60.9	24.865	1	163.5	83.5	80	5.49	3.93	1.06	1.06	2.39	113.9	7.5	356	0.62	0.81	715	0
0	76	2	1	0	0	0	152	50.9	22.0308	0	146	67.5	78.5	5.46	4.27	0.67	1.38	2.49	62.9	5.9	329	0.71	0.71	710	0
0	76	2	1	0	0	0	175.5	89.1	28.9283	2	181	88	93	5.68	5.27	1.52	1.2	3.36	85.5	4.3	374	0.8	0.62	710	0
1	76	2	1	0	0	0	156.5	53.6	21.8845	0	191	88	103	5.21	6.4	1.43	1.39	4.53	61.4	4.8	257	1.59	1.16	1375	1
1	76	2	1	0	0	0	146	52.5	24.6294	1	216	106.5	109.5	5.74	6.02	2.04	0.87	4.12	76.9	5.4	380	0.987	1.136	1061.5	1
1	76	2	0	0	0	0	149.5	56.7	25.3688	1	139	73	66	5.28	4.73	2.49	0.99	2.87	72.2	5.1	358	1.06	0.8	930	1
1	76	2	1	0	0	0	153	57	24.3496	1	127	66.5	60.5	3.73	4.47	0.7	1.29	2.8	56.2	4.6	197	0.793	0.975	884	0
1	76	2	1	0	0	0	#NULL!	#NULL!	#NULL!	#NULL!	177.5	85.5	92	5.26	5.56	1.78	1.46	3.46	58.3	4.5	205	0.79	0.97	880	0
1	76	2	0	0	0	0	160	53.1	20.7422	0	126	77.5	48.5	5.23	5.39	0.88	2.1	3.06	73.3	7.5	207	0.87	0.879	874.5	0
1	76	2	1	0	0	0	146	39.3	18.4369	0	148.5	77.5	71	5.08	5.13	1.06	1.62	3.27	71.7	4.6	297	0.781	0.863	822	0
1	76	2	1	0	0	1	150.5	72.5	32.0085	2	143	80	63	4.88	6.81	2.51	1.29	4.6	60.4	5.3	285	0.73	0.828	779	0
1	76	2	0	0	0	0	146	54.3	25.4738	1	126	71	55	5.08	4.01	1.1	1.26	2.36	70.2	4.1	258	0.91	0.8	855	0
1	76	2	1	0	0	0	152.5	47.5	20.4246	0	191	95.5	95.5	5	6.28	1.55	1.56	4.08	86.7	5.8	251	0.8	0.8	800	0
1	76	2	0	0	0	0	139.5	43.9	22.5588	0	133	72	61	5.14	4.99	1.36	1.99	2.6	66.6	6.7	241	0.8	0.8	800	0
1	76	2	1	0	0	0	145.5	50.4	23.807	0	139.5	71.5	68	5.08	4.74	0.74	1.43	3.1	79.5	8.6	295	0.664	0.748	706	0
1	76	2	1	0	0	0	147	42.5	19.6677	0	166.5	85	81.5	5.18	5.76	0.79	2.28	3.21	65.7	7	241	0.856	0.731	793.5	0
1	76	2	1	0	0	0	142	52.4	25.9869	1	187.5	98.5	89	5.33	5.95	0.98	1.7	4.01	51.5	3.8	213	0.9	0.73	815	0
1	76	2	1	0	0	0	152	44.7	19.3473	0	154	71	83	5.73	5.02	1.18	1.57	3.05	60.2	7.1	288	0.54	0.71	625	0
1	76	2	1	0	0	0	155	65.6	27.3049	1	153	79	74	5.65	5.62	1.61	1.38	3.5	63.6	6.3	237	0.8	0.62	710	0
1	76	2	1	0	0	0	141	50.3	25.3005	1	173	89	84	5.37	3.88	0.81	1.21	2.15	61	5.4	252	0.73	0.62	675	0
1	76	2	1	0	0	0	156.5	60.3	24.62	1	171.5	75	96.5	6.02	6.44	1.97	1.41	4.48	58.4	5.8	336	0.64	0.62	630	0
1	76	2	1	0	0	0	142.5	46.6	22.9486	0	154.5	69.5	85	5.31	4.37	0.89	1.22	2.71	43.9	4.1	149	0.707	0.599	653	0
1	76	2	1	1	0	0	151.5	59.7	26.0105	1	193	90	103	7.11	6.42	1.78	1.42	4.49	54.7	5.5	396	1.015	1.085	1050	1
1	76	2	1	1	0	0	152	54.1	23.4159	0	154.5	78.5	76	6.92	5.53	1.39	1.68	3.48	58.1	3.2	171	1.06	0.71	885	1
1	76	2	1	1	0	0	157	68.5	27.7902	1	156	74.5	81.5	9.76	5.54	1.94	1.1	3.8	56	5	235	0.97	0.8	885	0
1	76	2	1	1	0	0	147.5	58.4	26.8429	1	161.5	66	95.5	9.03	4.91	0.92	1.59	3.15	89.8	5.4	238	0.805	0.784	794.5	0
1	76	2	1	1	0	0	142	63.6	31.5414	2	154	74.5	79.5	4.73	4.34	0.93	1.43	2.42	55.5	5	229	0.715	0.767	741	0
1	76	2	1	1	0	0	144.5	38.6	18.4864	0	169.5	77.5	92	7.98	5.06	1.08	1.62	2.97	69.7	8.2	280	0.62	0.62	620	0
1	76	2	1	1	0	0	161	66.8	25.7706	1	182	77	105	4.87	3.65	1.17	1.08	2.04	67.7	8.5	289	0.633	0.557	595	0
0	75	2	1	0	1	0	161	64.4	24.8447	1	148.5	79	69.5	5.68	5.28	1.37	1.06	3.61	79.2	6.3	346	0.969	1.078	1023.5	1
0	75	2	1	0	1	1	171.5	63.5	21.5896	0	163.5	95	68.5	5.38	5.14	1.14	1.27	3.42	93.3	9.1	288	0.647	1.047	847	1
0	75	2	1	0	1	1	168	66.3	23.4906	0	148	81	67	6.09	4.79	0.78	1.53	3.01	76.6	7.7	267	0.904	1.007	955.5	1
0	75	2	1	0	1	1	164.5	68.5	25.3139	1	167.5	95.5	72	5.42	5.51	1.1	1.66	3.57	70.5	4.2	267	1.06	0.97	1015	1
0	75	2	1	0	1	1	170	87.8	30.3806	2	190	108	82	5.94	5.26	2.34	1.17	3.12	109.7	6.6	357	1.15	0.88	1015	1
0	75	2	0	0	1	1	140	57.6	29.3878	2	132	75	57	5	4.26	0.54	1.81	2.25	69.4	7	267	1.06	0.71	885	1
0	75	2	1	0	1	1	164	88	32.7186	2	168	86	82	4.76	5.72	2.07	1.03	3.87	94.3	4.8	423	0.862	0.916	889	0
0	75	2	1	0	1	0	168.5	78.7	27.7188	1	153	68	85	6.02	4.26	0.87	1.23	2.58	82.4	7.4	405	0.921	0.873	897	0
0	75	2	1	0	1	1	178	80.6	25.4387	1	136.5	83	53.5	5.21	5.64	0.86	1.39	3.89	78.8	5.2	327	0.816	0.809	812.5	0
0	75	2	1	0	1	1	172	53.1	17.9489	0	163	97.5	65.5	5.53	5.1	1.14	1.75	2.91	75.5	4.7	296	0.91	0.805	857.5	0
0	75	2	1	0	1	1	157	57.9	23.4898	0	159.5	77.5	82	5.49	5.26	1.23	2.01	2.84	72.4	5.3	234	0.743	0.792	767.5	0
0	75	2	1	0	1	1	158.5	79.8	31.7647	2	162.5	82.5	80	5.83	4.14	1.47	1.3	2.2	89.1	5.6	296	0.705	0.784	744.5	0
0	75	2	1	0	1	0	168	57.5	20.3727	0	140.5	83	57.5	4.77	4.29	0.73	1.59	2.38	76.2	8.7	255	0.715	0.777	746	0
0	75	2	1	0	1	0	168.5	88.9	31.3114	2	140.5	67	73.5	5.18	4.28	1.33	0.83	2.74	94.6	8.5	429	0.766	0.758	762	0
0	75	2	1	0	1	1	168.5	82.4	29.022	2	160	93	67	6	5.61	1.24	1.27	3.8	73.4	4	359	0.726	0.734	730	0
0	75	2	1	0	1	1	157.5	64	25.7999	1	140.5	86	54.5	5.6	4.22	1.46	1.13	2.44	105.5	8.6	622	0.719	0.713	716	0
0	75	2	1	0	1	1	169	75.8	26.5397	1	173.5	88.5	85	6.13	4.41	0.95	1.24	2.62	97.7	4.4	294	0.97	0.66	815	0
0	75	2	1	0	1	1	154	57.7	24.3296	1	156.5	83	73.5	5.21	4.74	1.35	1.41	2.98	74.2	8.8	152	0.79	0.64	715	0
0	75	2	1	0	1	1	175	72.5	23.6735	0	143	79	64	5.39	4.31	0.58	1.53	2.41	82.4	7.5	412	0.71	0.62	665	0
0	75	2	0	0	1	1	166.5	62.7	22.6172	0	135.5	86.5	49	4.85	4.91	0.55	1.65	2.97	93	4.6	214	0.54	0.62	580	0
0	75	2	1	0	1	1	166.5	69.4	25.034	1	143.5	84.5	59	4.23	5.11	1.21	1.65	2.79	76.3	5.5	298	0.676	0.611	643.5	0
0	75	2	1	0	1	1	163	51.8	19.4964	0	143.5	78.5	65	4.95	6.52	0.89	1.78	4.39	81.3	2.8	400	0.67	0.58	625	0
0	75	2	1	0	1	0	153	58	24.7768	1	145.5	82.5	63	5.4	4.86	0.87	1.55	2.96	80.5	8.6	289	0.62	0.44	530	0
1	75	2	1	0	1	0	#NULL!	#NULL!	#NULL!	#NULL!	140.5	93	47.5	4.95	6.62	1.51	1.32	4.61	99.1	9.5	540	0.71	0.71	710	0
0	75	2	1	1	1	1	163	75.2	28.3037	2	165.5	85	80.5	7.9	4.5	1.68	1.01	3.09	79.5	6.6	357	0.84	1.4	1120	1
0	75	2	1	1	1	1	170	92.2	31.9031	2	165	84.5	80.5	7.86	4.67	2.22	1.08	2.66	94.6	4.8	277	1.214	1.146	1180	1
0	75	2	1	1	1	1	166.5	86.5	31.2024	2	153	82	71	10.33	5.76	1.14	1.27	3.96	85.5	5.9	407	0.81	1.09	950	1
0	75	2	1	1	1	1	166.5	87.9	31.7074	2	174	97	77	7.03	6.29	2.01	1.03	4.55	78.7	5.6	263	1.03	1.089	1059.5	1
0	75	2	1	1	1	1	163	65	24.4646	1	153	63	90	8.37	3.06	0.67	1.15	1.48	73.1	7.3	191	1.136	1.054	1095	1
0	75	2	1	1	1	1	171	72.6	24.8282	1	143.5	87.5	56	7.83	4.48	1.44	0.95	2.8	71	5.4	275	0.64	0.53	585	0
0	75	2	1	0	0	1	159.5	65.5	25.7466	1	167.5	99.5	68	5.45	4.16	1.59	0.84	2.58	64	4.5	270	1.036	0.979	1007.5	1
0	75	2	0	0	0	1	165.5	53.2	19.423	0	135.5	61.5	74	5.42	5.04	0.48	2.15	2.66	71.3	6.6	218	0.742	0.89	816	0
0	75	2	1	0	0	0	161.5	58.6	22.4674	0	183.5	103	80.5	5.63	4.95	1.16	1.2	3.43	85.6	7	327	0.712	0.815	763.5	0
0	75	2	1	0	0	1	149	86.5	38.9622	2	171.5	85	86.5	6.66	4.62	1.81	0.98	2.9	80	4.5	387	0.8	0.79	795	0
0	75	2	1	0	0	1	172.5	77	25.8769	1	151	92.5	58.5	6.23	3.78	0.81	1.37	2.03	69.2	5.2	351	0.679	0.774	726.5	0
0	75	2	1	0	0	1	167.5	68.9	24.5578	1	139.5	75	64.5	4.98	4.55	2.13	0.8	2.77	123.6	6.9	557	0.79	0.71	750	0
0	75	2	1	0	0	0	160.5	73.3	28.4547	2	126	88	38	5.83	5.41	1.25	1.2	3.84	125.5	7.9	389	0.805	0.705	755	0
1	75	2	1	0	0	0	148.5	56.8	25.757	1	154.5	85.5	69	4.99	5.46	1.09	1.73	3.47	66.2	4.7	257	1.103	1.212	1157.5	1
1	75	2	1	0	0	0	157	70.1	28.4393	2	167	76	91	5.86	5.97	2.53	1.06	3.89	74.2	5.8	306	0.686	1.064	875	1
1	75	2	1	0	0	0	147.5	51.5	23.6714	0	150	88	62	4.86	4.15	1.49	1.52	2.04	61.3	5.2	259	0.62	1.02	820	1
1	75	2	1	0	0	0	149.5	52.2	23.3554	0	145.5	77	68.5	5.87	5.03	1.63	1.28	2.97	61.9	5.6	319	0.84	0.99	915	0
1	75	2	1	0	0	0	153	66.6	28.4506	2	161	92	69	5.48	6.35	1.6	1.55	4.27	84.3	7.2	293	0.843	0.944	893.5	0
1	75	2	1	0	0	0	166.5	62	22.3647	0	161	80.5	80.5	5.24	5.77	5.75	0.82	1.48	68.9	5.5	276	0.88	0.9	890	0
1	75	2	1	0	0	0	156.5	44.7	18.2507	0	147	71	76	5.38	4.97	1.15	1.43	3.05	52.9	5.6	337	0.912	0.865	888.5	0
1	75	2	1	0	0	0	144.5	48	22.9882	0	182	92	90	4.83	5.8	1.24	1.26	4.11	66.9	6.1	242	0.622	0.843	732.5	0
1	75	2	1	0	0	0	154.5	60.9	25.5129	1	170	92	78	4.9	5.11	1.08	1.28	3.65	66	3.9	201	0.54	0.82	680	0
1	75	2	1	0	0	0	149	48.8	21.981	0	154.5	86	68.5	5.16	5.63	1.53	1.37	3.73	68	5.2	282	0.8	0.8	800	0
1	75	2	1	0	0	0	159.5	62.5	24.5674	1	189	96.5	92.5	5.4	4.62	2.61	1.06	2.39	73.4	4.4	322	0.71	0.8	755	0
1	75	2	1	0	0	0	152	63.6	27.5277	1	153	81.5	71.5	5.58	4.83	1.96	1.12	3.14	57.8	6.8	232	0.764	0.793	778.5	0
1	75	2	1	0	0	0	147.5	52.2	23.9931	0	161.5	87.5	74	4.77	4.85	1.95	1.55	2.57	52	5	146	0.507	0.782	644.5	0
1	75	2	1	0	0	0	153.5	67.3	28.5626	2	193	110.5	82.5	6.2	4.62	2.75	0.98	2.4	67.6	6.5	255	0.794	0.761	777.5	0
1	75	2	1	0	0	0	147	56.9	26.3316	1	157	91	66	5.13	5.46	0.82	1.74	3.49	53.5	4.7	160	0.737	0.743	740	0
1	75	2	1	0	0	0	#NULL!	#NULL!	#NULL!	#NULL!	147.5	80	67.5	5.81	5.69	1.62	1.22	3.79	78.2	5.6	295	0.576	0.743	659.5	0
1	75	2	1	0	0	0	147	63.1	29.2008	2	184	84	100	5.7	5.16	0.55	2.61	2.38	55.5	6.2	188	0.725	0.734	729.5	0
1	75	2	1	0	0	0	155	52.4	21.8106	0	151.5	80	71.5	5.63	5.37	1.45	1.68	3.27	89.4	6.6	299	0.53	0.73	630	0
1	75	2	1	0	0	0	150.5	61.1	26.9754	1	156.5	84	72.5	5.14	5.81	1.78	0.9	4.17	62.2	5.4	272	0.547	0.723	635	0
1	75	2	1	0	0	0	145.5	64.7	30.5618	2	146.5	72	74.5	5.31	5.79	2.08	1.18	3.83	62	5.2	263	0.835	0.72	777.5	0
1	75	2	1	0	0	0	150.6	57.4	25.3082	1	184	76.5	107.5	6.55	5.34	1.04	1.87	3.25	60.2	8.5	233	0.9	0.71	805	0
1	75	2	1	0	0	0	146.5	60.2	28.0492	2	154	74.5	79.5	5.44	3.66	1.65	0.99	1.86	64.4	3.5	271	0.929	0.707	818	0
1	75	2	1	0	0	0	151	61.5	26.9725	1	154	69.5	84.5	5.53	5.68	0.99	2.18	2.21	55.4	4.9	235	0.766	0.705	735.5	0
1	75	2	1	0	0	0	148	52.8	24.1052	1	176.5	89.5	87	5.38	5.06	0.56	1.45	3.31	72.4	4.1	253	0.741	0.703	722	0
1	75	2	1	0	0	0	144.5	54.7	26.197	1	144.5	80.5	64	6.59	5.62	1.35	1.12	3.96	72.6	10	296	0.896	0.677	786.5	0
1	75	2	1	0	0	0	140	45.8	23.3673	0	189	82	107	6.12	6.02	1.28	1.72	3.79	66.6	5.8	242	0.714	0.628	671	0
1	75	2	0	0	0	0	148.5	32.6	14.7831	0	133	67	66	4.58	4.13	1.44	1.54	2.62	62.6	5.3	197	0.592	0.621	606.5	0
1	75	2	1	0	0	0	158	47.6	19.0675	0	156	68	88	5.12	4.92	0.97	1.75	2.75	59.3	5	245	0.84	0.62	730	0
1	75	2	1	0	0	0	151.5	77.8	33.8965	2	181	84	97	5.15	5.07	1.15	1.17	3.43	78	4.6	322	0.81	0.62	715	0
1	75	2	1	0	0	0	160	73.8	28.8281	2	171.5	95.5	76	6.01	6.51	2.15	1.11	4.56	76.3	4.7	249	0.59	0.62	605	0
1	75	2	1	0	0	0	147.5	53.1	24.4068	1	143	78.5	64.5	4.69	5.64	2.99	0.96	3.38	63.3	4.8	228	0.53	0.62	575	0
1	75	2	1	0	0	0	162.5	48.6	18.4047	0	142	76	66	4.13	4.95	1.21	1.27	3.32	84.2	5.2	480	0.655	0.619	637	0
1	75	2	1	0	0	0	157	60.3	24.4635	1	159	84	75	6	5.98	1.42	1.38	4.25	45.8	5	274	0.87	0.113	491.5	0
0	75	2	1	1	0	0	163	85.5	32.1804	2	148	90	58	8.56	4.4	3.6	0.9	1.91	65.2	6.7	343	0.694	0.706	700	0
0	75	2	1	1	0	1	154.5	68.9	28.8644	2	186	89	97	7.04	6.9	1.79	1.22	4.89	85.2	6.1	386	0.689	0.642	665.5	0
0	75	2	1	1	0	1	166	67.3	24.423	1	161.5	88	73.5	7.88	5.32	1.95	1.17	3.21	82.6	4.9	332	0.71	0.62	665	0
1	75	2	1	1	0	0	142	48.5	24.0528	1	191	90	101	4.88	5.19	1.07	1.4	3.41	60.4	4.7	178	0.71	1.15	930	1
1	75	2	1	1	0	0	152.5	72.7	31.2604	2	159	78	81	10.38	5.7	1.47	1.43	3.73	47.1	6	198	0.89	0.89	890	0
1	75	2	1	1	0	0	150	53.5	23.7778	0	165.5	89	76.5	8.48	4.84	1.48	1.1	2.98	67.8	4	217	0.853	0.747	800	0
1	75	2	0	1	0	0	147.5	70.3	32.3126	2	#NULL!	#NULL!	#NULL!	18.92	4.15	2.15	0.97	2.45	69.8	7.1	247	0.626	0.746	686	0
1	75	2	1	1	0	0	151	77.7	34.0775	2	175	77.5	97.5	10.14	5.39	2.38	1.06	3.52	53.9	4.7	222	0.65	0.719	684.5	0
1	75	2	1	1	0	0	148	56.1	25.6118	1	179	75	104	8.65	6.1	1.44	1.41	2.92	57.3	7.2	84	0.755	0.71	732.5	0
1	75	2	1	1	0	0	143	49.7	24.3044	1	152.5	77	75.5	5.15	5.56	1	2.03	3.18	57	5.7	205	0.54	0.71	625	0
1	75	2	1	1	0	0	160.5	75.8	29.4252	2	#NULL!	#NULL!	#NULL!	5.87	5.91	2.41	1.05	4.16	155.4	11.9	368	0.53	0.71	620	0
1	75	2	1	1	0	0	153.5	56.2	23.8517	0	187.5	93	94.5	11.99	4.21	0.99	1.42	2.34	62.8	4.4	224	0.62	0.56	590	0
1	75	2	1	1	0	0	156	77.3	31.7636	2	171.5	87.5	84	5.53	4.66	1.11	1.53	3.2	61.3	6.9	150	0.53	0.44	485	0
0	74	2	0	0	1	0	#NULL!	#NULL!	#NULL!	#NULL!	#NULL!	#NULL!	#NULL!	5.42	4.32	0.94	0.91	3.18	73.1	5.2	432	0.904	1.066	985	1
0	74	2	0	0	1	1	164.5	73	26.9768	1	137	75	62	5.29	3.94	1.87	0.85	2.26	75.5	3.9	315	1.06	0.99	1025	1
0	74	2	1	0	1	1	162	66.6	25.3772	1	167.5	80.5	87	5.27	5.84	2.06	1.26	3.41	72.3	5.1	177	0.776	0.996	886	0
0	74	2	1	0	1	1	170.5	68.6	23.598	0	166	91	75	5.82	4.8	1.41	1.09	3.15	67.1	4.1	373	0.842	0.908	875	0
0	74	2	1	0	1	1	151.5	73.9	32.1973	2	175	93	82	5.16	3.98	2.05	1.01	2.12	86.8	4.8	286	0.906	0.861	883.5	0
0	74	2	1	0	1	1	169	66.3	23.2135	0	192	102.5	89.5	4.66	5.59	1.03	3.13	2.23	82.7	6.7	384	0.769	0.859	814	0
0	74	2	1	0	1	1	163	64.8	24.3893	1	144.5	71.5	73	5.24	4.82	0.77	1.52	2.96	105.5	10.2	488	0.795	0.852	823.5	0
0	74	2	1	0	1	1	152.9	58.9	25.1942	1	146.5	96	50.5	5.21	4.83	1.5	1.13	2.89	74.6	5.1	311	0.71	0.81	760	0
0	74	2	1	0	1	1	170.5	76.9	26.4532	1	135.5	85	50.5	6.03	5.69	2.18	0.99	3.78	80.4	6.1	541	0.88	0.79	835	0
0	74	2	1	0	1	1	157	59.7	24.22	1	154	84	70	5.42	4.43	1.2	0.98	2.94	68.6	4.2	296	0.64	0.79	715	0
0	74	2	1	0	1	1	166	63	22.8625	0	133.5	88	45.5	5.81	4.45	0.59	1.84	2.57	73.4	6.3	251	0.97	0.71	840	0
0	74	2	0	0	1	1	164.5	51.8	19.1425	0	139	80	59	5.4	4.28	1.12	1.83	2.17	84	8.2	246	0.8	0.71	755	0
0	74	2	1	0	1	1	150	54.8	24.3556	1	170	77	93	6.46	4.87	0.75	1.35	3.16	89.1	8.1	235	0.8	0.71	755	0
0	74	2	0	0	1	1	164.5	56.4	20.8424	0	116.5	71.5	45	5.3	3.58	0.61	1.19	1.96	77.2	4.5	277	0.691	0.71	700.5	0
0	74	2	1	0	1	1	172	75.6	25.5544	1	144.5	74	70.5	6.86	5.54	1.36	0.88	4.11	72	5.8	309	0.62	0.71	665	0
0	74	2	1	0	1	1	159	63.5	25.1177	1	153.5	90.5	63	4.83	3.73	0.73	1.54	1.86	80.7	5.6	202	0.7	0.673	686.5	0
0	74	2	1	0	1	1	158	68.7	27.5196	1	141	85	56	5.95	5.48	1.03	1.74	3.64	79.8	6.1	419	0.656	0.669	662.5	0
0	74	2	1	0	1	1	156	51.9	21.3264	0	171	84	87	5.98	5.01	1.34	1.42	3.03	71.1	5.1	262	0.774	0.659	716.5	0
0	74	2	0	0	1	0	165.5	55	20.0801	0	137	75	62	5.51	5.09	0.55	1.74	3.1	77.9	7.1	304	0.634	0.657	645.5	0
0	74	2	1	0	1	1	160.5	62.5	24.2622	1	149	77.5	71.5	5.32	4.45	1.2	1.29	2.66	57.9	5.9	263	0.9	0.62	760	0
0	74	2	1	0	1	0	152.5	53.8	23.1336	0	151	90	61	6.72	5.38	1.27	1.6	3.27	75.6	4.6	238	0.8	0.62	710	0
0	74	2	1	0	1	1	169	78.5	27.485	1	156	82.5	73.5	5.91	3.88	0.68	1.32	2.17	92	5.9	338	0.54	0.62	580	0
0	74	2	1	0	1	1	167	76.7	27.5019	1	153.5	78.5	75	5.77	4.89	1.64	2	2.38	93.5	5.5	490	0.74	0.586	663	0
0	74	2	1	0	1	1	168.5	82.5	29.0572	2	184.5	99.5	85	5.15	5.15	1.85	0.99	3.4	81.1	2.8	404	0.601	0.547	574	0
0	74	2	1	0	1	1	162	62.2	23.7007	0	163	75	88	6.03	4.26	0.69	1.7	2.45	80.5	6.8	273	0.8	0.54	670	0
1	74	2	1	0	1	0	151	59.1	25.9199	1	172.5	88	84.5	5.07	4.61	1	1.69	2.64	45.8	4.2	230	0.763	0.887	825	0
1	74	2	1	0	1	1	158.5	58.7	23.3657	0	162	89	73	5.13	6.38	1.63	1.91	4.18	58.9	5.3	286	0.562	0.744	653	0
1	74	2	1	0	1	0	160.5	54.5	21.1566	0	169.5	78.5	91	6.77	5.82	1.49	1.19	4.06	83	5	379	0.753	0.73	741.5	0
0	74	2	1	1	1	1	169	79.1	27.6951	1	204	81	123	8.54	4.49	2.77	0.84	2.72	85.5	6.2	310	0.8	0.97	885	0
0	74	2	0	1	1	1	160	47	18.3594	0	124	97.5	26.5	6.34	5.42	0.81	1.74	3.26	72.9	3.9	259	0.802	0.924	863	0
0	74	2	1	1	1	0	154	66.1	27.8715	1	148.5	72.5	76	15.87	3.96	3.22	0.63	2.11	79.7	6.3	263	0.81	0.827	818.5	0
0	74	2	0	1	1	1	155	53.5	22.2685	0	#NULL!	#NULL!	#NULL!	8.16	3.92	1.32	0.87	2.39	94.6	4.5	299	0.824	0.741	782.5	0
1	74	2	1	1	1	1	153	54.7	23.3671	0	147	91	56	7.22	4.87	2.5	1.3	2.67	87	5.5	356	1.06	0.97	1015	1
1	74	2	1	1	1	0	159	58.2	23.0212	0	155	77	78	6.2	4.67	0.56	2.11	2.41	74.5	7.5	286	0.751	0.871	811	0
0	74	2	1	0	0	0	159.5	65.1	25.5894	1	191	105	86	5.6	5.12	0.66	1.94	3	76.4	7.2	206	1.26	1.06	1160	1
0	74	2	0	0	0	0	150.5	60.6	26.7547	1	122	66	56	6.18	4.1	0.98	1.05	2.54	75.5	8	248	0.88	1.06	970	1
0	74	2	1	0	0	1	167	75.9	27.215	1	142.5	81	61.5	5.21	5.78	1.94	1.64	3.68	91.1	5.9	397	0.8	0.77	785	0
0	74	2	1	0	0	1	173.5	81.2	26.9747	1	156.5	82	74.5	6.44	3.19	1.18	1.09	1.54	89.1	6	243	0.62	0.75	685	0
0	74	2	1	0	0	1	175.5	70.2	22.792	0	151	103	48	6.31	5.78	1.14	1.77	3.53	76	3.9	273	0.71	0.71	710	0
0	74	2	1	0	0	1	166	61	22.1367	0	167	100.5	66.5	4.39	4.1	0.48	2	1.98	75.7	7.5	237	0.81	0.64	725	0
0	74	2	1	0	0	1	160	68.4	26.7187	1	147.5	82.5	65	4.72	6.83	1	1.58	4.78	116.8	7.7	350	0.71	0.62	665	0
0	74	2	1	0	0	0	174	64.5	21.304	0	152.5	74.5	78	5.64	3.44	0.48	1.83	1.59	82.1	6	329	0.62	0.62	620	0
0	74	2	1	0	0	1	171.5	61.5	20.9097	0	143	87.5	55.5	4.82	3.98	0.51	1.49	2.22	82.7	7.3	457	0.44	0.44	440	0
1	74	2	1	0	0	0	#NULL!	#NULL!	#NULL!	#NULL!	#NULL!	#NULL!	#NULL!	5.19	5.84	2.31	1.57	3.5	57.1	3	231	0.86	1.19	1025	1
1	74	2	1	0	0	0	154.5	59	24.717	1	165	84	81	6.1	5.72	0.94	1.64	3.99	76	9.5	280	0.844	1.024	934	1
1	74	2	1	0	0	0	157.5	57	22.9781	0	167.5	78	89.5	5.7	5.61	1.09	2.01	3.08	48.4	4.1	145	0.749	0.983	866	0
1	74	2	1	0	0	0	143.5	55.7	27.049	1	168.5	93	75.5	5.44	5.36	3.75	0.96	2.84	97.5	8.1	592	0.62	0.89	755	0
1	74	2	0	0	0	0	150.5	52.1	23.002	0	136	58	78	5.44	5.33	1.28	1.1	3.78	79.2	7	341	0.618	0.805	711.5	0
1	74	2	1	0	0	0	152.5	56.3	24.2085	1	176.5	77.5	99	6.13	4.87	2.83	0.82	2.94	71.6	5.4	626	0.809	0.803	806	0
1	74	2	0	0	0	0	152	54.6	23.6323	0	129.5	74	55.5	5.1	6.53	1.96	1.18	4.58	51.2	4.4	231	0.705	0.775	740	0
1	74	2	1	0	0	0	146	47.6	22.3306	0	157.5	79	78.5	4.55	5.85	1.89	1.49	3.65	70.2	7.2	337	0.73	0.77	750	0
1	74	2	1	0	0	0	159.5	63.2	24.8425	1	155	90	65	4.58	4.64	1.79	1.2	2.68	79.4	5.6	418	0.679	0.744	711.5	0
1	74	2	1	0	0	0	148.5	58.4	26.4826	1	168	77	91	5.65	5.21	2.44	1.03	3.2	53.9	4.1	229	0.71	0.71	710	0
1	74	2	1	0	0	0	156	58.9	24.2028	1	171.5	85.5	86	5.12	3.76	0.51	1.73	3.92	57.5	4.5	326	0.722	0.698	710	0
1	74	2	1	0	0	0	148	58	26.4792	1	143.5	85.5	58	5.57	5	1.48	1.2	3.27	69.5	8	271	0.571	0.694	632.5	0
1	74	2	1	0	0	0	146.5	50	23.2967	0	129.5	72	57.5	5.78	4.2	1.54	1.31	2.24	57.6	4.4	174	0.72	0.686	703	0
1	74	2	0	0	0	0	154	59.1	24.9199	1	132.5	66.5	66	4.59	5.4	0.58	2.02	3.27	81.6	5.9	266	0.47	0.667	568.5	0
1	74	2	1	0	0	0	143.5	61.5	29.8656	2	171	89.5	81.5	5	4.22	2.1	0.86	2.29	75.9	4.9	463	0.56	0.64	600	0
1	74	2	1	0	0	0	159	89.9	35.5603	2	143	78	65	6.51	3.9	1.58	1.56	1.71	53.5	4	367	0.6	0.53	565	0
1	74	2	1	0	0	0	157.5	63.5	25.5984	1	139.5	92	47.5	4.7	4.81	1.98	1.05	2.9	86.2	6.1	354	0.44	0.53	485	0
0	74	2	1	1	0	1	135	58.9	32.3182	2	157	78	79	7.52	5.57	0.7	2.34	3.06	67.3	4.4	263	0.756	0.761	758.5	0
0	74	2	1	1	0	0	154.5	56.8	23.7953	0	145	80.5	64.5	5.18	4	0.63	1.65	1.98	164.6	10.3	430	0.53	0.71	620	0
0	74	2	1	1	0	0	165.5	75.5	27.5646	1	138	77	61	8.9	4.1	0.57	1.31	2.41	82.4	5.5	273	0.739	0.642	690.5	0
1	74	2	1	1	0	0	152	65.6	28.3934	2	182.5	77.5	105	8.42	5.65	1.05	2.26	3.36	82.3	7.4	278	1.002	0.827	914.5	0
1	74	2	1	1	0	0	158	68.8	27.5597	1	167	82	85	7.59	4.21	1.87	0.94	2.56	57.1	3.2	245	0.724	0.799	761.5	0
1	74	2	1	1	0	0	145.5	47.8	22.5789	0	156.5	83.5	73	9.26	4.17	2.38	0.85	2.4	56.6	4	287	0.728	0.769	748.5	0
1	74	2	1	1	0	0	143	72.6	35.503	2	152	82	70	7.08	5.22	0.86	1.89	2.84	58.1	4.1	202	0.46	0.73	595	0
1	74	2	1	1	0	1	153.5	72.1	30.5998	2	145.5	68.5	77	5.98	4.32	2.44	1.12	2.37	86.3	4.9	438	0.62	0.71	665	0
1	74	2	1	1	0	0	147	60.3	27.905	1	191.5	97.5	94	7.06	4.11	1.04	1.43	2.22	80.1	5.2	314	0.503	0.665	584	0
0	73	2	1	0	1	1	161	57.5	22.1828	0	165.5	90	75.5	4.7	5.35	1.1	2.01	2.96	85.6	4.6	414	0.88	1.35	1115	1
0	73	2	1	0	1	0	166.5	83.5	30.1202	2	162	95	67	6.06	5.64	5.55	0.77	2.57	122.9	8.1	398	0.615	1.066	840.5	1
0	73	2	1	0	1	1	165.5	75.9	27.7106	1	158	77	81	4.75	5.64	0.74	1.14	4.23	113.5	5	422	1.13	1.06	1095	1
0	73	2	1	0	1	1	163.5	66.3	24.8015	1	172	94	78	5.2	4.67	0.85	1.43	2.86	68	6.3	246	0.79	1.03	910	1
0	73	2	1	0	1	1	160.5	60.3	23.4082	0	182.5	97	85.5	5.16	3.82	0.74	1.33	2.11	84.6	7.1	274	0.92	0.984	952	0
0	73	2	0	0	1	1	169.5	83.5	29.0634	2	137	79	58	4.52	5.47	1.51	1.21	3.53	94.6	5.7	431	0.938	0.982	960	0
0	73	2	1	0	1	1	159	55.3	21.8741	0	159.5	100.5	59	5.21	5.09	0.86	1.82	2.96	61.5	7.6	532	0.62	0.97	795	0
0	73	2	1	0	1	0	166	81	29.3947	2	167	100	67	5.25	5.21	1.4	1.17	3.5	86.7	7.9	422	0.665	0.884	774.5	0
0	73	2	1	0	1	1	161.5	59.9	22.9658	0	143	85.5	57.5	5.47	4.27	0.59	1.53	2.41	94.2	7.3	364	0.62	0.88	750	0
0	73	2	1	0	1	0	170	62.9	21.7647	0	157.5	90	67.5	5	4.13	0.96	0.97	2.56	109.4	7.9	399	0.997	0.863	930	0
0	73	2	1	0	1	1	164.5	61.7	22.801	0	147.5	74	73.5	4.52	5.24	0.76	1.41	3.54	92.4	6.5	445	0.823	0.826	824.5	0
0	73	2	1	0	1	1	162.5	73.6	27.8722	1	140	85	55	6.15	5.95	1.81	1.47	3.76	89.5	5.5	499	0.62	0.81	715	0
0	73	2	1	0	1	1	164	86.5	32.1609	2	171.5	93.5	78	4.42	5.69	1.02	1.32	3.99	107.3	6.2	330	0.71	0.8	755	0
0	73	2	1	0	1	1	168.5	69.4	24.4433	1	155	74	81	5.77	3.3	0.96	0.95	1.8	75.9	4.4	375	0.71	0.79	750	0
0	73	2	1	0	1	1	167	62.8	22.5178	0	148.5	79	69.5	5.12	3.99	0.43	1.94	1.9	74	8.8	257	0.708	0.765	736.5	0
0	73	2	1	0	1	1	176.5	85.2	27.3495	1	166	82	84	6.34	5.14	2.54	1.29	2.83	91.1	4.8	387	0.914	0.738	826	0
0	73	2	1	0	1	1	164	67.3	25.0223	1	163	83	80	6.68	4.08	1.49	1.22	2.35	74.4	6.2	153	0.73	0.73	730	0
0	73	2	1	0	1	1	159.5	58.2	22.8771	0	165.5	79.5	86	5.24	4.02	1.44	1.5	1.88	82.1	4.1	259	0.71	0.73	720	0
0	73	2	1	0	1	1	166	68.7	24.931	1	140	81.5	58.5	5.38	4.89	0.84	1.48	3.11	70.7	6.5	340	0.776	0.725	750.5	0
0	73	2	1	0	1	1	163	65.3	24.5775	1	140	87	53	5.38	6.48	1.18	1.25	4.75	86.6	3.4	309	0.566	0.717	641.5	0
0	73	2	1	0	1	1	188	84.5	23.9079	0	184	94	90	5.27	6.15	1.4	1.83	3.75	87.5	5.6	244	0.89	0.71	800	0
0	73	2	0	0	1	1	165	72.8	26.7401	1	136	79.5	56.5	5.09	4.43	0.58	1.5	2.64	89.4	6.7	381	0.88	0.71	795	0
0	73	2	1	0	1	1	166	66.3	24.0601	1	174.5	87.5	87	4.71	5.07	1.26	1.26	3.42	78.3	5.7	441	0.8	0.71	755	0
0	73	2	1	0	1	0	165	65	23.8751	0	158.5	89.5	69	5.24	4.57	1.59	1.25	2.96	105.5	10.2	488	0.733	0.671	702	0
0	73	2	1	0	1	1	158.5	61.5	24.4803	1	153.5	90	63.5	5.73	3.74	0.74	0.9	2.41	76.3	4	318	0.71	0.62	665	0
0	73	2	1	0	1	1	167	66.6	23.8804	0	165	88	77	5.32	5.11	2.46	1.69	2.41	76	6.9	176	0.53	0.53	530	0
1	73	2	1	0	1	0	159	51.2	20.2524	0	142	66	76	5.34	5.32	0.95	1.58	3.37	62.3	3.9	304	0.79	0.88	835	0
1	73	2	0	0	1	0	154	63.8	26.9017	1	130	75.5	54.5	5.53	5.78	1.64	1.43	3.88	73.1	5.7	296	0.701	0.832	766.5	0
0	73	2	1	1	1	1	173.5	75	24.9151	1	140	77	63	7.97	5.13	1.76	1.19	3.36	91.9	7.8	268	0.59	1.01	800	1
0	73	2	0	1	1	0	164	69.9	25.989	1	136.5	81	55.5	9.09	5.18	1.64	1.09	3.5	92.3	4.7	403	0.78	0.97	875	0
0	73	2	1	1	1	1	162	78	29.7211	2	154.5	80.5	74	5.99	3.09	2.58	0.78	1.14	105.5	5.5	272	0.8	0.89	845	0
0	73	2	1	1	1	1	171	98.7	33.754	2	157.5	76.5	81	7.72	4.2	1.15	1.14	2.69	149.4	7.6	503	0.82	0.77	795	0
0	73	2	1	1	1	1	154	63.4	26.733	1	140.5	83	57.5	7.45	4.99	3.23	0.84	2.78	91.7	4.6	495	0.71	0.53	620	0
1	73	2	1	1	1	0	154.5	65.9	27.6076	1	150	86	64	7.92	8.33	2.08	1.34	6.27	61.5	6.4	237	0.71	0.89	800	0
0	73	2	1	0	0	0	159.5	60.7	23.8598	0	174	75	99	5.89	5.13	0.96	1.71	2.98	67.4	4.3	250	1.324	1.073	1198.5	1
0	73	2	1	0	0	0	164.5	52.9	19.549	0	149	81.5	67.5	4.93	4.51	0.69	1.35	2.53	60.4	5.8	196	1.05	0.84	945	1
0	73	2	1	0	0	1	168	67.6	23.9512	0	148	85.5	62.5	5.7	5.33	1.05	1.09	3.87	85.6	4.9	350	0.88	0.89	885	0
0	73	2	1	0	0	0	161	59.5	22.9544	0	170	91	79	5.37	4.51	0.56	1.87	2.44	81.4	5.1	347	0.926	0.872	899	0
0	73	2	1	0	0	0	159.5	74.7	29.3629	2	165	75	90	6.1	6.46	1.64	1.37	4.48	69.5	4	355	0.681	0.863	772	0
0	73	2	1	0	0	0	167	49.8	17.8565	0	155	84	71	4.72	4.76	0.66	1.72	2.77	62.6	5.6	243	0.968	0.802	885	0
0	73	2	1	0	0	0	155.5	82.4	34.0774	2	182.5	108.5	74	5.12	4.5	0.94	1.08	2.98	84.2	5.3	293	0.71	0.8	755	0
0	73	2	0	0	0	0	161.5	64.9	24.8828	1	114	80	34	5.17	5.68	0.88	1.45	3.94	99.1	5.9	372	0.71	0.71	710	0
0	73	2	1	0	0	0	175	79.3	25.8939	1	140.5	84	56.5	5.38	4.29	1.35	1.15	2.59	79.5	4.2	381	0.558	0.565	561.5	0
0	73	2	1	0	0	1	166.5	69.6	25.1062	1	150	89	61	5.75	4.82	0.7	1.4	3.07	83.9	8.2	413	0.79	0.53	660	0
0	73	2	1	0	0	1	161.5	63.5	24.3461	1	196.5	96	100.5	4.93	4.22	1.23	1.39	2.22	71.4	7.2	285	0.62	0.53	575	0
1	73	2	1	0	0	1	149.5	50.3	22.5053	0	161.5	70	91.5	4.93	5.45	1.56	1.56	3.34	51.6	6.2	204	1.15	0.97	1060	1
1	73	2	1	0	0	0	152	50.9	22.0308	0	181	95.5	85.5	5.09	5.46	1.12	1.57	3.25	47.3	5	384	1.1	0.882	991	1
1	73	2	1	0	0	0	158	53.5	21.4309	0	148	66	82	4.83	5.65	2.53	1.42	3.08	80	5.3	202	1.15	0.88	1015	1
1	73	2	1	0	0	0	147	57	26.3779	1	136	80	56	6.41	4.5	3.23	0.8	2.56	44.1	4.6	303	0.66	0.93	795	0
1	73	2	1	0	0	0	150	69	30.6667	2	143.5	65.5	78	5.71	4.83	1.81	1.13	3.11	64.2	5.7	332	0.71	0.9	805	0
1	73	2	1	0	0	1	159	60.2	23.8123	0	160.5	88	72.5	5.73	5.48	5.35	0.9	2.63	79	3.1	301	0.84	0.89	865	0
1	73	2	0	0	0	1	155.5	64.8	26.7987	1	136	70.5	65.5	6.51	6.08	2.33	1.55	3.68	65.8	5.4	365	0.793	0.871	832	0
1	73	2	1	0	0	0	155	44.8	18.6472	0	142	76	66	4.74	5	1.15	1.2	3.42	55.2	5.5	316	0.85	0.85	850	0
1	73	2	1	0	0	0	161	66	25.462	1	198	101	97	6.31	5.81	3.17	1.28	3.29	71.3	7.4	360	0.8	0.84	820	0
1	73	2	1	0	0	0	148	52.9	24.1508	1	181	79	102	5.42	5.06	0.92	1.72	2.99	68.9	4.4	268	0.547	0.819	683	0
1	73	2	0	0	0	0	150.5	47.4	20.9269	0	132	73	59	5.18	4.52	0.9	1.47	2.73	82.2	4.5	282	0.75	0.81	780	0
1	73	2	1	0	0	0	144	52.4	25.2701	1	148	80	68	4.7	4.94	0.72	2.13	2.61	54.5	6.4	187	0.608	0.793	700.5	0
1	73	2	0	0	0	0	138.5	55	28.6723	2	128	76	52	5.72	5.31	1.51	1.39	3.42	65.8	3.6	264	0.9	0.79	845	0
1	73	2	1	0	0	0	144	54.6	26.331	1	148	74	74	4.93	6.23	2.57	1.13	4.04	55.4	3.6	243	0.865	0.779	822	0
1	73	2	1	0	0	0	147	53.2	24.6194	1	158	79.5	78.5	5.03	4.84	1.98	1.38	2.79	68.7	5.8	284	0.54	0.73	635	0
1	73	2	1	0	0	0	149	59.7	26.8907	1	158	87	71	5.58	5.39	2.52	1.56	2.64	75.9	8.1	182	0.679	0.726	702.5	0
1	73	2	1	0	0	0	157.5	67.6	27.2512	1	169.5	71	98.5	5.51	5.26	1.1	1.25	3.5	87.6	5.5	363	0.83	0.72	775	0
1	73	2	1	0	0	0	160.5	59.7	23.1752	0	150	91.5	58.5	4.91	4.67	1.24	1.38	2.68	72.9	6.2	289	0.794	0.712	753	0
1	73	2	1	0	0	0	156.5	59.3	24.2117	1	166	96.5	69.5	5.93	6.82	0.94	1.84	4.81	68.6	3.8	280	0.79	0.71	750	0
1	73	2	1	0	0	0	152.5	63.8	27.4335	1	140	71	69	6.91	7.14	1.48	1.58	5.08	51.3	6.3	220	0.715	0.708	711.5	0
1	73	2	1	0	0	1	149	56	25.2241	1	144	83.5	60.5	5.95	6.3	1.21	1.94	4.13	58.3	5.4	275	0.724	0.663	693.5	0
1	73	2	1	0	0	0	161	74.2	28.6254	2	173	99.5	73.5	5.65	6	2.95	1.18	3.85	66.6	3.2	357	0.71	0.62	665	0
1	73	2	1	0	0	0	149.5	48.3	21.6105	0	156	87	69	6.1	4.68	2.41	1.02	2.84	72.4	5.4	349	0.63	0.62	625	0
1	73	2	1	0	0	0	161.5	66.7	25.5729	1	147.5	89	58.5	5.35	5.46	1.46	1.45	3.61	60.2	5	298	0.663	0.586	624.5	0
1	73	2	0	0	0	0	154.5	61.4	25.7224	1	117	69	48	5.34	4.52	0.65	1.31	3.06	63.9	5.1	298	0.705	0.584	644.5	0
1	73	2	1	0	0	0	146	70.2	32.933	2	148	78.5	69.5	5.2	5.28	1.44	1.52	3.4	61.1	6.4	292	0.71	0.56	635	0
1	73	2	1	0	0	0	152.5	65.4	28.1215	2	148	79	69	6.23	4.59	1.76	1.05	2.88	79.5	7.7	426	0.756	0.553	654.5	0
1	73	2	1	0	0	0	146	46.6	21.8615	0	161	90	71	5.63	5.13	1.03	1.71	3.14	82.8	8.3	320	0.71	0.1	405	0
0	73	2	1	1	0	1	171	74.1	25.3411	1	172	93.5	78.5	7.65	5.94	1.09	1.56	3.97	86.9	5.4	278	0.89	0.97	930	0
1	73	2	1	1	0	0	160	67.4	26.3281	1	180.5	80	100.5	6.52	6.34	1.39	1.2	4.66	87.5	5.9	316	1.25	1.16	1205	1
1	73	2	0	1	0	0	148.5	48.7	22.0839	0	136	73.5	62.5	9.46	5.4	1.05	1.26	3.69	51.5	4.2	242	1.121	0.551	836	1
1	73	2	1	1	0	0	161	71.5	27.5838	1	139.5	72	67.5	8.91	4	1.59	1.34	2.03	66.5	4.4	260	0.97	0.89	930	0
1	73	2	1	1	0	0	158	70	28.0404	2	162	96	66	10.59	5.45	1.67	1.32	3.55	57.1	4.9	287	0.62	0.89	755	0
1	73	2	1	1	0	0	159	74.9	29.627	2	172	82	90	6.6	4.1	1.31	1.69	1.82	83.5	5.4	322	0.66	0.86	760	0
1	73	2	1	1	0	0	157	60	24.3418	1	170	90	80	7.79	8.63	2.61	1.31	6.53	71.2	3.8	289	0.89	0.81	850	0
1	73	2	1	1	0	0	162	68.4	26.0631	1	160	75	85	6.67	5.44	2.09	0.97	3.55	90.1	5.4	431	0.54	0.8	670	0
1	73	2	1	1	0	0	142.5	56.9	28.0209	2	141	64.5	76.5	7.29	6.25	1.21	1.79	4.03	47	4.7	125	0.704	0.691	697.5	0
1	73	2	1	1	0	0	151	55.3	24.2533	1	168	86	82	9.38	5.25	1.92	1.09	3.44	58.4	4.7	360	0.577	0.579	578	0
1	73	2	1	1	0	0	155.5	86.6	35.8144	2	160	69	91	7.21	6.52	1.5	1.68	4.27	68.2	7.3	265	0.534	0.577	555.5	0
1	73	2	1	1	0	0	148	76.2	34.7882	2	144.5	73.5	71	6.92	4.89	1.27	1.29	3.08	137.8	9.8	372	0.62	0.53	575	0
0	72	2	0	0	1	1	161.5	62	23.771	0	117.5	76.5	41	5.48	5.1	0.58	1.83	3.13	63.4	5.1	226	0.79	1.24	1015	1
0	72	2	1	0	1	1	162	71.4	27.2062	1	199	109	90	5.99	6.47	3.19	1.26	4.2	90.8	5.2	553	0.832	1.195	1013.5	1
0	72	2	1	0	1	1	166.5	60.5	21.8236	0	157.5	79	78.5	4.78	5.87	1.94	1.54	3.42	93	7	377	0.98	1.114	1047	1
0	72	2	1	0	1	1	172	75.7	25.5882	1	151	84.5	66.5	6.76	4.53	1.04	1.3	2.82	82.3	3.9	413	1.23	1.06	1145	1
0	72	2	0	0	1	1	156	54.8	22.5181	0	122.5	69.5	53	5.24	6.41	1.35	1.45	4.58	78.9	4.7	295	0.92	1.06	990	1
0	72	2	1	0	1	0	170	75.1	25.9862	1	146.5	84	62.5	5.46	5.4	1.64	0.89	3.78	113	5.7	492	1.23	0.97	1100	1
0	72	2	0	0	1	1	168	67.7	23.9867	0	#NULL!	#NULL!	#NULL!	5.13	5.6	1.14	1.56	3.49	90.4	6.5	250	1.01	0.9	955	1
0	72	2	1	0	1	1	168	83	29.4076	2	133.5	68.5	65	5.48	3.78	2.27	0.72	2.23	91.6	6	260	1.02	0.84	930	1
0	72	2	1	0	1	1	158.5	57.3	22.8085	0	177.5	97.5	80	4.38	4.41	0.52	1.58	2.68	74.2	4.8	265	1.07	0.79	930	1
0	72	2	0	0	1	1	169.5	79.6	27.706	1	134	85	49	5.77	3.33	0.86	0.88	1.97	64.7	3.5	312	1.15	0.71	930	1
0	72	2	1	0	1	1	161	63.9	24.6518	1	149	73	76	5.16	4.57	0.58	1.44	2.85	81.9	4.7	209	0.97	0.97	970	0
0	72	2	1	0	1	1	167	62.4	22.3744	0	#NULL!	#NULL!	#NULL!	4.84	5	0.77	1.75	2.99	76.8	4.7	273	0.79	0.949	869.5	0
0	72	2	1	0	1	1	175.5	84.7	27.4998	1	143	84	59	5.04	6.03	1.35	1.44	4.16	119.6	6.8	365	0.89	0.93	910	0
0	72	2	1	0	1	1	158.5	52.3	20.8182	0	190	94	96	5.14	4.81	0.71	1.97	2.56	80.9	5.2	318	0.85	0.92	885	0
0	72	2	1	0	1	1	163	59.2	22.2816	0	167	100	67	5.38	4.03	0.87	1.31	2.26	78	3.2	402	0.99	0.89	940	0
0	72	2	1	0	1	1	152.5	64	27.5195	1	178	97.5	80.5	5.16	5.69	1.17	1.15	4.07	84.9	5.9	363	0.88	0.89	885	0
0	72	2	1	0	1	1	168	70.5	24.9787	1	140	72.5	67.5	5.38	5.83	0.67	1.48	4.11	92	9.5	336	0.45	0.88	665	0
0	72	2	1	0	1	1	166	79	28.6689	2	152	84	68	6.63	4.43	3.14	0.78	1.95	110.4	6.7	639	0.868	0.822	845	0
0	72	2	1	0	1	1	169	81.9	28.6755	2	#NULL!	#NULL!	#NULL!	5.47	4.46	0.97	1.29	2.75	94	5.9	452	0.817	0.815	816	0
0	72	2	0	0	1	1	159	61	24.1288	1	138.5	80	58.5	5.77	5.06	1.01	1.31	3.27	106.4	6.7	251	0.796	0.813	804.5	0
0	72	2	1	0	1	0	162	75.3	28.6923	2	159.5	88	71.5	6.15	4.39	0.86	1.5	2.71	81.7	6.7	262	0.71	0.81	760	0
0	72	2	0	0	1	1	162.5	61	23.1006	0	132.5	74	58.5	6.82	5.11	1.03	1.54	3.12	96.6	4.5	344	0.829	0.804	816.5	0
0	72	2	1	0	1	1	167.5	58.3	20.7797	0	160	102.5	57.5	5.23	5.68	1.91	1.02	3.64	84.6	7.8	196	0.728	0.794	761	0
0	72	2	1	0	1	1	162	67.6	25.7583	1	160	88	72	5.26	5.06	1.42	1.27	2.89	86.3	8.1	397	0.815	0.762	788.5	0
0	72	2	1	0	1	1	159.5	71.2	27.9871	1	210	111	99	6.62	4.2	1	1.01	2.8	70.9	4.5	199	0.8	0.75	775	0
0	72	2	1	0	1	1	168.5	69.7	24.549	1	148.5	83	65.5	4.82	4.24	0.45	1.33	2.65	79.7	4.3	275	0.71	0.71	710	0
0	72	2	1	0	1	1	159	68.7	27.1746	1	200	103	97	5.78	3.91	2.76	0.63	2.17	103	4.2	441	0.45	0.67	560	0
0	72	2	1	0	1	0	166	83.4	30.2656	2	154.5	89.5	65	5.17	5.74	1.88	1.17	3.87	81.3	4.8	296	0.691	0.663	677	0
0	72	2	1	0	1	1	164.5	70.2	25.9421	1	146	87	59	5.06	4.5	0.58	2.14	2.14	80.9	5.8	307	0.66	0.66	660	0
0	72	2	1	0	1	1	173	64.4	21.5176	0	144.5	75	69.5	4.92	6.28	1.3	1.98	3.77	89.4	7.1	352	0.8	0.64	720	0
0	72	2	1	0	1	1	172	81.5	27.5487	1	152.5	93	59.5	5.16	4.01	1.29	1.35	2.22	94.6	6.4	401	0.71	0.64	675	0
0	72	2	1	0	1	1	170	85.6	29.6194	2	166.5	97	69.5	5.77	4.67	0.78	1.32	3.02	80.7	6.7	325	0.89	0.62	755	0
0	72	2	1	0	1	1	173.5	80.2	26.6425	1	140	82	58	5	3.64	1.04	1.18	1.96	72.9	4.2	338	0.84	0.62	730	0
0	72	2	1	0	1	0	167	53.5	19.1832	0	155.5	85.5	70	6.49	5.42	0.9	1.52	3.41	70.3	6.3	245	0.77	0.42	595	0
1	72	2	1	0	1	0	161.5	57.9	22.199	0	148.5	86.5	62	4.98	5.55	1.44	1.3	3.71	62.8	5.2	291	0.75	0.872	811	0
1	72	2	1	0	1	0	155.5	42.9	17.7418	0	159	77.5	81.5	4.72	4.22	0.67	1.78	2.12	56.5	6	203	0.62	0.79	705	0
1	72	2	1	0	1	0	152	62.1	26.8785	1	173	95	78	6.22	5.55	1.37	1.68	3.65	80.4	7.9	287	0.71	0.73	720	0
1	72	2	1	0	1	1	153.5	56	23.7668	0	144	78.5	65.5	6.17	6.03	2.81	1.08	3.99	78.6	4.8	403	0.8	0.65	725	0
0	72	2	1	1	1	0	167.5	87.2	31.0804	2	185.5	79	106.5	7.54	3.64	0.61	1.11	2.17	89.4	6.8	296	0.88	1.1	990	1
0	72	2	1	1	1	1	172	88.6	29.9486	2	136	109	27	7.31	5.09	1.67	1.32	3.23	74.5	5	360	0.93	1.06	995	1
0	72	2	0	1	1	0	164	69.7	25.9146	1	121	72	49	11.16	4.68	1.48	1.03	3.23	63.4	3.8	147	1	0.79	895	0
0	72	2	1	1	1	1	161	65	25.0762	1	158.5	94.5	64	7.55	4.73	2.59	1.26	2.3	79.5	3.6	325	0.671	0.78	725.5	0
0	72	2	1	1	1	1	163	72.6	27.3251	1	138	78.5	59.5	7.4	3.81	0.92	1.06	2.46	68.9	6.9	308	0.947	0.756	851.5	0
0	72	2	1	1	1	1	170	83.9	29.0311	2	160	88	72	6.64	3.65	1.31	1.86	1.04	85.3	6.2	325	0.618	0.63	624	0
0	72	2	1	1	1	1	167	72.9	26.1393	1	180	85.5	94.5	9.75	4.54	0.9	1.35	2.73	85	5.9	358	0.89	0.62	755	0
0	72	2	0	1	1	1	139	59	30.5367	2	122.5	82	40.5	10.47	4.93	1.28	1.43	3.03	77.6	4	325	0.67	0.4	535	0
1	72	2	0	1	1	1	158.5	56.9	22.6492	0	133.5	76	57.5	8.29	5.82	1.33	1.45	3.8	44.2	5	183	0.71	0.843	776.5	0
0	72	2	1	0	0	0	165	73.8	27.1074	1	151.5	84	67.5	6.51	5.65	1.69	1.23	3.78	79.2	6.7	348	0.89	0.9	895	0
0	72	2	1	0	0	0	173.5	78.2	25.9781	1	155.5	98.5	57	5.21	4.27	2.43	1.05	2.08	88.4	6.1	320	0.81	0.84	825	0
0	72	2	1	0	0	1	162	74.2	28.2731	2	169	81	88	5.84	4.22	1.4	1.26	2.47	73.7	4.5	381	0.793	0.837	815	0
0	72	2	1	0	0	0	#NULL!	#NULL!	#NULL!	#NULL!	#NULL!	#NULL!	#NULL!	6.68	4.52	3.28	0.67	2.53	83.5	5	562	0.71	0.79	750	0
0	72	2	0	0	0	1	164.5	52.2	19.2903	0	126.5	80.5	46	5.43	4.56	0.8	1.61	2.53	84.2	3.9	274	0.67	0.755	712.5	0
0	72	2	1	0	0	1	159	62.1	24.5639	1	153.5	86.5	67	5.39	4.82	0.76	2.05	2.44	71.4	4.9	329	0.63	0.755	692.5	0
0	72	2	0	0	0	0	172	78.1	26.3994	1	130	78	52	5.89	6.29	1.23	1.12	4.74	88.2	6.6	516	0.504	0.749	626.5	0
0	72	2	1	0	0	0	161	73.1	28.2011	2	166.5	88.5	78	4.99	5.36	0.98	1.49	3.42	74.9	5.6	224	0.71	0.71	710	0
0	72	2	1	0	0	1	161.5	63.5	24.3461	1	215	89.5	125.5	5.52	5.62	0.94	1.99	3.21	85.9	3.8	359	0.71	0.62	665	0
0	72	2	1	0	0	0	165	68.8	25.2709	1	164	89	75	5.18	1.53	0.82	1.53	6.03	100.7	6.6	480	0.711	0.536	623.5	0
1	72	2	1	0	0	0	158.5	77.6	30.889	2	166	87	79	6.17	6.82	1.83	1.15	5.08	58.7	6.1	240	1.17	1.03	1100	1
1	72	2	1	0	0	0	152.5	43	18.4897	0	147	69	78	4.77	5.48	1.92	1.07	3.55	68.1	6.6	387	0.8	1.01	905	1
1	72	2	1	0	0	0	146	51.2	24.0195	1	161.5	77	84.5	5.98	5.4	1.25	1.75	3.33	64.7	5.6	181	1.028	0.733	880.5	1
1	72	2	1	0	0	0	162.5	78.4	29.6899	2	172.5	91	81.5	5.4	5.15	1.26	1.58	3.38	72.4	6.8	317	1.33	0.71	1020	1
1	72	2	1	0	0	1	146.5	55.7	25.9525	1	158.5	61	97.5	6.51	5.65	1.62	1.41	3.64	75	8	486	0.809	0.978	893.5	0
1	72	2	1	0	0	0	150	54.7	24.3111	1	131.5	74	57.5	5.95	8.4	1.16	1.28	6.56	64.9	5.3	207	0.959	0.972	965.5	0
1	72	2	1	0	0	0	151.5	52.3	22.7864	0	180	96.5	83.5	6.02	4.47	1.37	1.15	2.63	69.1	5.7	258	0.89	0.97	930	0
1	72	2	1	0	0	0	164	71.1	26.4352	1	183.5	102	81.5	5.04	4.77	1.15	1.39	2.93	58.7	5.1	222	0.71	0.97	840	0
1	72	2	1	0	0	0	157	46.5	18.8649	0	140	73	67	4.8	3.79	0.57	1.5	2.11	74.2	8.6	124	0.89	0.95	920	0
1	72	2	1	0	0	0	151	61.5	26.9725	1	155	71	84	5.5	4.63	0.8	1.74	2.5	67.6	4.6	232	0.769	0.934	851.5	0
1	72	2	1	0	0	0	156.5	62.9	25.6816	1	174	104	70	6.21	5.46	0.95	1.69	3.6	62.4	4.5	205	0.421	0.925	673	0
1	72	2	0	0	0	0	154.5	60.9	25.5129	1	121.5	69	52.5	5.18	4.53	0.82	1.35	2.82	41.8	5	193	0.814	0.861	837.5	0
1	72	2	1	0	0	0	156	55	22.6003	0	163	87.5	75.5	5.23	5.27	0.6	1.52	3.59	73.7	7.5	220	0.805	0.808	806.5	0
1	72	2	1	0	0	0	152.5	58.8	25.2835	1	154	76	78	6.41	6.68	2.45	0.91	4.92	71.3	3.9	383	0.747	0.8	773.5	0
1	72	2	1	0	0	0	160	64	25	1	161	94	67	6.11	6.34	1.16	1.46	4.47	66.9	5.7	309	0.88	0.79	835	0
1	72	2	0	0	0	0	148	59.4	27.1183	1	133.5	68	65.5	5.37	5.66	1.3	1.3	3.95	53.7	6.2	239	0.79	0.79	790	0
1	72	2	1	0	0	0	160.5	51.7	20.0697	0	141.5	93	48.5	6.5	4.71	2.06	0.88	2.76	70	4.3	260	0.71	0.79	750	0
1	72	2	1	0	0	0	151.5	51.5	22.4379	0	189.5	96.5	93	5.48	3.4	0.43	1.57	1.6	68.7	7.1	229	0.607	0.782	694.5	0
1	72	2	1	0	0	0	156.5	69.4	28.3355	2	184	86.5	97.5	5.59	6.14	1.43	1.5	4.16	69.8	3.1	352	0.652	0.772	712	0
1	72	2	1	0	0	0	156.5	67.1	27.3964	1	143	88	55	5.41	5.36	2.67	0.92	3.26	80.7	7.1	404	0.71	0.76	735	0
1	72	2	1	0	0	0	144	59.5	28.6941	2	162.5	78.5	84	5.16	4.25	0.85	1.18	2.67	64.6	6.2	119	0.66	0.75	705	0
1	72	2	1	0	0	0	156.5	61.9	25.2733	1	154	84.5	69.5	6.52	5.47	1.26	1.88	3.22	62.6	4.2	231	0.477	0.726	601.5	0
1	72	2	1	0	0	0	146.5	53.5	24.9275	1	168.5	88	80.5	4.65	5.65	1.82	1.44	3.41	48.1	5	201	0.701	0.714	707.5	0
1	72	2	1	0	0	0	155.5	63.1	26.0957	1	144	71.5	72.5	5.97	5.5	0.63	1.52	3.62	64	8	220	0.75	0.71	730	0
1	72	2	0	0	0	0	156	72.3	29.7091	2	126	84	42	6.75	5.67	0.85	1.45	3.98	66.8	5.8	377	0.71	0.71	710	0
1	72	2	1	0	0	1	153	53.7	22.9399	0	142	73	69	6.49	5.16	0.97	1.44	3.44	58.2	5.6	311	0.62	0.71	665	0
1	72	2	1	0	0	0	147.5	56.8	26.1074	1	172.5	79	93.5	6.04	5.63	1.34	1.48	3.58	73.4	10.3	411	0.62	0.71	665	0
1	72	2	1	0	0	0	160.5	56.8	22.0495	0	142.5	78.5	64	5.33	5.06	1.45	1.39	3.2	59.2	3.5	198	0.748	0.68	714	0
1	72	2	1	0	0	0	134.5	40.2	22.2219	0	209	71.5	137.5	4.74	6.78	1.32	1.45	4.82	116.8	10	505	0.62	0.67	645	0
1	72	2	1	0	0	0	156.5	56.8	23.191	0	147	75	72	5.2	6.53	0.85	1.47	4.73	59.2	5.4	229	0.711	0.669	690	0
1	72	2	1	0	0	0	145.5	54.1	25.5547	1	155.5	91	64.5	6.24	4.61	1.42	1.35	2.89	53.1	5.6	228	0.625	0.633	629	0
1	72	2	1	0	0	0	152.5	50.1	21.5426	0	155.5	70.5	85	4.94	4.64	0.88	2.02	2.23	77.8	10.6	272	0.62	0.62	620	0
1	72	2	1	0	0	0	146.5	60.6	28.2356	2	194	89.5	104.5	5.97	5.25	1.17	1.23	3.6	45.8	6.3	213	0.62	0.62	620	0
1	72	2	1	0	0	0	162.5	70	26.5089	1	139	61.5	77.5	5.2	3.79	0.74	1.66	1.89	50	7.2	373	0.57	0.61	590	0
1	72	2	1	0	0	0	152	78.8	34.1066	2	176.5	83	93.5	4.89	5.76	2.29	1.09	3.79	59.1	3.5	326	0.54	0.54	540	0
1	72	2	0	0	0	0	151.5	54.5	23.7449	0	131.5	78.5	53	4.67	4.66	1.62	0.9	2.95	64.6	6.7	314	0.71	0.53	620	0
1	72	2	1	0	0	0	147	58.8	27.2109	1	161.5	85.5	76	5.04	5.78	1.01	2.2	3.29	65.8	5.5	191	0.71	0.53	620	0
1	72	2	1	0	0	0	148.5	53	24.0338	1	137.5	84	53.5	5.1	5.34	1.62	1.07	3.74	60.5	4	332	0.62	0.44	530	0
0	72	2	1	1	0	0	171.5	81.9	27.8455	1	170	85	85	11.36	4.63	0.81	1.61	2.9	76	7	253	1.001	0.919	960	0
0	72	2	1	1	0	1	157	51.8	21.0151	0	180	102.5	77.5	12.32	5.45	1.99	0.89	3.69	67.6	5.9	271	0.734	0.795	764.5	0
0	72	2	1	1	0	0	157	57.4	23.2869	0	148.5	84	64.5	6.69	4	0.9	1.47	1.92	69.4	5.5	335	0.808	0.658	733	0
0	72	2	1	1	0	0	163	60.9	22.9214	0	174.5	93.5	81	9.11	3.48	0.69	1.19	1.89	74.3	3.7	215	0.63	0.53	580	0
1	72	2	1	1	0	0	165	74	27.1809	1	177	88	89	6.78	4.58	3.15	0.93	2.38	67.5	6	347	0.89	0.79	840	0
1	72	2	1	1	0	0	161	79.1	30.5158	2	190	102	88	5.95	4.49	1.38	0.91	2.79	67.1	4.4	393	0.694	0.779	736.5	0
1	72	2	1	1	0	0	153.5	77.3	32.8067	2	156	77	79	5.62	6	2.12	1.36	3.86	58.7	4.9	371	0.978	0.774	876	0
1	72	2	1	1	0	0	155	63.6	26.4724	1	136	92	44	16.23	3.71	1.49	0.9	2.11	64.2	8.2	325	0.78	0.729	754.5	0
1	72	2	1	1	0	0	#NULL!	#NULL!	#NULL!	#NULL!	#NULL!	#NULL!	#NULL!	8.22	4.84	2.25	1.15	2.83	51.9	3.3	208	0.54	0.72	630	0
1	72	2	1	1	0	0	147	42.5	19.6677	0	146.5	77.5	69	6.31	7.14	1.88	1.59	4.97	74.3	6.6	404	0.631	0.687	659	0
1	72	2	1	1	0	0	146	54.6	25.6146	1	147	81	66	8.56	5.75	1.87	1.43	3.68	56.1	4	231	0.658	0.663	660.5	0
1	72	2	1	1	0	0	140	51.2	26.1224	1	170	83.5	86.5	5.19	4.08	5.19	0.76	3.9	50.9	5.3	197	0.71	0.66	685	0
1	72	2	1	1	0	0	154.5	55.3	23.1669	0	142.5	89	53.5	10.03	6.01	1.57	0.89	4.51	60.8	7.6	261	0.642	0.641	641.5	0
1	72	2	1	1	0	0	157.5	71.5	28.8234	2	183.5	90.5	93	7.78	4.67	8.37	0.44	1	70	5	276	0.71	0.64	675	0
1	72	2	1	1	0	0	153	57.1	24.3923	1	165	75.5	89.5	7.88	4.85	1.7	1.07	3.17	67.7	4.1	271	0.851	0.58	715.5	0
1	72	2	1	1	0	0	146	46	21.58	0	141.5	69	72.5	5	4.36	2.45	0.9	2.42	57.5	3.1	312	0.351	0.402	376.5	0
0	71	2	0	0	1	1	169	77.7	27.2049	1	123.5	83.5	40	5.36	5.8	2.2	1.08	3.76	112.6	7.6	566	0.8	1.42	1110	1
0	71	2	1	0	1	1	159.5	66.1	25.9824	1	159	78.5	80.5	5.37	3.96	0.86	1.3	2.22	73.1	3.6	264	1.15	1.24	1195	1
0	71	2	1	0	1	1	166	76.9	27.9068	1	179	83	96	5.75	5.98	2.21	0.81	4.12	90.4	6.3	638	1.33	0.88	1105	1
0	71	2	1	0	1	0	159	66.1	26.1461	1	173	103	70	5.54	6.47	1.73	1.58	4.26	64.3	7.3	252	0.53	0.97	750	0
0	71	2	1	0	1	1	179	73.7	23.0018	0	175.5	94.5	81	6.04	6.22	4.56	0.97	3.29	77.5	5.6	260	0.84	0.88	860	0
0	71	2	1	0	1	1	167.5	75.3	26.8389	1	158.5	77.5	81	5.58	5.42	1.16	1.63	3.49	92	9.6	583	0.677	0.84	758.5	0
0	71	2	1	0	1	0	171.5	78.9	26.8256	1	197	119.5	77.5	5.49	4.93	1.71	1.31	2.94	92	6	551	0.97	0.8	885	0
0	71	2	1	0	1	0	169	69	24.1588	1	147	94.5	52.5	4.9	4.3	1.05	1.4	2.43	86.5	5.8	233	0.73	0.8	765	0
0	71	2	1	0	1	1	171	81	27.7008	1	163	98	65	4.6	5.06	1.4	1.35	3.21	72.6	8.5	308	0.71	0.8	755	0
0	71	2	1	0	1	1	165.5	62.2	22.7088	0	145.5	80	65.5	5.31	4.55	1.01	1.44	2.63	68.3	4.7	252	0.71	0.79	750	0
0	71	2	0	0	1	1	158	54.8	21.9516	0	136.5	78	58.5	4.97	3.97	0.72	1.88	1.98	75.6	6.5	212	0.53	0.79	660	0
0	71	2	1	0	1	1	168.5	80.1	28.2119	2	146	89	57	4.7	5.11	1.03	1.48	3.12	65.1	4.7	232	0.785	0.777	781	0
0	71	2	1	0	1	1	171.5	78.5	26.6896	1	156	78.5	77.5	6.62	5.32	2.41	0.89	3.13	89.1	6.3	280	0.79	0.75	770	0
0	71	2	0	0	1	1	163	69.5	26.1583	1	122.5	71.5	51	4.79	5.62	0.65	1.46	3.82	118.8	7.7	408	0.84	0.73	785	0
0	71	2	1	0	1	1	166	78.5	28.4874	2	175	90	85	5.67	5.51	1	1.35	3.78	93.7	4.7	262	0.748	0.727	737.5	0
0	71	2	1	0	1	1	172	82.2	27.7853	1	167	78.5	88.5	5.65	4.32	0.75	1.25	2.75	78.9	5.4	239	0.88	0.71	795	0
0	71	2	1	0	1	0	159	68.4	27.0559	1	218	107	111	5.19	3.65	1.29	1.44	1.66	122.6	5.1	573	0.62	0.71	665	0
0	71	2	1	0	1	1	164	66.3	24.6505	1	153	83	70	4.93	5.56	0.98	1.16	3.8	73.2	5	451	0.54	0.71	625	0
0	71	2	1	0	1	1	163.5	61.1	22.8563	0	161.5	86.5	75	4.96	6.1	1.69	1.11	4.39	80.9	4.6	263	0.794	0.671	732.5	0
0	71	2	1	0	1	1	163.5	76.2	28.5049	2	137	86	51	6.34	5.73	1.59	0.89	4.09	85.3	5.4	393	0.561	0.63	595.5	0
0	71	2	0	0	1	1	165.5	60.2	21.9786	0	129	71	58	5.96	5.22	1.08	1.58	3.27	88.6	6.8	281	0.62	0.62	620	0
0	71	2	0	0	1	1	174.5	77.4	25.4185	1	131	81	50	5.57	4.87	1.41	0.98	3.31	97.1	5	413	0.62	0.62	620	0
0	71	2	1	0	1	1	168	77.5	27.4589	1	175.5	87.5	88	5.54	4.42	0.91	1.18	2.86	70.4	6	389	0.95	0.51	730	0
0	71	2	1	0	1	0	168.5	73.2	25.7817	1	159	92.5	66.5	6.28	4.81	1.37	0.77	3.75	77.2	4.6	235	0.62	0.48	550	0
1	71	2	1	0	1	0	145	54.2	25.7788	1	113	55	58	5.51	3.51	0.9	1.39	1.8	68.1	4.1	332	0.81	0.62	715	0
1	71	2	1	0	1	0	155	46.5	19.3548	0	141	75	66	4.71	4.04	2.11	0.77	1.97	107.5	6.7	717	0.667	0.534	600.5	0
0	71	2	1	1	1	0	170	78.9	27.301	1	165	83	82	8.91	4.42	1.72	1.01	2.75	79.3	5.1	241	1.01	0.99	1000	1
0	71	2	1	1	1	0	170.5	81.1	27.8979	1	166	74.5	91.5	7.6	3.11	1.45	1.26	1.31	102	7.1	400	1.06	0.97	1015	1
0	71	2	1	1	1	1	170.5	89	30.6155	2	182	89	93	7.88	4.18	1.61	1.25	2.34	76.7	4.4	306	0.75	0.75	750	0
0	71	2	1	1	1	1	169	78.2	27.38	1	157.5	69.5	88	8.81	4.25	1.02	1.64	2.29	65	6	262	0.8	0.71	755	0
0	71	2	1	1	1	1	166.5	65.1	23.4829	0	174	88.5	85.5	5.06	3.64	0.93	1.4	1.99	77.9	3.3	279	0.62	0.45	535	0
1	71	2	1	1	1	0	158.5	50.1	19.9425	0	148.5	61	87.5	6.12	4.41	1.13	1.48	2.35	73.6	6.8	335	0.898	0.737	817.5	0
0	71	2	1	0	0	0	159	71.8	28.4008	2	183	106	77	5.5	4.88	1.27	1.65	2.68	81	5.8	402	0.81	0.79	800	0
0	71	2	1	0	0	1	157	59.7	24.22	1	146	108.5	37.5	5.02	4.05	0.6	1.39	2.45	70.8	3.4	407	0.79	0.764	777	0
0	71	2	1	0	0	0	140	53.7	27.398	1	136	57	79	4.89	3.39	0.62	1.15	1.8	89.1	5.6	274	0.81	0.73	770	0
0	71	2	1	0	0	0	158	62	24.8358	1	156.5	87.5	69	5.13	5.06	1.18	1.66	3	96.5	5.4	394	0.687	0.681	684	0
0	71	2	1	0	0	1	163.5	63	23.567	0	189	102.5	86.5	4.74	3.97	0.47	2.25	1.47	67.6	4.3	242	0.71	0.45	580	0
1	71	2	1	0	0	0	144	50.8	24.4985	1	145	89	56	5.32	4.79	1.03	1.69	2.85	87.2	3.9	266	0.768	1.15	959	1
1	71	2	0	0	0	0	157	58.7	23.8144	0	129	96.5	32.5	5.22	2.58	0.88	0.89	1.07	64.7	6.9	253	0.864	1.025	944.5	1
1	71	2	1	0	0	0	151.5	51.7	22.525	0	171.5	89.5	82	5.98	5.11	0.8	1.46	3.39	67.1	4.6	238	1.06	0.81	935	1
1	71	2	1	0	0	0	154.5	74.1	31.0428	2	165	115	50	6.27	4.67	1.07	1.61	2.76	57.9	3.7	183	0.682	0.927	804.5	0
1	71	2	1	0	0	0	151.5	54.8	23.8757	0	154.5	85	69.5	5.6	6.16	1.18	1.65	4.13	61.1	7.4	273	0.92	0.883	901.5	0
1	71	2	1	0	0	0	157	50.3	20.4065	0	165.5	97	68.5	6.86	3.47	1.08	1	2.14	75	5.5	310	0.71	0.88	795	0
1	71	2	1	0	0	0	148.5	52.2	23.6711	0	142.5	75	67.5	4.92	5.67	1.09	1.45	3.83	63.8	4.2	237	0.75	0.85	800	0
1	71	2	1	0	0	0	159.5	72.4	28.4588	2	159	96.5	62.5	4.48	5.22	1.46	1.32	3.4	78.1	6.1	387	0.749	0.829	789	0
1	71	2	0	0	0	0	149.5	55.7	24.9214	1	137	71	66	4.79	5.99	1.55	1.32	4.11	55	4.6	341	0.793	0.815	804	0
1	71	2	1	0	0	0	152	49.1	21.2517	0	#NULL!	#NULL!	#NULL!	5.04	5.21	1.16	1.17	3.56	68.6	6.6	299	0.71	0.81	760	0
1	71	2	1	0	0	0	150	49	21.7778	0	183	83	100	4.94	4.95	1.33	1.47	3.08	62.4	6.5	155	0.71	0.8	755	0
1	71	2	1	0	0	0	156	63.8	26.2163	1	180	91.5	88.5	4.79	7.59	4.21	1.25	4.18	60.5	6.7	299	0.62	0.8	710	0
1	71	2	0	0	0	0	152	50.6	21.901	0	#NULL!	#NULL!	#NULL!	5.14	6.55	1.57	1.13	4.83	84.2	7	302	0.756	0.796	776	0
1	71	2	1	0	0	0	158.5	54.3	21.6143	0	160.5	94.5	66	5.62	5.13	1.61	1.28	3.06	111	5.6	285	0.828	0.795	811.5	0
1	71	2	1	0	0	0	149	56.4	25.4043	1	161.5	81	80.5	4.54	5.44	1.3	1.22	3.65	60.2	4.3	270	0.79	0.79	790	0
1	71	2	1	0	0	0	149	59.6	26.8456	1	171	88	83	5.36	5.14	1.05	1.39	3.61	59.9	6.2	233	0.927	0.786	856.5	0
1	71	2	1	0	0	0	164	79.6	29.5955	2	170	99	71	5.48	5.56	2.61	0.96	3.53	77.7	4.7	623	0.854	0.758	806	0
1	71	2	1	0	0	0	147.5	55.4	25.4639	1	150	85	65	5.47	5.15	1.57	1.31	3.18	54.1	4.1	275	0.827	0.747	787	0
1	71	2	1	0	0	0	150	44.3	19.6889	0	163	86	77	6.83	5.07	0.91	1.61	3.17	47.6	5.5	200	0.656	0.728	692	0
1	71	2	1	0	0	0	156.5	68.2	27.8455	1	203	100.5	102.5	5.26	4.47	2.19	1.07	2.71	61.6	3.4	295	0.54	0.71	625	0
1	71	2	1	0	0	0	145	42.1	20.0238	0	141	60	81	5.05	5	1.17	1.59	2.9	57.4	5.4	205	0.805	0.707	756	0
1	71	2	1	0	0	0	154	59.9	25.2572	1	139.5	72	67.5	5.31	6.41	1.09	1.9	4.14	59.4	7.3	306	0.869	0.705	787	0
1	71	2	1	0	0	0	149.5	64.3	28.7693	2	147	84	63	5.59	4.39	1.3	1.53	2.4	75.5	6.6	464	0.66	0.66	660	0
1	71	2	0	0	0	0	141	43.9	22.0814	0	123	69	54	4.79	5.39	1.26	1.34	3.61	58.6	4	223	0.636	0.63	633	0
1	71	2	1	0	0	0	158	59.3	23.7542	0	210	107.5	102.5	5.5	5.32	1.15	1.49	3.46	51.3	4.6	195	0.89	0.62	755	0
1	71	2	1	0	0	0	157.5	73.6	29.6699	2	149	88	61	6.36	4.62	4.15	0.68	2.11	79.6	5.6	367	0.821	0.589	705	0
1	71	2	0	0	0	0	154.5	68.5	28.6968	2	126	78	48	5.02	6	2.12	1.35	3.61	59.9	6.2	233	0.569	0.567	568	0
1	71	2	1	0	0	0	154	46.8	19.7335	0	160	86.5	73.5	5.31	4.26	1.34	1.71	2.04	70.2	4.2	171	0.81	0.54	675	0
1	71	2	1	0	0	0	151	53.2	23.3323	0	163.5	82	81.5	6.81	4.73	3.01	1.14	3.57	47.1	5.5	198	0.71	0.53	620	0
0	71	2	0	1	0	0	165	76.4	28.0624	2	129	71	58	13.93	4.33	2.09	1.23	2.31	89.8	7.1	341	1.18	0.89	1035	1
0	71	2	1	1	0	1	177	89.3	28.5039	2	143	82	61	7.05	4.4	0.85	1.3	2.86	77.8	5.7	219	0.879	0.924	901.5	0
0	71	2	1	1	0	1	157	61	24.7475	1	212	98	114	7.1	5.11	1.95	1.21	3.27	72.1	4.4	309	0.736	0.622	679	0
1	71	2	0	1	0	0	153	55.3	23.6234	0	118	74	44	6.19	6.28	1	1.75	4.22	55.2	7.8	202	1.111	0.95	1030.5	1
1	71	2	1	1	0	0	154	67.9	28.6305	2	154.5	88.5	66	13.11	6.84	2.11	1.21	4.97	70	7.1	383	0.97	0.97	970	0
1	71	2	1	1	0	0	160	72.5	28.3203	2	164.5	91	73.5	10.57	7.28	6.03	1.11	3.32	91.1	7.9	339	0.71	0.84	775	0
1	71	2	1	1	0	0	155.5	62.6	25.8889	1	183.5	87.5	96	9.28	4.78	1.25	1.37	3.13	50.2	4	253	0.81	0.79	800	0
1	71	2	1	1	0	0	154.5	59.5	24.9264	1	187.5	91	96.5	7.36	4.1	0.74	1.77	2.04	86	4.9	218	0.54	0.79	665	0
1	71	2	1	1	0	0	157	63.1	25.5994	1	158	88	70	12.14	4.38	1.69	1.03	2.75	94	8.7	411	0.819	0.77	794.5	0
1	71	2	1	1	0	0	146	60.1	28.1948	2	163	93.5	69.5	7.07	4.71	1.61	1.07	3.31	71	4.8	314	0.54	0.71	625	0
1	71	2	1	1	0	0	145	55.9	26.5874	1	168	87.5	80.5	5.81	4.11	3.91	0.65	1.53	71	7.6	373	0.53	0.71	620	0
1	71	2	1	1	0	0	152.5	65.5	28.1645	2	135	74.5	60.5	10.53	5.19	1.47	1.21	3.41	61	6.1	232	0.603	0.701	652	0
1	71	2	1	1	0	0	157	65.1	26.4108	1	174	86.5	87.5	13.02	6.89	2.72	1.21	4.39	70.2	6.5	398	0.683	0.656	669.5	0
1	71	2	1	1	0	0	160	75.9	29.6484	2	147	59.5	87.5	11.03	5.63	1.61	1.34	3.66	55.2	3	247	0.79	0.62	705	0
1	71	2	1	1	0	0	159	82.8	32.7519	2	184	77	107	8.29	4.79	1.3	1.19	3.11	69.1	8.1	413	0.54	0.62	580	0
1	71	2	1	1	0	0	161	86.1	33.2163	2	155	91	64	6.24	3.55	1.8	0.95	1.85	73.5	5.1	286	0.62	0.4	510	0
0	70	2	1	0	1	1	168	70	24.8016	1	170	90.5	79.5	6.02	5.3	2.11	0.85	3.55	93.9	4.8	464	1.1	1.15	1125	1
0	70	2	1	0	1	1	164.5	66.2	24.4639	1	183	92.5	90.5	5.64	5.55	1.72	1.37	3.62	99.4	5.1	566	0.97	1.06	1015	1
0	70	2	1	0	1	1	162	69	26.2917	1	171.5	97	74.5	5.96	5.37	2.03	1.15	3.56	185.7	12.9	437	1.058	0.724	891	1
0	70	2	0	0	1	1	168	64.2	22.7466	0	132	75.5	56.5	5.26	5.13	0.62	1.68	3.31	82.7	6.2	382	1.06	0.71	885	1
0	70	2	1	0	1	0	172	82.8	27.9881	1	144.5	95	49.5	4.86	4.93	1.31	0.97	3.33	84	4.1	246	0.815	0.954	884.5	0
0	70	2	1	0	1	1	166	58.7	21.3021	0	172	91	81	6.13	4.12	0.82	1.29	2.47	77.4	4.9	290	0.72	0.922	821	0
0	70	2	1	0	1	1	160	72.8	28.4375	2	154.5	103	51.5	5.18	4.78	0.7	1.04	3.49	74.6	7.4	327	0.71	0.89	800	0
0	70	2	0	0	1	1	171.5	73.5	24.9896	1	#NULL!	#NULL!	#NULL!	5.47	5.96	1.49	1.34	4.07	93.7	4.9	493	0.88	0.88	880	0
0	70	2	0	0	1	1	168	64.4	22.8175	0	120.5	84.5	36	5.74	4.41	0.72	1.79	2.35	71.8	5	331	0.79	0.8	795	0
0	70	2	0	0	1	1	169.5	82.5	28.7154	2	124	82	42	4.84	5.54	1.34	1.07	3.86	78.7	7.7	443	0.8	0.79	795	0
0	70	2	1	0	1	0	158.5	61.2	24.3609	1	158	78.5	79.5	5.05	3.92	1.31	1.15	2.03	66.6	5.5	252	0.62	0.79	705	0
0	70	2	1	0	1	1	169	71.7	25.1042	1	167	93.5	73.5	5.56	4.54	1.23	1.53	2.63	72.5	6.1	321	0.73	0.75	740	0
0	70	2	0	0	1	1	167	66.7	23.9162	0	117.5	78.5	39	4.49	4.9	0.71	1.35	3.28	67	6.9	248	0.89	0.73	810	0
0	70	2	0	0	1	1	168	72.7	25.7582	1	132.5	81	51.5	5.09	3.58	1.03	1.11	1.93	95.6	4.6	420	0.692	0.723	707.5	0
0	70	2	0	0	1	1	165	61.8	22.6997	0	138	70	68	5.39	5.33	0.93	1.87	3.23	85.2	7.8	259	0.81	0.71	760	0
0	70	2	1	0	1	0	169	74.4	26.0495	1	145	80	65	5.67	5.85	1.19	1.39	4.02	74.2	6.3	286	0.73	0.71	720	0
0	70	2	1	0	1	1	170	67.1	23.218	0	160.5	86	74.5	4.77	5.34	0.58	2.5	2.71	61.5	4.8	295	0.841	0.708	774.5	0
0	70	2	1	0	1	0	172	73.5	24.8445	1	174	87	87	5.38	4.37	1.68	0.92	2.68	68.9	7.9	365	0.861	0.684	772.5	0
0	70	2	1	0	1	1	169.5	76.8	26.7314	1	140.5	83.5	57	5.36	4.98	1.56	1.79	2.62	77.6	5.8	347	0.575	0.674	624.5	0
0	70	2	0	0	1	1	176.5	64.6	20.7369	0	137.5	76	61.5	4.61	3.41	0.53	1.96	1.08	82.1	6.8	352	0.697	0.659	678	0
0	70	2	1	0	1	1	163	47.4	17.8403	0	123.5	66	57.5	5.99	6.02	1.06	1.64	4.32	94.9	8	458	0.79	0.62	705	0
0	70	2	1	0	1	1	165	63	23.1405	0	197.5	91	106.5	5.67	4.02	0.58	2.28	1.59	68.2	5.6	252	0.71	0.62	665	0
0	70	2	1	0	1	1	165	64	23.5078	0	166.5	89	77.5	6.51	4.46	7.29	0.54	1.21	68.9	4.7	279	0.71	0.62	665	0
0	70	2	1	0	1	1	169	77.7	27.2049	1	148	75	73	4.68	4.63	0.72	1.49	2.76	80.9	4.7	347	0.71	0.62	665	0
0	70	2	1	0	1	1	173	58.2	19.446	0	133.5	83	50.5	4.98	4.57	0.99	1.13	3.04	64.6	4.3	357	0.62	0.62	620	0
0	70	2	1	0	1	1	159	59.9	23.6937	0	175	96	79	4.81	5.88	2.37	1.28	3.6	91.1	6.4	305	0.62	0.62	620	0
0	70	2	1	0	1	1	164	55.8	20.7466	0	156	83.5	72.5	5.97	4.51	0.82	1.46	2.61	80.1	4.2	381	0.54	0.62	580	0
0	70	2	0	0	1	1	157.5	54.5	21.9703	0	132	65.5	66.5	5.49	4.86	2.06	1.03	2.93	69.1	5.2	280	0.54	0.62	580	0
0	70	2	0	0	1	1	163	48.4	18.2167	0	130	66.5	63.5	5.86	4.56	0.93	1.84	2.38	64.9	6.9	200	0.62	0.54	580	0
0	70	2	1	0	1	1	160	52.6	20.5469	0	145	91	54	5.48	4.37	1.36	1.51	2.16	67.8	4.5	219	0.8	0.53	665	0
0	70	2	0	0	1	1	166.5	61.7	22.2565	0	109.5	75.5	34	4.29	5.77	0.66	1.98	3.64	95.9	6.8	282	0.622	0.528	575	0
1	70	2	1	0	1	0	151.5	49.1	21.3922	0	134	68	66	5.64	6.54	3.61	0.94	4.43	60.8	3.3	368	0.727	0.791	759	0
1	70	2	0	0	1	0	146.5	56.5	26.3253	1	125	115	10	4.86	4.5	0.85	1.02	3.15	63.7	5.9	271	0.723	0.739	731	0
1	70	2	1	0	1	0	157	77.2	31.3197	2	152.5	84.5	68	5.21	5.94	3.12	1.44	3.31	76.2	5.5	399	0.9	0.71	805	0
1	70	2	1	0	1	0	165	69.3	25.4545	1	220.5	79.5	141	5.84	2.98	1.06	0.43	2.1	55.2	5.4	290	0.53	0.71	620	0
1	70	2	1	0	1	0	160.5	65.5	25.4268	1	153	87	66	6.44	5.56	8.45	0.63	1.35	59	5	436	0.734	0.706	720	0
1	70	2	1	0	1	0	147.5	45.1	20.7297	0	157	91	66	4.91	5.7	1.13	2.08	3.31	57.5	6.6	213	0.73	0.67	700	0
1	70	2	0	0	1	1	153	55.6	23.7515	0	103	66	37	5.14	6.66	1.24	1.61	4.69	70.7	7.4	269	0.56	0.53	545	0
0	70	2	1	1	1	0	165	72.9	26.7769	1	169.5	94	75.5	10.51	4.18	1.31	1.18	2.34	64	3.5	317	1.23	0.88	1055	1
0	70	2	1	1	1	1	162.5	75.5	28.5917	2	172	93	79	10.9	5.43	1.85	1.11	3.51	74.5	4.7	295	0.749	0.848	798.5	0
0	70	2	0	1	1	1	160.5	54.7	21.2343	0	132.5	83.5	49	7.11	5.69	0.53	1.42	4.03	76.8	7.9	196	0.888	0.77	829	0
0	70	2	1	1	1	1	161.5	70	26.8382	1	156	86	70	11.24	6.05	2.44	1.15	4.06	91.4	7.2	415	0.614	0.761	687.5	0
0	70	2	1	1	1	0	172	78.5	26.5346	1	173.5	89.5	84	7.36	5.08	1.32	1.24	3.58	81.7	5.4	340	0.8	0.62	710	0
0	70	2	1	1	1	1	160.5	78.5	30.4733	2	140	85	55	5.87	5.2	1.84	1.08	3.38	95.6	4.1	299	0.54	0.62	580	0
0	70	2	1	1	1	1	175	74.3	24.2612	1	181	97	84	6.69	3.93	0.99	0.78	2.76	85.9	5.7	233	0.8	0.53	665	0
0	70	2	1	1	1	1	169	76.2	26.6797	1	#NULL!	#NULL!	#NULL!	7.02	4.06	1.58	0.93	2.47	91.7	4.8	466	0.73	0.45	590	0
1	70	2	1	1	1	0	152	60.6	26.2292	1	172	90	82	8.2	4.34	1.98	1	2.47	76.9	9.7	324	0.569	0.567	568	0
0	70	2	1	0	0	0	167	77.2	27.6812	1	158	88.5	69.5	4.88	4.28	3.5	0.64	2.19	101.7	4.4	500	1.06	0.99	1025	1
0	70	2	1	0	0	1	155	65.8	27.3881	1	169.5	81.5	88	5.11	5.65	0.79	1.55	3.75	105.9	6.3	328	0.687	0.993	840	0
0	70	2	1	0	0	1	166	82.4	29.9027	2	172.5	82	90.5	5.81	4.9	1.04	1.19	3.27	71.8	5.8	375	0.79	0.97	880	0
0	70	2	1	0	0	1	164.5	76.2	28.1594	2	143.5	85	58.5	5.47	4.13	1.37	1.07	2.52	85.9	7.9	413	0.959	0.906	932.5	0
0	70	2	1	0	0	1	173.5	55.7	18.5036	0	184	89.5	94.5	5.88	4.91	0.74	1.9	2.66	85.9	5.9	353	0.754	0.859	806.5	0
0	70	2	1	0	0	0	#NULL!	#NULL!	#NULL!	#NULL!	188	103	85	4.87	3.29	0.73	1.26	1.59	97.5	5.5	350	0.812	0.783	797.5	0
0	70	2	1	0	0	1	165.5	67.9	24.7898	1	152	78	74	6.13	6.81	1.06	1.08	5.27	74.5	7.4	397	0.71	0.71	710	0
0	70	2	1	0	0	1	169	82.1	28.7455	2	175.5	109.5	66	5.23	3.89	2.04	0.72	2.42	127.1	6.6	316	0.733	0.699	716	0
0	70	2	1	0	0	0	160.5	84.1	32.6472	2	143	82.5	60.5	5.83	4.77	1.04	1.71	2.66	93.7	5.8	473	0.836	0.636	736	0
0	70	2	1	0	0	0	170	64.4	22.2837	0	154.5	91.5	63	6.43	5.2	1.22	0.91	3.77	78.2	5.4	219	0.64	0.62	630	0
1	70	2	1	0	0	0	149	44.9	20.2243	0	177.5	80.5	97	4.26	4.46	1.3	1.69	2.16	83.9	7.2	369	1.304	1.13	1217	1
1	70	2	1	0	0	0	146	63.6	29.8367	2	158.5	86	72.5	6.23	4.6	1.15	2.01	2.18	52.1	5.4	201	0.91	1.037	973.5	1
1	70	2	1	0	0	0	161	82.4	31.7889	2	195	89	106	6.48	5.76	2	1.2	3.83	94.9	6.4	465	1.15	0.62	885	1
1	70	2	0	0	0	0	158	91.2	36.5326	2	121	91.5	29.5	5.45	4.49	1.21	1.16	3.09	56.3	6.3	216	0.73	0.97	850	0
1	70	2	1	0	0	0	150	52.5	23.3333	0	141	91	50	5.95	5.77	1.4	1.62	3.67	48.1	4	205	0.8	0.89	845	0
1	70	2	1	0	0	0	153.5	63.2	26.8226	1	138	69	69	6.06	5.5	1.27	1.55	3.36	71.1	6.5	208	0.698	0.876	787	0
1	70	2	1	0	0	0	158	56.9	22.7928	0	140	72.5	67.5	4.82	5.32	1.2	1.98	2.99	52.5	4.4	274	0.702	0.834	768	0
1	70	2	0	0	0	0	157	72.2	29.2912	2	131	75	56	5.39	5.48	2.1	0.96	3.59	73.4	4.6	311	0.62	0.8	710	0
1	70	2	1	0	0	0	151.5	57.3	24.9649	1	126	73	53	5.26	6.53	1.78	1.47	4.68	60.4	4	208	0.612	0.795	703.5	0
1	70	2	1	0	0	0	166.5	66.1	23.8437	0	138	90	48	6.12	3.88	1.88	0.99	2.02	75.7	4.6	391	0.8	0.79	795	0
1	70	2	0	0	0	0	158	79.6	31.8859	2	130.5	78.5	52	5.05	6.01	2.02	1.31	3.76	48.7	5.5	298	0.588	0.777	682.5	0
1	70	2	1	0	0	1	151.5	59.5	25.9234	1	135.5	79.5	56	6.55	4.77	2.02	0.92	2.93	81.4	7.3	298	0.903	0.75	826.5	0
1	70	2	1	0	0	0	158	64.4	25.7971	1	145.5	72	73.5	6.71	4.89	1.98	1.44	2.78	69.8	5.3	318	0.709	0.748	728.5	0
1	70	2	1	0	0	0	149	52.9	23.8278	0	184	94	90	4.86	6.01	1.72	1.6	3.67	64.7	3.4	147	0.62	0.73	675	0
1	70	2	1	0	0	0	153.5	73.5	31.194	2	141	75.5	65.5	5.83	4.08	0.49	1.7	2.16	77.1	8	305	0.53	0.73	630	0
1	70	2	0	0	0	0	147	48.8	22.5832	0	136	64.5	71.5	5.44	5.45	0.93	1.54	3.67	62.1	4.5	123	0.74	0.729	734.5	0
1	70	2	1	0	0	0	150.5	47.2	20.8386	0	186.5	83.5	103	4.57	5.64	1.41	2.32	2.73	54.4	4.3	174	0.765	0.711	738	0
1	70	2	1	0	0	0	163.5	72.5	27.1208	1	144	67.5	76.5	5.75	5.49	2.77	0.93	4.48	58.6	4.5	361	0.89	0.71	800	0
1	70	2	0	0	0	0	150.5	63.2	27.9026	1	#NULL!	#NULL!	#NULL!	5.59	7.9	1.97	1.07	6.22	67.6	5	216	0.8	0.71	755	0
1	70	2	1	0	0	0	143.5	56.4	27.3889	1	144	72.5	71.5	4.84	4.31	2.78	0.73	2.38	52.9	5.1	186	0.79	0.71	750	0
1	70	2	1	0	0	0	155	75.4	31.384	2	154.5	83.5	71	5.28	5.62	1.83	1.12	3.91	54.4	4.8	221	0.73	0.71	720	0
1	70	2	1	0	0	0	151.5	56.6	24.6599	1	144	84	60	5.57	5.57	1.98	1.37	3.42	78.1	9.3	355	0.71	0.71	710	0
1	70	2	1	0	0	0	154	70	29.5159	2	144	79.5	64.5	6.41	5.91	6.83	0.82	1.4	76.9	6.7	264	0.71	0.71	710	0
1	70	2	1	0	0	0	155.5	60.8	25.1445	1	152	70.5	81.5	5.05	6.75	1.29	1.52	4.85	58.3	4.7	326	0.62	0.71	665	0
1	70	2	1	0	0	0	164.5	74.1	27.3833	1	149.5	84	65.5	6.83	6.93	4.21	1.03	4.3	102	11.1	586	0.62	0.71	665	0
1	70	2	0	0	0	0	156	63	25.8876	1	123	68	55	6.77	5.3	1.56	1.23	3.49	59.6	6.7	243	0.615	0.692	653.5	0
1	70	2	1	0	0	0	147.5	50.3	23.1198	0	180	93.5	86.5	5.45	4.2	1.14	1.44	2.24	59.1	4.5	383	0.722	0.688	705	0
1	70	2	1	0	0	0	153	76.5	32.6797	2	148	97	51	6.14	4.2	1.18	1.25	2.59	62.1	6.1	296	0.73	0.67	700	0
1	70	2	1	0	0	0	156.5	63.8	26.0491	1	183.5	95.5	88	6.88	6.28	0.74	1.45	4.48	63.7	9.5	211	0.848	0.666	757	0
1	70	2	1	0	0	0	153	51.7	22.0855	0	147.5	70	77.5	6.22	6.1	1.24	1.25	4.39	85.6	5.5	306	0.517	0.662	589.5	0
1	70	2	1	0	0	0	145.5	80	37.7889	2	176	88.5	87.5	4.65	5.09	1.71	1.03	3.47	73.9	4.9	393	0.67	0.66	665	0
1	70	2	1	0	0	0	157.5	62.2	25.0743	1	151	79	72	5.29	5.25	0.81	1.76	3.51	57.6	7.5	243	0.664	0.659	661.5	0
1	70	2	1	0	0	0	159	70.2	27.7679	1	189	86.5	102.5	5.37	5.1	1.63	1.14	3.15	76.3	6.5	252	0.802	0.642	722	0
1	70	2	1	0	0	0	154	86.3	36.3889	2	134	83	51	5.59	5.66	1.66	1.57	3.44	62.3	6.4	199	0.609	0.641	625	0
1	70	2	1	0	0	0	161	73.8	28.4711	2	160.5	90.5	70	5.07	4.14	1.57	1.63	2.01	65.5	5.7	266	0.64	0.64	640	0
1	70	2	1	0	0	0	158	61.8	24.7556	1	148.5	91	57.5	5.5	5.62	1.18	1.42	3.8	53.4	5	212	0.731	0.636	683.5	0
1	70	2	1	0	0	0	153.5	64.3	27.2894	1	143	74	69	5.6	6.09	1.58	1.53	3.99	60.8	4.1	364	0.731	0.636	683.5	0
1	70	2	1	0	0	0	148.5	61.2	27.7523	1	200.5	87.5	113	5.22	5.9	0.68	2.03	3.9	64	5.4	323	0.738	0.626	682	0
1	70	2	1	0	0	0	168	86.3	30.5768	2	169.5	78.5	91	5.08	5.64	2.05	1.52	3.4	51.8	3.2	317	0.79	0.62	705	0
1	70	2	0	0	0	0	149.5	40.2	17.9864	0	117	57	60	4.11	5.07	0.47	1.95	3.07	75.4	7.5	317	0.71	0.62	665	0
1	70	2	1	0	0	0	143.5	56	27.1947	1	172.5	97.5	75	6.37	5.28	1.18	1.5	3.48	77.9	5.4	221	0.71	0.62	665	0
1	70	2	0	0	0	0	152.5	63	27.0895	1	129.5	75.5	54	4.95	6.15	2.49	1.24	4.07	71.3	7.1	232	0.64	0.62	630	0
1	70	2	0	0	0	0	168.5	59.4	20.9212	0	115	69	46	5.02	4.93	3.45	0.93	2.67	76.7	5.3	399	0.57	0.62	595	0
1	70	2	1	0	0	0	159	59.9	23.6937	0	149	75.5	73.5	5.15	6.49	1.22	1.49	4.63	68.9	3.5	257	0.45	0.62	535	0
1	70	2	1	0	0	0	154	73.9	31.1604	2	198	99	99	5.24	5.74	1.13	1.55	3.8	80.1	5.9	295	0.637	0.615	626	0
1	70	2	1	0	0	0	148	53.6	24.4704	1	161	78.5	82.5	6	6.4	1.68	1.36	4.47	53.7	5.1	257	0.661	0.601	631	0
1	70	2	0	0	0	0	161	60.3	23.263	0	138	73	65	6.1	5.43	1.01	1.46	3.79	66	6.2	557	0.623	0.596	609.5	0
1	70	2	1	0	0	0	151	59	25.8761	1	161	76	85	6.57	5.89	1.94	1.17	3.9	69.2	5.3	247	0.554	0.576	565	0
1	70	2	1	0	0	0	157	63.3	25.6806	1	145.5	77	68.5	5.32	5.84	1.14	1.22	4.28	68.9	6.4	283	0.623	0.553	588	0
1	70	2	1	0	0	0	146	51.4	24.1133	1	161	93	68	5.6	5.99	1.16	1.72	3.76	62.8	4.1	266	0.62	0.45	535	0
0	70	2	1	1	0	1	155	54.6	22.7263	0	174.5	82	92.5	4.84	3.57	0.7	1.07	3.05	69.1	5.3	182	0.73	1.01	870	1
0	70	2	1	1	0	1	159	50.6	20.015	0	147	86	61	7.21	4.98	1.76	1.19	2.43	67.9	3.8	302	0.823	0.918	870.5	0
0	70	2	1	1	0	1	162.5	74.6	28.2509	2	166	94	72	8.2	5.19	0.92	1.6	3.17	64.4	5.8	300	0.889	0.678	783.5	0
1	70	2	1	1	0	0	159	61.9	24.4848	1	146.5	88.5	58	7.05	6.31	2.6	1.28	3.89	59.1	6.8	233	0.54	1.24	890	1
1	70	2	1	1	0	1	162.5	62.7	23.7444	0	172.5	87.5	85	8.3	6.5	3.8	1.37	3.56	66.4	4.5	267	1.182	0.838	1010	1
1	70	2	1	1	0	0	144	50.9	24.5467	1	158.5	72.5	86	7.55	5.04	0.8	1.21	3.65	55.4	5.8	184	0.828	0.803	815.5	0
1	70	2	1	1	0	0	148.5	55	24.9408	1	142	83	59	6.42	6.99	2.54	1.28	4.77	66.6	5.5	398	0.79	0.79	790	0
1	70	2	1	1	0	0	151	58.4	25.6129	1	180	88.5	91.5	8.93	4.88	0.94	1.98	2.63	66.3	5.4	253	0.566	0.774	670	0
1	70	2	1	1	0	0	149.5	68.9	30.8274	2	171	90	81	6.91	6.08	2.32	1.29	4.09	42.2	3.3	238	0.696	0.745	720.5	0
1	70	2	1	1	0	0	150	48.3	21.4667	0	141	73	68	6.2	5.72	2.96	0.9	3.49	51.5	2.6	144	0.674	0.735	704.5	0
1	70	2	1	1	0	0	155.5	77.3	31.9682	2	157	80	77	8.03	4.52	1.6	1.24	4.06	53.3	4	228	0.71	0.54	625	0
0	69	1	1	0	1	1	161	72.2	27.8539	1	159.5	90.5	69	5.53	5.87	3.07	1.14	3.21	93.6	7.5	318	1.24	1.06	1150	1
0	69	1	0	0	1	1	157.5	53.8	21.6881	0	118	72	46	4.86	4.74	1.11	1.09	3.17	88	5.1	400	0.74	1.06	900	1
0	69	1	1	0	1	1	155.5	55.2	22.8285	0	174.5	74	100.5	6.08	4.37	1.99	1.09	2.26	82.1	4.2	285	1.017	0.963	990	1
0	69	1	1	0	1	1	161.5	52.9	20.282	0	143	81	62	6.73	4.84	0.85	2.19	2.53	81.6	6.4	318	0.99	1	995	0
0	69	1	1	0	1	1	164	75.4	28.0339	2	153	88	65	6.88	4.78	1.15	1.16	3.25	84.6	5.1	264	0.62	0.99	805	0
0	69	1	1	0	1	1	177	68.3	21.8009	0	164	94.5	69.5	5.6	4.83	1.3	1.42	2.99	78.6	5.2	317	0.97	0.97	970	0
0	69	1	1	0	1	1	167.5	70.1	24.9855	1	143	74.5	68.5	4.84	4.14	0.59	1.7	2.11	87.5	5.4	307	0.88	0.92	900	0
0	69	1	1	0	1	1	162	57.4	21.8717	0	169	90	79	6.02	5.58	1.08	1.11	4	55.4	2.4	283	0.54	0.89	715	0
0	69	1	1	0	1	0	166	51.1	18.5441	0	174.5	72.5	102	5.94	4.26	1.13	1.08	2.67	84.2	6.1	491	0.843	0.889	866	0
0	69	1	1	0	1	1	165.5	62.8	22.9279	0	163.5	87.5	76	6.02	5.02	0.95	1.22	3.34	84.3	5.3	307	0.54	0.88	710	0
0	69	1	1	0	1	0	167.5	71	25.3063	1	215	109.5	105.5	5.65	5.24	1.86	1.01	3.46	70.5	4.7	513	0.728	0.877	802.5	0
0	69	1	1	0	1	1	170	83.8	28.9965	2	144.5	79	65.5	4.89	4.34	1.09	0.93	2.96	85	3.5	415	0.691	0.877	784	0
0	69	1	0	0	1	1	158	54	21.6311	0	135	69	66	4.79	4.15	0.96	1.5	2.33	76.9	6.5	264	0.862	0.846	854	0
0	69	1	0	0	1	0	167	89.8	32.1991	2	127	69.5	57.5	5.02	3.11	1.62	0.75	1.62	85	5.5	387	0.8	0.8	800	0
0	69	1	0	0	1	1	165	51	18.7328	0	128.5	90	38.5	5.73	4.64	0.52	2.02	2.29	81.3	7.2	379	0.711	0.782	746.5	0
0	69	1	1	0	1	1	166.5	74.1	26.7294	1	196	114	82	6.27	4.78	1.9	1.15	2.84	101.7	6.1	404	0.837	0.715	776	0
0	69	1	1	0	1	1	169.5	71.5	24.8867	1	155	81.5	73.5	5.35	5.46	1.31	1.06	3.83	68.7	6.9	398	0.79	0.71	750	0
0	69	1	0	0	1	1	159.5	49.5	19.4574	0	138	80.5	57.5	4.36	5.63	0.71	2.44	3.05	84	8	359	0.71	0.71	710	0
0	69	1	0	0	1	1	151	50.8	22.2797	0	136	84	52	5.44	5.23	0.62	1.54	3.38	91	6.1	256	0.71	0.71	710	0
0	69	1	1	0	1	1	164	64.5	23.9813	0	165	100	65	5.53	6.66	1.03	1.47	4.88	76.8	6.3	251	0.71	0.71	710	0
0	69	1	1	0	1	1	172	56.8	19.1996	0	125.5	73	52.5	5.01	4.75	1.11	1.15	2.88	62.8	7	274	0.62	0.71	665	0
0	69	1	0	0	1	1	163	63.7	23.9753	0	137.5	82	55.5	5.45	5.79	1.09	1.76	3.66	81.1	5.3	371	0.62	0.71	665	0
0	69	1	1	0	1	1	166.5	70.1	25.2865	1	189.5	110	79.5	5.36	4.45	1.25	1.35	2.44	93.3	10	383	0.62	0.71	665	0
0	69	1	1	0	1	1	160	72	28.125	2	146	89.5	56.5	6.05	4.39	1.04	1.05	2.84	99.4	5.6	293	0.62	0.71	665	0
0	69	1	1	0	1	1	166.5	65.3	23.5551	0	169.5	86	83.5	5.7	5.84	1.25	1.07	4.35	85	4.8	311	0.54	0.71	625	0
0	69	1	1	0	1	1	169	67.9	23.7737	0	145	86.5	58.5	5.3	5.34	1.15	1.27	3.51	87.9	7.9	208	0.736	0.709	722.5	0
0	69	1	0	0	1	1	171	84.2	28.7952	2	134.5	75	59.5	5.47	4.76	6.94	0.61	1.49	88.8	7	445	0.631	0.702	666.5	0
0	69	1	1	0	1	0	161	60.1	23.1858	0	173	106	67	4.97	5.37	2.61	0.98	3.31	80.5	4.8	258	0.615	0.685	650	0
0	69	1	1	0	1	0	158.5	57.9	23.0473	0	158.5	81	77.5	5.14	4.79	0.84	1.94	2.71	87.1	5.3	271	0.75	0.68	715	0
0	69	1	1	0	1	1	168	57.8	20.479	0	165	80	85	4.68	4.61	1.3	1.59	2.6	85.9	6.5	295	0.742	0.673	707.5	0
0	69	1	1	0	1	0	159.5	68.1	26.7686	1	#NULL!	#NULL!	#NULL!	5.98	2.97	0.91	1.29	1.2	100.9	8	302	0.659	0.641	650	0
0	69	1	1	0	1	0	172.5	80.6	27.0867	1	164	95	69	4.93	5.91	1.69	1.03	4.13	91.4	4.8	459	0.777	0.631	704	0
0	69	1	1	0	1	1	176	88.8	28.6674	2	190	99	91	5.13	4.99	1.19	1.23	3.31	78.5	4.2	419	0.728	0.618	673	0
0	69	1	1	0	1	1	163.5	67.8	25.3626	1	145	104	41	5.36	4.32	1.35	1.48	2.14	91.6	6.1	351	0.618	0.607	612.5	0
0	69	1	1	0	1	0	166	84.6	30.7011	2	115	68.5	46.5	5.41	4.29	0.88	1.3	2.76	92.7	4.8	407	0.71	0.53	620	0
0	69	1	0	0	1	0	173.5	63.2	20.9951	0	121.5	75.5	46	4.76	4.34	0.74	1.28	2.84	78.9	7.6	295	0.53	0.53	530	0
1	69	1	1	0	1	0	153.5	43.5	18.4617	0	140	74	66	4.76	5.53	1.1	1.68	3.52	53.6	4.6	118	1.2	0.79	995	1
1	69	1	1	0	1	0	154	67.4	28.4196	2	127.5	73.5	54	5.32	6.28	2.19	1.04	4.18	118.8	7.9	345	0.849	0.821	835	0
1	69	1	1	0	1	0	149.5	49.3	22.0579	0	159.5	88	71.5	5.12	6.25	1.61	1.76	4.09	75.9	4.2	307	0.71	0.8	755	0
1	69	1	1	0	1	0	145	55.2	26.2545	1	172.5	71.5	101	5.18	4.41	2.87	0.77	2.74	71	5.4	250	0.62	0.71	665	0
0	69	1	0	1	1	1	159	66.9	26.4626	1	135	75	60	28.18	5.69	0.8	1.66	4.02	70.9	5.4	284	0.89	1.06	975	1
0	69	1	1	1	1	1	169.5	82.6	28.7502	2	160.5	91	69.5	6.57	4.94	8.35	0.64	1.47	71.8	7.3	412	1.066	0.938	1002	1
0	69	1	1	1	1	1	172.5	71	23.8605	0	154.5	87.5	67	12.21	4.77	1.27	0.95	3.26	57.3	2.8	276	0.991	0.869	930	0
0	69	1	0	1	1	1	162	64.3	24.5008	1	136.5	76	60.5	6.24	4.14	0.75	0.88	3.06	58.4	4	273	0.71	0.75	730	0
0	69	1	1	1	1	1	160.5	74	28.7264	2	168	88	80	8.01	5.37	1.52	1.34	3.52	67.6	6.2	321	0.62	0.71	665	0
0	69	1	0	1	1	0	160	77.5	30.2734	2	116	64	52	7.17	6.42	15.26	0.51	1.07	86.3	7.6	435	0.684	0.643	663.5	0
1	69	1	1	1	1	0	150.5	59.5	26.269	1	143.5	84.5	59	9.65	5.28	1.34	1.22	3.6	52.9	4.9	280	0.89	0.8	845	0
0	69	1	1	0	0	0	164	63.1	23.4607	0	157	95	62	4.76	5.99	0.92	1.52	4.54	78.5	7.4	251	1.19	0.819	1004.5	1
0	69	1	1	0	0	1	167	86.5	31.0158	2	155.5	79	76.5	6.01	4.38	1.19	1.73	2.3	64.9	4.7	364	0.67	0.87	770	0
0	69	1	0	0	0	1	170.5	66.1	22.738	0	128	69.5	58.5	4.84	3.55	0.67	1.86	1.4	77.6	4.8	289	0.601	0.714	657.5	0
0	69	1	1	0	0	0	154	51	21.5045	0	147	84.5	62.5	5.86	5.38	0.96	1.74	3.28	70.5	5.6	284	0.781	0.701	741	0
0	69	1	1	0	0	0	158.5	63.4	25.2366	1	152	91	61	6.99	5.23	1.18	1.73	3.36	74.7	8.4	227	0.951	0.686	818.5	0
0	69	1	1	0	0	1	158	53.3	21.3507	0	176.5	96.5	80	5.54	4.84	0.89	1.75	2.8	67.4	5.6	347	0.648	0.624	636	0
0	69	1	0	0	0	1	175	68.9	22.498	0	117	69	48	5.49	5.85	0.8	1.68	3.92	77.4	3.4	300	0.63	0.62	625	0
0	69	1	1	0	0	1	157	55.5	22.5161	0	148.5	89	59.5	5.01	4.85	0.58	1.69	2.87	57.6	3.8	231	0.53	0.54	535	0
1	69	1	1	0	0	0	153	71.9	30.7147	2	170.5	83.5	87	5.21	5.11	1.04	1.35	3.42	77.6	6.5	355	1.24	1.11	1175	1
1	69	1	1	0	0	0	150	59.5	26.4444	1	176	80	96	4.68	6.43	5.18	0.83	3.68	74.5	5	333	0.817	1.093	955	1
1	69	1	1	0	0	0	149.5	63.1	28.2323	2	185	89	96	5.17	5.86	2.06	1.35	3.52	70.9	6.5	262	1.07	1.06	1065	1
1	69	1	1	0	0	0	149.5	55.3	24.7425	1	130	77	53	5.79	4.85	0.69	1.56	2.94	85.9	5.2	290	1.01	0.89	950	1
1	69	1	1	0	0	0	158.5	55.7	22.1716	0	141	83	58	5.12	6.39	1.05	2.14	4.01	61.3	6.8	306	0.889	0.942	915.5	0
1	69	1	1	0	0	0	149.5	50.6	22.6396	0	178	78	100	5.78	5.37	0.9	2.07	2.98	57.4	4.5	244	1	0.9	950	0
1	69	1	1	0	0	0	148	67	30.588	2	175	75.5	99.5	5.34	5.29	1.79	1.26	3.41	46.3	3.3	281	0.848	0.864	856	0
1	69	1	1	0	0	0	159.5	73	28.6947	2	179	89	90	5.06	5.28	1.56	1.34	3.32	57.1	4.7	313	0.666	0.818	742	0
1	69	1	1	0	0	0	150	56.9	25.2889	1	#NULL!	#NULL!	#NULL!	4.35	6.79	1.86	1.26	4.78	62.8	4.1	294	0.73	0.81	770	0
1	69	1	1	0	0	1	158	66.7	26.7185	1	142	86.5	55.5	5.76	5.22	1.73	1.1	3.34	65.3	4.6	309	0.736	0.806	771	0
1	69	1	0	0	0	0	143	50	24.4511	1	109	65	44	5.33	4.6	1.09	1.33	2.8	62.1	4.9	231	0.64	0.79	715	0
1	69	1	1	0	0	0	144	56.5	27.2473	1	142	77	65	5.5	6.53	1.69	1.22	2.05	66.5	5.8	286	0.957	0.781	869	0
1	69	1	1	0	0	0	150	63.7	28.3111	2	128	63	65	5.91	5.98	1.77	1.22	4.12	57.6	5.5	342	0.708	0.743	725.5	0
1	69	1	1	0	0	0	166	87.5	31.7535	2	190	105.5	84.5	5.43	4.67	1.41	1.3	2.76	68.9	7.2	251	0.772	0.735	753.5	0
1	69	1	1	0	0	0	146	54	25.3331	1	155	93.5	61.5	5.08	5.58	0.79	2.13	3.22	67.3	5.4	333	0.777	0.725	751	0
1	69	1	1	0	0	0	146.5	57.5	26.7912	1	162	95.5	66.5	4.85	5.82	1.75	1.27	3.34	51.6	6.2	204	0.89	0.71	800	0
1	69	1	1	0	0	0	155.5	57.3	23.697	0	153	102	51	6.46	5.35	1.73	1.16	3.54	64.5	3.4	258	0.62	0.71	665	0
1	69	1	0	0	0	0	153	56.6	24.1787	1	116.5	76.5	40	6.11	4.9	4.68	0.95	2.29	54.5	5.4	206	0.54	0.71	625	0
1	69	1	1	0	0	0	149.5	53	23.7134	0	130	65	65	6.26	4.58	1.11	1.71	2.45	55.8	4.7	251	0.53	0.71	620	0
1	69	1	1	0	0	0	145.5	53	25.0351	1	142	73.5	68.5	5.54	5.18	1.11	1.97	4.53	61.3	5.7	259	0.53	0.71	620	0
1	69	1	1	0	0	0	149.5	53.8	24.0713	1	153.5	79	74.5	5.21	4.52	2.46	0.97	2.49	48.9	4.1	188	0.64	0.698	669	0
1	69	1	1	0	0	0	158.5	68.4	27.2269	1	154	69.5	84.5	4.82	5.47	1.04	1.63	3.55	63.8	5	237	0.754	0.691	722.5	0
1	69	1	1	0	0	0	154.5	61.7	25.8481	1	160	84	76	4.03	5.5	1.27	1.91	3.05	70.8	4.8	318	0.73	0.62	675	0
1	69	1	0	0	0	1	158	56.7	22.7127	0	110	77	33	6.03	5.96	3.67	0.99	3.42	61.7	6.3	380	0.71	0.62	665	0
1	69	1	1	0	0	1	152	54.6	23.6323	0	161	113	48	5.28	6.62	1.22	1.38	4.72	80.4	5.6	363	0.71	0.62	665	0
1	69	1	1	0	0	0	151	74.3	32.5863	2	166	79	87	5.38	5.75	2.04	1.5	3.62	44.4	3.6	222	0.71	0.62	665	0
1	69	1	1	0	0	0	167	77.2	27.6812	1	152	76	76	5.33	4.59	1.05	1.47	2.66	79.3	7.2	308	0.45	0.62	535	0
1	69	1	0	0	0	0	154.5	51.2	21.4493	0	129.5	73.5	56	5.59	6.17	1.59	1.29	4.17	55.8	5	258	0.588	0.616	602	0
1	69	1	1	0	0	0	151.5	46.2	20.1287	0	157.5	74	83.5	4.76	5.74	1.66	1.38	3.69	66.7	4.9	232	0.71	0.6	655	0
1	69	1	0	0	0	0	148.5	62.8	28.4778	2	124	74	50	5.07	5.84	1.37	1.47	3.86	49.2	4.9	203	0.618	0.6	609	0
1	69	1	1	0	0	1	145.9	50.2	23.5827	0	128	72	56	5.98	4.4	0.89	0.91	3.02	63.1	5.4	298	0.557	0.588	572.5	0
1	69	1	1	0	0	0	148.5	57.2	25.9384	1	121	83	38	5.53	6.23	2.16	1.31	4.09	55.7	4.2	222	0.653	0.55	601.5	0
1	69	1	0	0	0	0	151	62.1	27.2356	1	130	77	53	6.88	6.3	1.44	1.99	4.1	71.8	6.4	261	0.6	0.55	575	0
1	69	1	1	0	0	0	151.5	62.9	27.4047	1	138	82.5	55.5	5.55	4.84	5.54	0.95	1.36	53.1	4.3	281	0.54	0.53	535	0
1	69	1	1	0	0	0	158	56.2	22.5124	0	178	83.5	94.5	5.81	6.02	1.92	1.19	3.89	66.5	7.1	108	0.79	0.45	620	0
1	69	1	1	0	0	0	159.5	78.7	30.9352	2	148	78	70	4.57	5.91	1.6	1.45	4.07	73.8	5.2	181	0.54	0.44	490	0
0	69	1	1	1	0	1	177.5	97.4	30.9145	2	165.5	96	69.5	12.45	3.9	1.65	0.69	2.37	83.3	3.4	241	1.11	1.11	1110	1
0	69	1	1	1	0	0	176.5	90.8	29.1472	2	144	81	63	15.52	4.82	0.78	1.53	2.96	84.2	6.2	246	0.963	0.871	917	0
0	69	1	1	1	0	0	170	92.4	31.9723	2	162.5	88	74.5	7.05	6.14	2.41	1.07	4.27	85.6	5.9	324	0.789	0.79	789.5	0
0	69	1	1	1	0	1	150.5	61.1	26.9754	1	144	84	60	7.61	4.62	1.12	1.25	2.75	78.5	5.8	370	0.609	0.687	648	0
0	69	1	1	1	0	1	161.5	57.8	22.1607	0	152	93.5	58.5	8.28	4.62	1.02	1.27	2.99	75.6	5.2	390	0.652	0.673	662.5	0
1	69	1	1	1	0	0	146.5	55.7	25.9525	1	189	86	103	8.04	4.14	1.05	1.3	2.36	59.9	4.6	286	1.201	1.1	1150.5	1
1	69	1	1	1	0	0	150	53.9	23.9556	0	147	79	68	5.48	4.59	1.48	1.41	2.56	55.7	6.4	227	0.81	1.06	935	1
1	69	1	1	1	0	0	156	62.5	25.6821	1	170.5	89.5	81	8.76	5	1.41	1.35	3.01	57.5	3.3	181	0.79	0.89	840	0
1	69	1	1	1	0	0	152.5	69.5	29.8844	2	181.5	92	89.5	14.21	6.59	2.52	1.28	2.47	47.3	5.9	202	0.91	0.879	894.5	0
1	69	1	0	1	0	0	156.5	68.4	27.9272	1	122	77	45	7.29	6.83	3	1.25	4.07	67.8	4.4	278	0.593	0.814	703.5	0
1	69	1	1	1	0	0	155	64.8	26.9719	1	181.5	94.5	87	7.05	4.56	0.97	1.49	2.69	68.1	4.6	164	0.53	0.8	665	0
1	69	1	1	1	0	0	150	64	28.4444	2	162.5	78	84.5	8.3	4.79	1.23	1.17	3.29	83.3	4.9	209	0.71	0.79	750	0
1	69	1	1	1	0	0	153	63.8	27.2545	1	199	115	84	8.34	6.85	5.08	1.14	2.94	73.4	4.6	315	0.592	0.749	670.5	0
1	69	1	0	1	0	0	148	45.8	20.9094	0	131	66	65	7.11	3.72	2.09	0.68	2.11	64.8	5.2	398	0.735	0.674	704.5	0
1	69	1	1	1	0	0	160	62.2	24.2969	1	145	78	67	10.16	4.86	1.17	1.78	2.65	48	5.5	188	0.67	0.67	670	0
0	68	1	1	0	1	1	157.5	76.2	30.7181	2	182.5	96	86.5	6.75	5.11	1.37	1.13	3.5	64.7	4.2	314	0.77	1.44	1105	1
0	68	1	1	0	1	1	170	73.8	25.5363	1	118.5	76	42.5	4.9	5.82	2.94	1.07	3.63	73.8	3.9	350	1.26	1.32	1290	1
0	68	1	0	0	1	1	179.5	107.4	33.3331	2	#NULL!	#NULL!	#NULL!	6.09	4.59	1.66	0.94	2.92	99.6	4.4	357	0.84	1.1	970	1
0	68	1	1	0	1	1	167	73.2	26.2469	1	159	77	82	5.8	4.83	0.96	0.86	3.56	85.1	4.2	263	0.57	1.06	815	1
0	68	1	1	0	1	0	178	77.4	24.4287	1	138.5	85	53.5	6.38	5.31	0.92	1.31	3.65	66.8	6.5	326	1.01	0.81	910	1
0	68	1	0	0	1	1	162	64	24.3865	1	128.5	77.5	51	5.88	6.04	1.96	0.84	4.36	88.5	5.7	430	1.06	0.71	885	1
0	68	1	0	0	1	0	166	87	31.5721	2	129.5	74	55.5	4.42	4	2.11	0.92	2.11	92	5.9	323	1.06	0.62	840	1
0	68	1	0	0	1	1	170.5	76.4	26.2812	1	117	71	46	4.91	5.39	0.66	1.65	3.55	88.4	4.9	291	0.86	1	930	0
0	68	1	1	0	1	1	157.5	77	31.0406	2	146	100	46	5.02	3.63	0.84	1.3	1.84	64.4	4.4	310	0.788	0.998	893	0
0	68	1	1	0	1	1	167.5	76.4	27.231	1	160	99	61	4.76	5.07	1.38	1.22	3.36	92	5.5	349	0.801	0.994	897.5	0
0	68	1	1	0	1	1	170.5	81.8	28.1387	2	155.5	81	74.5	4.78	4.71	1.51	0.96	3.24	81.5	5.1	418	0.8	0.99	895	0
0	68	1	0	0	1	1	158.5	50.7	20.1813	0	123	70	53	4.88	5.49	0.56	2.11	3.3	65.5	7.7	337	0.751	0.915	833	0
0	68	1	1	0	1	1	171	68.6	23.4602	0	156.5	88	68.5	5.7	5.7	2.35	1.17	3.55	76	4.3	395	0.615	0.903	759	0
0	68	1	1	0	1	1	162.5	72.4	27.4178	1	178	110	68	6	5.1	1.36	1.53	3.39	102.7	4.6	469	0.79	0.89	840	0
0	68	1	1	0	1	1	160	64.5	25.1953	1	172	92.5	79.5	5.33	3.96	1.04	0.9	2.54	92.3	6.9	354	0.54	0.89	715	0
0	68	1	1	0	1	0	177.5	81.5	25.8679	1	156	89	67	5.06	3.97	0.75	1.37	2.22	76.5	5.1	242	0.777	0.868	822.5	0
0	68	1	1	0	1	1	167	77.4	27.7529	1	146.5	72.5	74	4.49	4.77	1.56	1.11	2.98	79.5	4.9	291	0.674	0.813	743.5	0
0	68	1	1	0	1	0	166	59.8	21.7013	0	181.5	96	85.5	5.59	4.06	0.56	1.53	2.27	58.4	6	171	0.993	0.809	901	0
0	68	1	1	0	1	0	150	47.2	20.9778	0	146	90	56	5.57	3.04	1.29	0.79	1.64	80	6.6	276	0.71	0.8	755	0
0	68	1	1	0	1	1	163.5	59.6	22.2952	0	175.5	90.5	85	4.78	4.59	1.78	1.13	2.77	99.1	5.9	301	0.62	0.8	710	0
0	68	1	1	0	1	1	158.5	58.6	23.3259	0	142	78	64	6.33	5.52	1.58	0.91	4.05	84.6	6.6	310	0.97	0.79	880	0
0	68	1	1	0	1	1	156.5	56.5	23.0685	0	154	76.5	77.5	5.16	5.25	0.73	2.37	2.59	74.6	5.4	349	0.67	0.79	730	0
0	68	1	1	0	1	0	168	83.7	29.6556	2	151.5	78.5	73	6.04	5.11	2.78	0.74	3.28	87	5.5	294	0.79	0.78	785	0
0	68	1	1	0	1	1	157.5	63.3	25.5178	1	155	94	61	6.04	5.56	0.89	1.51	3.71	70.9	6	342	0.746	0.752	749	0
0	68	1	1	0	1	1	173	69.4	23.1882	0	167	94	73	6.26	4.84	1.13	1.4	2.91	68.4	4.8	345	0.75	0.75	750	0
0	68	1	1	0	1	1	171	66.3	22.6736	0	140.5	77	63.5	4.86	5.03	0.83	1.92	2.73	70	7.7	328	0.845	0.743	794	0
0	68	1	0	0	1	1	166	60.6	21.9916	0	121.5	73	48.5	4.53	4.83	0.52	1.21	3.41	103.9	5	399	0.804	0.734	769	0
0	68	1	0	0	1	1	163.5	55.4	20.724	0	137	72	65	4.64	5.28	0.95	1.47	3.4	83.4	6	248	0.908	0.73	819	0
0	68	1	1	0	1	1	178	79.3	25.0284	1	148	89	59	5.45	5.87	1.13	1.43	4.02	82.6	6.3	415	0.88	0.73	805	0
0	68	1	1	0	1	1	175.5	78.1	25.3569	1	146	84.5	61.5	5.7	4.71	3.36	0.81	2.39	82.1	7.6	366	0.75	0.73	740	0
0	68	1	0	0	1	0	168	71	25.1559	1	135	84.5	50.5	4.96	4.94	0.81	1.21	3.38	99.4	6.1	355	0.62	0.73	675	0
0	68	1	0	0	1	0	164	68.2	25.3569	1	134	89	45	5.36	4.66	1.8	1.11	2.66	82.5	6.6	386	0.97	0.71	840	0
0	68	1	0	0	1	0	162	51.8	19.7378	0	127.5	70	57.5	5.76	4.85	2.52	0.88	2.46	94	5.8	311	0.71	0.71	710	0
0	68	1	1	0	1	0	164	79.1	29.4096	2	172	88	84	6.34	4.99	1.02	1.31	3.44	79.5	5.5	321	0.71	0.71	710	0
0	68	1	0	0	1	1	164	49	18.2183	0	107	72.5	34.5	5.38	5.38	0.64	1.8	3.5	87.5	6.9	286	0.634	0.71	672	0
0	68	1	1	0	1	1	167	67.1	24.0597	1	115	76	39	5.28	3.36	1.16	1.05	1.86	79.2	5.8	245	0.62	0.71	665	0
0	68	1	0	0	1	1	166	66.3	24.0601	1	135	79	56	4.23	4.46	0.79	0.97	3.08	81.1	3.4	264	0.62	0.71	665	0
0	68	1	1	0	1	1	165.5	69.7	25.447	1	157.5	81.5	76	5.37	4.62	1.07	1.28	3.12	89.1	4.6	330	0.44	0.71	575	0
0	68	1	1	0	1	1	166.5	63.7	22.9779	0	188	90	98	4.74	4.89	0.64	1.66	2.95	78.4	5.1	290	0.719	0.691	705	0
0	68	1	1	0	1	1	167.5	68.5	24.4152	1	155	85	70	6	5.53	2.27	1.01	3.42	113	8.3	562	0.593	0.688	640.5	0
0	68	1	1	0	1	1	150	86	38.2222	2	182.5	115.5	67	5.6	5.48	2.74	0.91	3.47	100.1	4.3	420	0.762	0.676	719	0
0	68	1	0	0	1	1	166	66.4	24.0964	1	99.5	61.5	38	5.06	4.75	0.67	2.22	2.46	68.6	5.4	237	0.64	0.67	655	0
0	68	1	1	0	1	1	184.5	82.3	24.1773	1	151.5	85	66.5	4.92	3.88	0.96	1.64	1.81	89.7	6	379	0.625	0.649	637	0
0	68	1	1	0	1	0	161	72.6	28.0082	2	141.5	88.5	53	4.77	4.6	1.08	1.32	2.96	93.6	6.4	344	0.54	0.64	590	0
0	68	1	0	0	1	1	165.5	48.3	17.634	0	127	77	50	4.56	4.61	0.97	1.17	3.03	69.7	6.1	209	0.89	0.62	755	0
0	68	1	1	0	1	1	162.5	67.2	25.4485	1	162	91	71	5.1	6.07	1.5	1.27	4.32	65	7.6	318	0.8	0.62	710	0
0	68	1	1	0	1	1	171	67.1	22.9472	0	187	83	104	6.19	5.67	2.91	1.29	3.01	85.3	4.1	337	0.64	0.62	630	0
0	68	1	1	0	1	1	165.5	73.4	26.7979	1	143.5	83.5	60	6.39	7.71	4.25	1.34	5.06	85.5	5.5	580	0.62	0.62	620	0
0	68	1	1	0	1	1	168	69.5	24.6244	1	152	89	63	5.11	5.23	1.89	1.18	2.98	82.6	7.8	311	0.53	0.62	575	0
0	68	1	0	0	1	1	152	63.1	27.3113	1	138	80	58	5	6.14	2.48	0.92	4.22	98.2	6.2	336	0.59	0.6	595	0
0	68	1	0	0	1	1	176	70.8	22.8564	0	127	82	45	5.88	4.7	1.32	1.5	2.71	85.1	5.6	295	0.48	0.57	525	0
0	68	1	0	0	1	0	159.6	62.7	24.6151	1	128.5	77.5	51	5.23	3.92	1	0.98	2.46	97.2	6.9	463	0.53	0.54	535	0
0	68	1	1	0	1	1	157.5	70	28.2187	2	152	102	50	5.8	5.22	1.56	1.45	3.44	76	6	325	0.62	0.53	575	0
0	68	1	1	0	1	1	173.5	69.6	23.1212	0	146.5	84.5	62	5.01	5.14	1.86	1.2	3.42	73.1	4.6	260	0.54	0.53	535	0
0	68	1	1	0	1	1	164	63.1	23.4607	0	146.5	85.5	61	5.55	4.89	0.71	1.53	2.97	93	7.6	427	0.97	0.19	580	0
1	68	1	1	0	1	1	149.5	47.2	21.1183	0	194	90	104	5.24	5.66	1.27	1.66	3.6	69.3	4.5	261	0.901	0.88	890.5	0
1	68	1	0	0	1	0	154.5	48	20.1087	0	125.5	64.5	61	4.55	5.63	1.18	1.89	3.43	66.7	4.6	235	0.8	0.75	775	0
1	68	1	1	0	1	1	#NULL!	#NULL!	#NULL!	#NULL!	#NULL!	#NULL!	#NULL!	6.15	4.65	1.09	1.22	2.97	61.9	5	252	0.6	0.67	635	0
1	68	1	0	0	1	0	147	54.9	25.4061	1	136	83	53	4.73	5.83	0.97	1.45	4.02	80.7	7.3	290	0.667	0.598	632.5	0
0	68	1	1	1	1	1	157	61.4	24.9097	1	169.5	89.5	80	7.5	5.76	2.47	0.81	3.98	51.2	3.5	153	1.03	1.86	1445	1
0	68	1	1	1	1	1	171.5	73	24.8196	1	150	82	68	12.07	5.75	1.27	1.06	3.97	89.1	4.2	188	0.632	0.902	767	0
0	68	1	1	1	1	0	167	72.8	26.1035	1	165	92	73	5.03	4.34	0.77	1.12	2.74	89.1	4.9	180	0.723	0.744	733.5	0
0	68	1	1	1	1	1	154	61.8	26.0584	1	156	95.5	60.5	5.46	5.01	0.97	0.91	3.59	66.3	7.4	237	0.776	0.713	744.5	0
0	68	1	1	1	1	0	164.5	83.5	30.8571	2	153	85	68	14.36	6.38	3.69	1.06	3.62	98.8	9.1	412	1	0.71	855	0
0	68	1	1	1	1	1	166	85.1	30.8826	2	154	91	63	9.21	4.51	1.13	0.78	3.32	85	3.7	309	0.71	0.62	665	0
0	68	1	1	1	1	1	169	69.8	24.4389	1	170	87.5	82.5	6.17	4.88	1.09	1.23	3.34	104	4.5	223	0.55	0.591	570.5	0
0	68	1	1	1	1	0	158	68	27.2392	1	154.5	83	71.5	10.42	9.19	29.62	0.57	0.71	74.2	5.2	410	0.53	0.53	530	0
0	68	1	0	1	1	1	167	56	20.0796	0	132	77.5	54.5	11.33	5.5	1.47	1	3.94	51.2	6.4	247	0.71	0.45	580	0
1	68	1	1	1	1	0	158.5	56.1	22.3308	0	151	74	77	12.17	5.76	2.48	0.9	3.84	45.4	4.6	222	0.819	0.912	865.5	0
0	68	1	1	0	0	0	166.5	75.2	27.1262	1	165	121.5	43.5	4.9	4.43	0.87	1.26	2.86	75.6	5.5	220	0.88	0.79	835	0
0	68	1	1	0	0	1	167.5	69.1	24.6291	1	174.5	115.5	59	5.46	4.47	0.64	1.32	2.91	78.7	8.4	268	0.58	0.78	680	0
0	68	1	1	0	0	0	174	82.3	27.1832	1	139	87	52	5.54	4.93	2.64	0.89	3.02	76.8	4.3	376	0.643	0.576	609.5	0
0	68	1	1	0	0	0	161.5	73.2	28.0651	2	187	99	88	5.22	3.91	2.07	1.1	1.9	64.7	3.6	299	0.73	0.54	635	0
1	68	1	1	0	0	0	147	64.3	29.7561	2	138	74	64	4.68	4.24	0.87	1.43	2.67	48.9	5.1	250	0.62	1.88	1250	1
1	68	1	1	0	0	0	161	66.4	25.6163	1	194.5	117.5	77	4.59	5.79	1.31	1.74	3.51	97.8	9.7	422	0.887	1.116	1001.5	1
1	68	1	1	0	0	0	154	61.9	26.1005	1	140.5	77	63.5	4.83	4.79	1.41	1.35	2.73	61	5.5	173	0.71	1.1	905	1
1	68	1	1	0	0	0	150	57.7	25.6444	1	144	83	61	5.42	4.24	0.97	1.48	2.44	53.2	6.6	255	0.913	1.091	1002	1
1	68	1	1	0	0	0	154.5	55.5	23.2507	0	190	93	97	5.37	4.47	1.79	1.03	2.84	72.9	6	334	1.079	0.994	1036.5	1
1	68	1	1	0	0	0	149.5	44.9	20.0893	0	146.5	88.5	58	6.06	5.36	0.51	2	3.14	47.8	3.7	155	1.15	0.9	1025	1
1	68	1	1	0	0	0	156	47.7	19.6006	0	153	84	69	5.24	7.31	2.19	1.04	5.55	66.6	5.4	320	1.07	0.79	930	1
1	68	1	1	0	0	0	154	47.1	19.86	0	216	102	114	5.82	4.69	0.91	1.41	2.89	67.1	5.6	295	1.164	0.78	972	1
1	68	1	1	0	0	0	147.5	75	34.4729	2	170.5	90.5	80	5.29	4.76	1.45	0.81	3.19	58.3	4.1	214	0.864	0.99	927	0
1	68	1	1	0	0	0	142.5	43.7	21.5205	0	153	71.5	81.5	5.41	5.67	0.78	1.76	3.44	58.4	4.7	360	0.88	0.97	925	0
1	68	1	1	0	0	0	146	52.9	24.817	1	247	118	129	6.08	5.4	1.96	1.08	3.47	54.7	5.1	163	0.75	0.91	830	0
1	68	1	1	0	0	0	143.5	59.3	28.7972	2	194.5	98.5	96	4.72	5.83	1.54	1.76	3.68	82.4	6.1	447	0.747	0.91	828.5	0
1	68	1	1	0	0	0	157	50.6	20.5282	0	141	85	56	6.19	4.32	1.24	1.49	2.37	73.7	6.6	146	0.59	0.86	725	0
1	68	1	1	0	0	0	151	62.3	27.3234	1	165	100	65	5.47	4.88	2.68	1.32	2.65	65.3	6.1	251	0.87	0.858	864	0
1	68	1	1	0	0	0	161	75.6	29.1655	2	162.5	82.5	80	5.07	4.1	1.39	1.22	2.29	71.7	4.8	208	0.762	0.822	792	0
1	68	1	1	0	0	0	150	55.3	24.5778	1	163	87	76	4.86	4.96	0.85	1.86	2.8	53.4	3.9	237	0.796	0.821	808.5	0
1	68	1	1	0	0	0	156	56.1	23.0523	0	142	78	64	5.38	5.15	0.65	1.58	3.21	49.7	3.6	193	0.685	0.81	747.5	0
1	68	1	1	0	0	0	145	71.1	33.8169	2	137.5	76.5	61	4.88	5.09	1.2	1.58	3.15	62.3	5.3	215	0.97	0.8	885	0
1	68	1	1	0	0	0	160	67.6	26.4062	1	178	100	78	5.88	5.45	2.68	1	3.46	57.1	5.1	285	0.93	0.8	865	0
1	68	1	0	0	0	0	149	54.4	24.5034	1	131.5	75	56.5	4.86	6.1	1.33	1.15	4.25	54.9	4.7	279	0.62	0.8	710	0
1	68	1	1	0	0	0	148.5	56.4	25.5756	1	162	80	82	5.46	6.47	1.57	1.7	4.31	55.8	6.3	369	0.772	0.778	775	0
1	68	1	1	0	0	0	151	68.4	29.9987	2	180	89	91	5.32	4.57	1.25	1.15	2.9	66.4	5.3	263	0.729	0.776	752.5	0
1	68	1	1	0	0	0	158	67.8	27.1591	1	159.5	93	66.5	5.07	5.09	1.1	1.4	3.29	74.2	10.5	438	0.626	0.745	685.5	0
1	68	1	1	0	0	0	161.5	64.3	24.6528	1	165.5	92.5	73	6.33	5.2	2.48	1.09	3.19	54.9	6.5	510	0.805	0.743	774	0
1	68	1	1	0	0	0	153.5	57.5	24.4034	1	156	73	83	6.29	5.21	1.48	1.54	3.08	58	4.1	313	0.697	0.735	716	0
1	68	1	0	0	0	0	156	50.8	20.8744	0	129	68	61	5.02	6.42	0.62	1.82	4.46	68.6	7.6	244	0.67	0.728	699	0
1	68	1	1	0	0	0	156.5	53.8	21.9661	0	143.5	77	66.5	5.34	6.1	1.06	2.51	3.32	61.1	5.9	303	0.8	0.71	755	0
1	68	1	1	0	0	0	150.5	60.3	26.6222	1	152.5	76.5	76	4.96	3.67	2.09	1.11	1.65	50	5.5	194	0.79	0.71	750	0
1	68	1	0	0	0	0	149	50.4	22.7017	0	126.5	70.5	56	5.06	5.04	1.51	1.24	3.92	57.5	4.5	326	0.71	0.71	710	0
1	68	1	1	0	0	0	154.5	59	24.717	1	144	79.5	64.5	5.88	5.61	2.48	0.89	3.4	64.9	5.9	268	0.71	0.71	710	0
1	68	1	0	0	0	0	151.5	76.3	33.2429	2	132.5	73	59.5	5.44	5.39	0.66	1.45	3.68	60.7	5.1	292	0.64	0.71	675	0
1	68	1	1	0	0	0	161.5	89.2	34.1995	2	#NULL!	#NULL!	#NULL!	5.34	4.2	1	1.32	2.46	66.2	8.1	295	0.62	0.71	665	0
1	68	1	1	0	0	0	152.5	53.5	23.0046	0	199.5	99.5	100	6.05	5.34	1.17	1.49	3.37	56.3	4.8	180	0.664	0.703	683.5	0
1	68	1	0	0	0	0	149.5	52.9	23.6686	0	124	75	49	4.81	5.71	0.86	1.94	3.51	44.8	8.3	223	0.752	0.689	720.5	0
1	68	1	1	0	0	0	153	58.5	24.9904	1	146	79.5	66.5	5.66	5.04	0.98	1.35	3.34	92.4	5.4	5.4	0.801	0.68	740.5	0
1	68	1	1	0	0	0	153	63.5	27.1263	1	152.5	90.5	62	5.35	4.64	2.36	0.95	2.72	62.4	3.7	283	0.737	0.673	705	0
1	68	1	1	0	0	0	158.5	79.3	31.5656	2	152	80	72	5.76	6.18	3.34	1.11	3.86	59.3	4.1	240	0.93	0.67	800	0
1	68	1	1	0	0	0	156.5	60.5	24.7017	1	141.5	88.5	53	5.99	3.22	0.79	1.31	1.49	53.7	5.9	229	0.605	0.659	632	0
1	68	1	1	0	0	0	150	78.5	34.8889	2	153	75	78	5.04	4.71	1.38	1.6	2.69	64.2	3.7	154	0.721	0.653	687	0
1	68	1	1	0	0	0	151	54.9	24.0779	1	165.5	86.5	79	5.89	5.53	0.53	1.65	3.65	62.1	4.1	226	0.64	0.644	642	0
1	68	1	0	0	0	0	167.5	75.3	26.8389	1	135	76	59	4.94	4.98	1.7	1.1	3.12	66.2	5.7	120	0.71	0.641	675.5	0
1	68	1	1	0	0	0	158	67.2	26.9188	1	170.5	92	78.5	5.62	4.75	1.53	1.36	2.69	60.2	4.1	224	0.629	0.635	632	0
1	68	1	1	0	0	0	163.5	55.5	20.7614	0	176.5	92	84.5	5.46	5.25	0.74	1.94	2.99	65.8	4.5	218	0.784	0.634	709	0
1	68	1	1	0	0	0	153	74.1	31.6545	2	167.5	69	98.5	5.59	4.62	3.09	1.12	2.34	71.8	5.1	333	0.89	0.62	755	0
1	68	1	1	0	0	0	156.5	65.8	26.8656	1	161	73	88	5.4	4.46	1.62	0.93	2.79	68.1	3.8	305	0.79	0.62	705	0
1	68	1	1	0	0	0	155	59	24.5578	1	128	68.5	59.5	5.8	5.68	1.57	1.27	3.77	59.4	7.5	426	0.71	0.62	665	0
1	68	1	1	0	0	0	140	77.8	39.6939	2	156.5	89	67.5	4.5	5.17	1.25	1.37	3.36	60.4	5.4	327	0.62	0.62	620	0
1	68	1	1	0	0	0	159.5	100.5	39.5043	2	144.5	88.5	56	5.13	5.33	0.83	1.32	3.63	69.4	11.4	366	0.52	0.62	570	0
1	68	1	1	0	0	0	154	83.9	35.377	2	141.5	87	54.5	5.92	5.33	1.42	1.13	3.57	84.2	5.5	395	0.44	0.62	530	0
1	68	1	1	0	0	0	148	63.3	28.8988	2	140	85	55	5.34	6.11	1.22	1.57	3.96	69.2	5.1	233	0.529	0.577	553	0
1	68	1	1	0	0	1	154	86.3	36.3889	2	159	93	66	4.94	5.36	1.74	1.29	3.6	68.4	6.4	264	0.55	0.55	550	0
1	68	1	1	0	0	0	153.5	54.5	23.1302	0	149	72.5	76.5	5.62	6.09	1.61	1.2	4.53	61.3	5.7	259	0.71	0.54	625	0
1	68	1	1	0	0	0	153	77.6	33.1496	2	158.5	78.5	80	6.18	4.64	1.34	1.21	2.76	60.7	6.5	420	0.71	0.54	625	0
1	68	1	1	0	0	0	152.5	57.5	24.7245	1	155	95.5	59.5	5.36	3.14	1.47	1.19	1.1	49.7	5.7	140	0.635	0.538	586.5	0
1	68	1	1	0	0	0	158	67	26.8386	1	166	85	81	4.87	5.51	1.09	1.14	3.97	77.1	4.7	264	0.71	0.53	620	0
1	68	1	1	0	0	0	160.2	60.2	23.4569	0	144.5	81	63.5	5.27	5.28	2.71	0.97	3.01	56	3.4	297	0.64	0.45	545	0
1	68	1	0	0	0	0	160.5	72.3	28.0665	2	128	73	55	5.02	5.13	2	1.17	3.21	55.1	6	444	0.88	0.44	660	0
1	68	1	1	0	0	0	151.5	61.5	26.7948	1	170.5	67	103.5	5.71	4.78	1.13	1.31	2.91	62.1	4.2	264	0.45	0.44	445	0
1	68	1	1	0	0	0	148.5	55.6	25.2128	1	141.5	67.5	74	4.92	5.18	1.14	1.36	3.29	58.7	6.8	289	0.62	0.062	341	0
0	68	1	1	1	0	1	168	85	30.1162	2	167.5	92	75.5	5.78	4.58	1.48	1.08	2.83	105.2	7.4	425	0.704	1.059	881.5	1
0	68	1	1	1	0	1	169.5	73.5	25.5828	1	200.5	104	96.5	9.51	4.83	1.6	1.47	2.98	85.3	6.4	340	1.32	0.8	1060	1
0	68	1	1	1	0	0	164.5	72.7	26.866	1	152	88.5	63.5	9.41	4.94	2.51	0.94	3.03	89.9	4.9	341	0.84	0.71	775	0
0	68	1	0	1	0	1	156	61.1	25.1068	1	136.5	69.5	67	5.13	4.98	0.78	1.44	3.26	79.2	6.8	331	0.64	0.71	675	0
1	68	1	1	1	0	0	149	61.1	27.5213	1	164	78	86	10.72	8.02	1.22	1.88	5.82	69.1	7.3	200	0.815	0.989	902	0
1	68	1	1	1	0	0	157.5	70.8	28.5412	2	131	78.5	52.5	7.15	6.24	2.45	1.44	3.95	58.6	5	335	0.62	0.88	750	0
1	68	1	1	1	0	0	153	66.3	28.3224	2	148	75	73	6.36	3.53	1.88	0.89	2.03	80.8	4.4	381	0.661	0.839	750	0
1	68	1	1	1	0	0	154.5	52.3	21.9101	0	149	85	64	6.39	5.85	0.96	2	3.56	47.4	6.1	233	0.88	0.81	845	0
1	68	1	1	1	0	0	158	71.2	28.5211	2	173	97	76	7.77	6.35	2.3	1.54	4.05	60.9	6.4	356	0.765	0.81	787.5	0
1	68	1	1	1	0	0	154.5	55	23.0412	0	161	79.5	81.5	6	5.79	0.94	1.15	3.53	63.6	4.5	352	0.89	0.8	845	0
1	68	1	1	1	0	0	149	60.9	27.4312	1	152	80	72	10.28	6.07	1.23	1.14	4.32	69.5	7.7	444	0.673	0.773	723	0
1	68	1	1	1	0	0	150.5	58.5	25.8275	1	139	80	59	13.25	4.49	2	0.96	2.54	66.3	3.2	232	0.86	0.746	803	0
1	68	1	0	1	0	0	156.5	88.4	36.093	2	133	72	61	8.84	4.04	1.68	1.18	2.21	89.8	6.8	421	0.62	0.71	665	0
1	68	1	1	1	0	0	155.5	57.5	23.7797	0	196.5	88.5	108	6.41	5.88	3.05	1.43	3.43	71.3	5.6	225	0.539	0.67	604.5	0
1	68	1	0	1	0	0	150	60	26.6667	1	137	79	58	7.86	4.22	4.14	0.73	1.97	49.4	5.1	374	0.602	0.636	619	0
1	68	1	1	1	0	0	154	77.7	32.7627	2	165.5	76	89.5	7.31	6.07	3.82	1.54	3.24	121.4	8	425	0.89	0.62	755	0
1	68	1	1	1	0	0	155	62.8	26.1394	1	179	73	106	6.09	6.14	1.93	1.3	4.12	64.2	4.7	321	0.4	0.62	510	0
1	68	1	1	1	0	0	152.5	61	26.2295	1	141	73.5	67.5	7.25	4.72	1.99	1.42	2.73	70	6.8	261	0.591	0.592	591.5	0
1	68	1	1	1	0	0	149.5	62.1	27.7849	1	150	73.5	76.5	5.63	3.91	0.77	1.76	1.83	68.4	4.9	228	0.657	0.588	622.5	0
1	68	1	1	1	0	0	149	55.5	24.9989	1	130.5	76	54.5	7.02	5.32	1.91	1.15	3.4	55.2	3.5	296	0.47	0.54	505	0
0	67	1	1	0	1	1	169	73.1	25.5943	1	185.5	97	88.5	5.83	4.29	0.53	1.32	2.69	72.1	4.1	339	0.83	1.053	941.5	1
0	67	1	1	0	1	1	155.5	53.9	22.2909	0	170	90	80	5	4.41	0.6	1.81	2.24	73.4	7.1	146	1.186	1.025	1105.5	1
0	67	1	1	0	1	1	158	50.3	20.149	0	145.5	85.5	60	4.63	5.15	0.85	1.19	3.45	78.4	6.4	317	1.01	0.93	970	1
0	67	1	1	0	1	1	166.5	86.9	31.3467	2	176	85.5	90.5	6.81	4.59	1.17	1.06	3.05	89.7	9	391	1.047	0.914	980.5	1
0	67	1	1	0	1	1	176	86.5	27.9248	1	168	101	67	5.96	4.49	0.99	1.53	2.46	85.5	5	383	1.06	0.89	975	1
0	67	1	1	0	1	0	176	83.4	26.9241	1	229	118	111	5.14	4.79	1.38	1.13	3	105.9	6.8	327	1.08	0.88	980	1
0	67	1	1	0	1	1	165.5	54.1	19.7516	0	142	80	62	5.36	5.59	0.85	2.06	3.29	76	7.6	192	1.06	0.71	885	1
0	67	1	1	0	1	1	158	66.5	26.6384	1	200	112.5	87.5	3.64	4.17	0.54	1.57	2.28	104.6	7	391	0.73	0.97	850	0
0	67	1	1	0	1	0	159.5	75.4	29.6381	2	186.5	88.5	98	5.99	5.16	1.31	1.06	3.4	80.5	5.6	254	0.71	0.97	840	0
0	67	1	1	0	1	1	162	94.9	36.1606	2	163.5	96.5	67	4.61	5.48	0.98	1.31	3.89	100.1	7.1	439	0.946	0.942	944	0
0	67	1	1	0	1	0	163	74.2	27.9273	1	143.5	72.5	71	4.9	3.47	0.69	1.31	2	81.4	5.8	384	0.716	0.919	817.5	0
0	67	1	1	0	1	1	168	77.6	27.4943	1	156.5	88	68.5	5.58	5.91	0.91	1.34	4.18	112.3	9.8	422	0.937	0.909	923	0
0	67	1	0	0	1	0	167	54.9	19.6852	0	115	76	39	5.07	4.88	0.46	1.83	2.98	81.2	8.8	294	0.71	0.87	790	0
0	67	1	1	0	1	1	162.5	57.5	21.7751	0	172	90	82	5.54	3.95	0.73	1.77	1.86	75.5	6	248	0.8	0.86	830	0
0	67	1	1	0	1	1	169	58.7	20.5525	0	144.5	83	61.5	4.88	5.1	0.4	2.19	2.69	73.9	9.5	229	0.709	0.839	774	0
0	67	1	1	0	1	1	164.5	64.9	23.9835	0	149	90	59	5.24	3.37	1.32	0.83	2.04	74.2	4.5	431	0.9	0.81	855	0
0	67	1	1	0	1	1	169.5	58.6	20.3966	0	140.5	75	65.5	4.41	5.99	1.3	1.36	4.26	81.3	4.8	289	0.71	0.81	760	0
0	67	1	0	0	1	1	155	51.3	21.3528	0	132.5	76	56.5	5.6	4.03	0.4	1.97	1.89	60.6	5.9	231	0.67	0.81	740	0
0	67	1	0	0	1	1	166	56.1	20.3585	0	129.5	79	50.5	4.96	5.28	0.89	1.39	3.47	78.2	6.1	246	0.707	0.803	755	0
0	67	1	1	0	1	1	175.5	72.5	23.5388	0	154	93.5	60.5	5.59	4.23	0.52	1.91	2.2	76.6	8	287	0.71	0.8	755	0
0	67	1	1	0	1	1	174.5	79.2	26.0096	1	176	97	79	5.39	5.52	1.03	1.55	3.66	75.6	7.3	305	0.71	0.8	755	0
0	67	1	1	0	1	1	162.5	81.7	30.9396	2	139	80	59	5.23	4.14	1.63	0.79	2.67	90.4	7.6	437	0.65	0.8	725	0
0	67	1	1	0	1	1	165	53.7	19.7245	0	165.5	95	70.5	5.42	4.75	0.49	2.37	2.22	71	4.8	173	0.59	0.8	695	0
0	67	1	1	0	1	1	166	60.4	21.919	0	153	76	77	5.47	5.5	1.22	1.58	3.55	89.6	8.2	357	0.695	0.795	745	0
0	67	1	1	0	1	1	161	61.9	23.8803	0	147.5	97	50.5	5.2	5.34	1.37	1.48	3.43	73.1	4.8	233	0.861	0.786	823.5	0
0	67	1	0	0	1	1	168.5	50.6	17.8218	0	109	69	40	5.04	6.75	0.83	1.62	4.98	71.1	4.4	347	0.64	0.78	710	0
0	67	1	1	0	1	1	168	74.1	26.2543	1	133	85.5	47.5	5.76	4.78	2.07	0.86	2.85	81	6.6	298	0.501	0.774	637.5	0
0	67	1	1	0	1	1	162	54.8	20.881	0	226	136	90	5.88	7.05	2.38	1.66	4.56	97.5	5.2	402	0.648	0.742	695	0
0	67	1	1	0	1	1	174	83.5	27.5796	1	142	77	65	5.45	5.53	1.04	1.37	3.79	71.5	4	276	0.771	0.732	751.5	0
0	67	1	1	0	1	0	170.5	72.4	24.9052	1	147.5	72.5	75	5.91	5.08	0.73	1.71	3.09	83.7	4.8	328	0.669	0.732	700.5	0
0	67	1	0	0	1	0	172	59.1	19.977	0	126	75	51	5.44	6.01	1.12	1.45	4.14	56.8	3.2	371	0.8	0.73	765	0
0	67	1	1	0	1	1	170.5	86.2	29.6523	2	142	83	59	6.74	5.92	2.84	1.1	4	102.7	5.6	376	0.8	0.73	765	0
0	67	1	0	0	1	0	165.5	70.9	25.8851	1	136	88	48	5.66	4.91	3.84	0.81	2.75	95.6	5.6	454	0.771	0.73	750.5	0
0	67	1	1	0	1	1	172	78.7	26.6022	1	165	107	58	4.78	5.82	1.28	1.35	3.88	84.2	4.9	271	0.67	0.73	700	0
0	67	1	1	0	1	1	173	56.6	18.9114	0	156.5	104	52.5	5.13	5.08	1.02	1.78	3.1	77.5	4.2	273	0.8	0.71	755	0
0	67	1	1	0	1	1	171.5	75.9	25.8056	1	133.5	79.5	54	5.16	4.54	0.93	1.05	3.03	72.9	6.1	239	0.79	0.71	750	0
0	67	1	1	0	1	1	168	68.2	24.1638	1	161	80	81	4.51	4.72	0.99	1.92	2.45	80.2	5	358	0.75	0.71	730	0
0	67	1	1	0	1	1	165.5	70	25.5565	1	162	86.5	75.5	5.53	3.95	1.81	0.97	2.07	76.3	5	371	0.71	0.71	710	0
0	67	1	0	0	1	1	177.5	71.2	22.5987	0	119.5	82	37.5	4.43	5.93	2.31	1.03	3.99	67.9	4.8	426	0.62	0.71	665	0
0	67	1	1	0	1	0	168.5	77.3	27.2257	1	160.5	81	79.5	5.43	4.16	2.22	0.96	2.27	83.3	6.2	387	0.895	0.702	798.5	0
0	67	1	0	0	1	1	176.5	60.4	19.3886	0	123.5	83	40.5	6.33	3.59	0.8	1.24	1.82	69.3	4.7	246	0.679	0.689	684	0
0	67	1	0	0	1	1	166	66.3	24.0601	1	134.5	88.5	46	6.33	4.72	1.29	1.43	2.66	79.2	5.1	325	0.483	0.685	584	0
0	67	1	1	0	1	1	167.5	64.8	23.0965	0	129	89	40	5.8	5.57	1.71	1.46	3.15	155.3	10.1	623	0.661	0.658	659.5	0
0	67	1	1	0	1	1	165	72.7	26.7034	1	196	110	86	6.9	5.4	1.35	1.62	3.3	78.1	5.1	279	0.8	0.62	710	0
0	67	1	1	0	1	1	164	65.2	24.2415	1	165	93.5	71.5	6.11	4.53	0.92	1.05	3.08	99.4	4.7	393	0.73	0.62	675	0
0	67	1	1	0	1	0	170	62.5	21.6263	0	155.5	97.5	58	5.11	5.02	2.17	1.15	2.93	60	4.1	278	0.71	0.62	665	0
0	67	1	1	0	1	1	164.5	67.8	25.0552	1	193.5	88	105.5	5.35	4.89	1.99	1.21	2.84	87.5	4.1	309	0.71	0.62	665	0
0	67	1	1	0	1	1	172.5	61.1	20.5335	0	163	93	70	5.12	5.14	0.79	2.03	3.02	75	6.1	405	0.62	0.62	620	0
0	67	1	1	0	1	0	162	61.8	23.5482	0	143	73.5	69.5	6.26	4.07	1.11	1.1	2.33	83	6.6	272	0.62	0.62	620	0
0	67	1	0	0	1	1	171	53.6	18.3304	0	117.5	74	43.5	4.97	4.08	0.45	1.49	2.29	66.2	8	366	0.54	0.62	580	0
0	67	1	1	0	1	0	163	51.7	19.4588	0	170	88.5	81.5	4.56	4.41	1.23	1.19	2.66	72	3.2	317	0.54	0.62	580	0
0	67	1	1	0	1	0	172	81.7	27.6163	1	149.5	95	54.5	6.09	5.8	1.78	0.92	4.16	124.2	7.2	431	0.5	0.618	559	0
0	67	1	1	0	1	1	163	60.3	22.6956	0	147.5	88.5	59	6.25	4.32	0.59	1.86	2.32	76.6	5.8	239	0.605	0.613	609	0
0	67	1	1	0	1	1	153	55.3	23.6234	0	154.5	93	61.5	5.61	4.96	0.61	2.8	2.09	76.6	7.7	353	0.502	0.583	542.5	0
0	67	1	0	0	1	1	169	69.7	24.4039	1	133.5	72.5	61	4.29	4.76	0.91	1.17	3.19	83.8	5.1	267	0.792	0.572	682	0
0	67	1	1	0	1	0	164.5	73.3	27.0877	1	#NULL!	#NULL!	#NULL!	6.14	4.83	2	1.1	3.13	69.7	3.8	393	0.47	0.55	510	0
0	67	1	1	0	1	1	162.5	70.5	26.6982	1	160.5	89.5	71	5.14	4.27	1.07	1.81	1.97	78.9	7.8	244	0.54	0.54	540	0
0	67	1	1	0	1	1	166.5	62.4	22.509	0	154	88	66	4.79	4.91	1.35	1.09	3.25	68.4	4.5	315	0.89	0.53	710	0
0	67	1	0	0	1	1	168	62	21.9671	0	132.5	80.5	52	5.09	5.66	5.43	1.1	1.91	72	7.4	311	0.81	0.53	670	0
0	67	1	1	0	1	1	155	61.1	25.4318	1	161.5	100	61.5	6.01	5.24	0.58	1.48	3.46	82.4	5.5	261	0.73	0.53	630	0
0	67	1	0	0	1	1	178.5	56.6	17.764	0	108.5	64.5	44	4.19	3.7	0.6	1.6	1.78	73.4	3.8	276	0.51	0.48	495	0
1	67	1	1	0	1	0	158.5	63.2	25.157	1	219	106	113	5.78	6.42	1.22	1.66	4.39	61.9	7	405	0.718	0.762	740	0
1	67	1	1	0	1	0	156.5	71.6	29.2337	2	154	73	81	5.88	4.19	2.17	0.76	2.08	74.4	5.4	359	0.71	0.71	710	0
1	67	1	1	0	1	0	151.5	45.9	19.998	0	152.5	75.5	77	5.1	6.26	2.42	1.37	4.04	53.4	6.2	292	0.666	0.653	659.5	0
1	67	1	0	0	1	0	156	65.2	26.7916	1	132	67.5	64.5	4.93	3.39	1.21	0.98	1.8	56.6	4.3	238	0.53	0.54	535	0
0	67	1	1	1	1	1	176.5	103.5	33.2239	2	#NULL!	#NULL!	#NULL!	4.27	3.51	1.01	1.36	1.55	114.3	4.8	423	0.88	1.24	1060	1
0	67	1	1	1	1	0	162.5	79.8	30.2201	2	156	93	63	7.77	6.52	2.24	0.9	4.79	205.7	15	484	1.123	1.189	1156	1
0	67	1	1	1	1	1	160	71.7	28.0078	2	164.5	82	82.5	7.58	5.11	1.06	0.84	3.55	82.7	6.4	233	0.97	1.06	1015	1
0	67	1	1	1	1	1	160.5	65.9	25.582	1	147	82	65	7.6	4.69	0.78	1.24	3.06	60.8	5.4	146	1.06	0.79	925	1
0	67	1	1	1	1	0	163.5	76.3	28.5423	2	173	82.5	90.5	4.41	4.67	0.62	1.46	2.93	95.2	10.2	325	1.06	0.62	840	1
0	67	1	1	1	1	1	161	76.6	29.5513	2	175	93	82	10.09	4.12	0.85	1.48	2.23	79.6	5.4	276	0.79	0.93	860	0
0	67	1	1	1	1	1	172	86.1	29.1036	2	145.5	93.5	52	10.46	4.13	1.07	1.12	2.39	104.3	7.9	149	0.736	0.868	802	0
0	67	1	1	1	1	1	165	73.4	26.9605	1	153	75	78	9.36	4.39	1.35	1.14	2.82	62.8	5.2	287	0.54	0.71	625	0
0	67	1	1	1	1	1	168	71.9	25.4748	1	144.5	89	55.5	9.8	5.71	3.9	0.96	2.88	68.6	4.3	287	0.62	0.64	630	0
0	67	1	0	1	1	1	166.5	73.4	26.4769	1	138	81	57	10.1	4.04	3	1	1.79	76.2	5.6	307	0.62	0.62	620	0
0	67	1	1	1	1	1	171.5	78.3	26.6216	1	#NULL!	#NULL!	#NULL!	9.03	2.65	0.71	1.08	1.12	71.6	6.2	243	0.59	0.49	540	0
1	67	1	0	1	1	0	150	58.9	26.1778	1	125	74.5	50.5	7.58	4.76	1.22	1.55	2.75	60	5.8	350	0.778	0.676	727	0
0	67	1	0	0	0	0	157.5	62.9	25.3565	1	#NULL!	#NULL!	#NULL!	5.04	4.24	1.44	0.9	2.79	66.9	3.4	275	0.847	1.112	979.5	1
0	67	1	1	0	0	1	161.5	84.1	32.2442	2	176	99	77	6.97	5.18	1.39	1.5	3.22	73.8	5	183	0.81	0.84	825	0
0	67	1	1	0	0	0	172.5	66.4	22.3146	0	158.5	90.5	68	4.53	4.74	0.73	1.92	2.58	72.3	7.3	146	0.54	0.8	670	0
0	67	1	1	0	0	0	165	59.3	21.7815	0	172.5	94.5	78	6	4.32	0.93	1.69	2.48	78.9	5.8	270	0.812	0.777	794.5	0
0	67	1	1	0	0	0	168	53.4	18.9201	0	139	78	61	4.83	4.03	0.69	1.69	1.99	82.6	8	328	0.619	0.746	682.5	0
0	67	1	1	0	0	0	165.5	67.6	24.6803	1	140.5	79	61.5	4.85	5.86	0.69	1.7	3.79	68.7	5.4	263	0.81	0.73	770	0
0	67	1	1	0	0	1	167	71.7	25.7091	1	147	79.5	67.5	5.64	4.24	0.55	1.48	2.44	65	5.6	206	0.607	0.711	659	0
0	67	1	1	0	0	1	157.5	64.2	25.8806	1	140	77.5	62.5	5.1	4.02	1.38	1.07	2.24	88.8	6	285	0.723	0.641	682	0
0	67	1	1	0	0	1	165.5	80.8	29.4995	2	152	93	59	4.97	4.37	1.07	1.02	2.88	78.1	5	379	0.54	0.62	580	0
0	67	1	1	0	0	0	164	59.9	22.271	0	145	79	66	5.27	5.51	1.27	1.47	3.46	84.6	3.7	330	0.47	0.53	500	0
1	67	1	1	0	0	0	152.5	65	27.9495	1	213.5	116	97.5	6.06	5.91	0.96	1.5	4.12	71.2	5.3	262	0.89	1.15	1020	1
1	67	1	1	0	0	0	150.5	51	22.5163	0	#NULL!	#NULL!	#NULL!	5.05	6.69	2.04	2.02	3.74	53.5	3.9	155	0.99	1.12	1055	1
1	67	1	0	0	0	0	150	57.7	25.6444	1	136.5	80.5	56	5.01	5.26	1.39	1.18	3.79	58.9	4.9	118	1.132	0.82	976	1
1	67	1	1	0	0	0	152	59.4	25.7098	1	167.5	102	65.5	4.81	4.94	1.56	1.21	3.09	53.6	4.3	192	1.07	0.67	870	1
1	67	1	1	0	0	0	149.5	57.4	25.682	1	159.5	76	83.5	5.52	4.95	1.19	1.67	3.44	55.7	5.2	304	0.902	0.995	948.5	0
1	67	1	0	0	0	0	158	63	25.2363	1	135	72.5	62.5	5.34	5.96	1.18	1.21	4.24	57.8	5.9	187	0.649	0.985	817	0
1	67	1	1	0	0	0	164.5	78.3	28.9354	2	146.5	78	68.5	5.91	5.02	0.96	1.21	3.31	74.9	5.7	255	0.53	0.97	750	0
1	67	1	1	0	0	0	140.5	59.8	30.2934	2	149	73.5	75.5	5.13	4.24	0.79	1.69	2.14	58.1	5.5	352	0.777	0.967	872	0
1	67	1	0	0	0	0	153.5	67.5	28.6475	2	130	78	52	5.26	6.12	2.79	1.09	3.97	74.5	5.5	267	0.807	0.954	880.5	0
1	67	1	1	0	0	0	161.5	56.7	21.7389	0	154	80	74	6.71	4.8	1.97	1.61	2.44	62.4	4.7	286	0.71	0.92	815	0
1	67	1	1	0	0	0	153.5	64.3	27.2894	1	137	77	60	6.13	5.32	2.3	1.1	3.33	53.1	4.2	334	0.998	0.917	957.5	0
1	67	1	0	0	0	0	148	54.4	24.8356	1	139	78	61	3.95	5.39	1.3	2.06	3.06	63.9	5.1	298	0.608	0.902	755	0
1	67	1	1	0	0	0	155	52.5	21.8522	0	148.5	82.5	66	4.53	5.19	0.89	1.6	3.26	56.8	3.4	200	0.723	0.894	808.5	0
1	67	1	1	0	0	0	157	80.5	32.6585	2	147	52	95	5.21	5.19	1.05	1.5	3.36	60.8	3.8	319	0.97	0.89	930	0
1	67	1	1	0	0	0	161	59.4	22.9158	0	183.5	94	89.5	5.82	2.89	0.4	1.27	1.56	52.8	5.8	211	0.89	0.89	890	0
1	67	1	1	0	0	0	#NULL!	#NULL!	#NULL!	#NULL!	133	70	63	4.88	4.14	1.07	1.53	2.1	68.9	7	220	0.71	0.88	795	0
1	67	1	1	0	0	0	159	75.3	29.7852	2	140	71.5	68.5	5.67	5.27	1.69	1.19	3.49	58.6	5.6	258	0.71	0.88	795	0
1	67	1	0	0	0	0	158.5	61.5	24.4803	1	134	88	46	6.95	5.66	3.94	0.95	3.67	66.6	6.4	268	0.889	0.843	866	0
1	67	1	1	0	0	0	150	61.8	27.4667	1	161.5	100	61.5	5.08	5.08	2.16	0.92	3.27	69.1	5.8	227	0.64	0.81	725	0
1	67	1	1	0	0	0	162	68.7	26.1774	1	180	84	96	5.82	4.65	1.29	1.25	3.05	57.3	4.6	261	0.71	0.8	755	0
1	67	1	1	0	0	1	156.5	57.4	23.436	0	148	89	59	5.72	6.02	1.23	1.85	3.79	62.3	5	187	0.79	0.79	790	0
1	67	1	0	0	0	0	151	48.2	21.1394	0	111.5	67	44.5	4.43	5.04	0.74	1.34	3.36	60.4	5.7	316	0.71	0.79	750	0
1	67	1	1	0	0	0	146.5	60.1	28.0027	2	130	80.5	49.5	5.79	4.5	1.11	2.2	3.32	84.2	5.2	480	0.832	0.787	809.5	0
1	67	1	1	0	0	0	156	53.8	22.1072	0	130	81	49	5.42	2.89	1.28	0.79	1.57	58.6	7.2	329	0.8	0.77	785	0
1	67	1	1	0	0	0	160	76.7	29.9609	2	150	83.5	66.5	5.33	5.66	1.13	1.36	3.92	56	4.4	192	0.561	0.748	654.5	0
1	67	1	1	0	0	0	160.5	70.3	27.2901	1	160	90	70	6.35	8.48	5.33	1.19	4.74	68.4	5.8	374	0.954	0.745	849.5	0
1	67	1	1	0	0	0	151.5	57	24.8342	1	173	104.5	68.5	5.99	5.08	1.99	1.57	2.83	60.2	6.3	219	0.727	0.742	734.5	0
1	67	1	1	0	0	0	160	68	26.5625	1	140.5	82	58.5	6.06	4.86	2.4	1.29	2.77	68.2	6.4	430	0.676	0.734	705	0
1	67	1	1	0	0	0	136	44.1	23.843	0	171	98.5	72.5	5.38	4.84	1.23	1.25	2.6	66.6	6.7	241	0.53	0.73	630	0
1	67	1	1	0	0	0	157	46.3	18.7837	0	162	85	77	6.18	5.43	1.68	1.24	3.47	62.6	3.6	181	0.723	0.72	721.5	0
1	67	1	0	0	0	0	148.5	58.8	26.6639	1	119	67	52	5.05	4.83	1.81	1.43	2.91	78.5	4.5	293	0.661	0.715	688	0
1	67	1	1	0	0	0	155.5	83.3	34.4496	2	169.5	80	89.5	6.47	5.42	1.9	1.12	3.57	70.4	4.3	204	0.9	0.71	805	0
1	67	1	0	0	0	0	151	61.3	26.8848	1	126	76.5	49.5	5.34	5.99	0.83	1.75	3.9	54.9	9.2	274	0.89	0.71	800	0
1	67	1	1	0	0	0	153.5	52.3	22.1965	0	148	69.5	78.5	4.93	5.54	1.02	2.29	2.97	55.5	4.4	196	0.88	0.71	795	0
1	67	1	1	0	0	1	151.5	59.2	25.7927	1	136.5	69	67.5	5.07	4.4	0.63	1.6	2.52	53.9	4.3	251	0.71	0.71	710	0
1	67	1	1	0	0	0	153	63.4	27.0836	1	201	86.5	114.5	5.12	4	0.81	1.44	2.24	61.6	4.3	187	0.71	0.71	710	0
1	67	1	1	0	0	0	156	67	27.5312	1	149.5	78	71.5	6.12	5.26	2.22	0.89	3.35	64.4	5.9	414	0.71	0.71	710	0
1	67	1	1	0	0	0	148	46.5	21.229	0	138.5	77	61.5	4.7	3.59	1.09	1.35	1.64	74.9	7.3	341	0.64	0.71	675	0
1	67	1	1	0	0	0	157	65.7	26.6542	1	142.5	81.5	61	5.86	3.91	3.12	1	1.62	66.2	5.9	203	0.51	0.71	610	0
1	67	1	1	0	0	0	149	59.8	26.9357	1	150	77	73	4.45	4.72	1.77	1.23	2.76	57.9	3.7	270	0.717	0.685	701	0
1	67	1	0	0	0	0	160	66.6	26.0156	1	119	77.5	41.5	5.88	4.6	1	1.57	2.62	66.5	3.7	246	0.668	0.68	674	0
1	67	1	1	0	0	0	147	55.1	25.4986	1	143.5	83	60.5	6.11	6.31	1.92	1.42	4.3	56.3	5.5	192	0.535	0.669	602	0
1	67	1	1	0	0	0	155	66.3	27.5963	1	157	85.5	71.5	5.44	5.44	2.15	1.2	3.9	50.9	5.3	197	0.71	0.66	685	0
1	67	1	0	0	0	0	141.5	37.8	18.879	0	125	63.5	61.5	5.02	5.34	1.36	1.71	3.04	52.8	4.5	318	0.686	0.645	665.5	0
1	67	1	0	0	0	0	145.5	47.5	22.4371	0	129	71.5	57.5	6.8	6.64	1.56	1.47	3.92	62.6	5	217	0.54	0.64	590	0
1	67	1	1	0	0	0	155	65.6	27.3049	1	157.5	107.5	50	6.78	4.27	0.92	1.42	2.63	58.9	4.9	278	0.571	0.634	602.5	0
1	67	1	1	0	0	0	153	66	28.1943	2	152	92.5	59.5	4.96	6.81	1.67	1.59	4.81	68.6	6.8	281	0.655	0.633	644	0
1	67	1	1	0	0	0	155.5	48.5	20.0577	0	146	87	59	4.41	4.82	0.82	1.41	3.04	69.7	7	181	0.88	0.62	750	0
1	67	1	1	0	0	0	156.5	44.2	18.0465	0	174.5	103	71.5	6.06	5.37	0.96	2.07	2.91	61.8	5.6	150	0.84	0.62	730	0
1	67	1	1	0	0	0	161	75	28.9341	2	160.5	75.5	85	4.79	4.96	1.03	1.61	2.97	64.2	6.4	383	0.8	0.62	710	0
1	67	1	0	0	0	0	159	53.1	21.0039	0	131	64.5	66.5	4.98	4.18	0.61	1.54	2.5	66.8	5.2	203	0.71	0.62	665	0
1	67	1	1	0	0	0	161	82.7	31.9046	2	141.5	108.5	33	5.39	4.84	2.09	1.08	2.98	59.5	3.8	306	0.71	0.62	665	0
1	67	1	1	0	0	0	142.5	50.6	24.9184	1	144.5	60	84.5	5.23	5.92	0.84	1.88	3.62	51.6	7.6	267	0.62	0.62	620	0
1	67	1	1	0	0	0	154.5	66.9	28.0265	2	197	86.5	110.5	4.93	5.56	2.31	1.24	3.32	86.2	5.4	402	0.62	0.62	620	0
1	67	1	1	0	0	0	162	84.3	32.1216	2	139.5	71	68.5	4.88	4.14	2.33	0.91	2.05	56.3	4.5	242	0.62	0.62	620	0
1	67	1	1	0	0	0	157	67	27.1816	1	141	93	48	5.5	5.25	1.78	1.31	2.29	75.9	4.9	463	0.54	0.62	580	0
1	67	1	1	0	0	0	160.5	77.9	30.2404	2	157.5	75.5	82	6.67	6.18	2.3	1.31	4.25	66.3	5.7	284	0.54	0.62	580	0
1	67	1	1	0	0	0	151.5	69.5	30.2803	2	143	62.5	80.5	5.01	4.73	1.47	1.07	3.04	70.5	5	135	0.53	0.62	575	0
1	67	1	1	0	0	0	164	70.1	26.0634	1	143	77	66	4.9	6.15	5.08	1.01	2.99	58.7	4.9	257	0.742	0.582	662	0
1	67	1	1	0	0	0	150.5	68.2	30.11	2	148	85.5	62.5	5.08	3.93	1.74	1.18	1.89	75.9	5.9	300	0.611	0.551	581	0
1	67	1	0	0	0	0	154	61.4	25.8897	1	129.5	71.5	58	5.51	6.35	1.28	1.36	3.41	48.1	5	201	0.81	0.54	675	0
1	67	1	1	0	0	0	155.5	60	24.8136	1	147.5	102	45.5	5.18	5.46	0.76	2.38	2.86	67.8	7.7	243	0.62	0.54	580	0
1	67	1	0	0	0	0	162.5	67.4	25.5243	1	137.5	66	71.5	5.1	7.14	1.55	1.31	5.13	57.3	3.3	219	0.71	0.53	620	0
1	67	1	1	0	0	0	145	47.5	22.5922	0	163	59	104	6.32	5.49	1.59	1.45	3.38	62.1	4.1	309	0.53	0.53	530	0
1	67	1	0	0	0	0	159.5	64.9	25.5108	1	136.5	74.5	62	5.21	5.41	1	1.42	3.62	57.3	4.1	267	0.692	0.517	604.5	0
1	67	1	1	0	0	0	160	57	22.2656	0	141	81.5	59.5	4.82	3.88	0.82	1.23	2.35	56.3	4	137	0.53	0.45	490	0
1	67	1	0	1	0	0	144.5	58.6	28.0648	2	133.5	73	60.5	8.7	6.71	2.34	1.35	4.6	55.8	4.5	280	0.755	1.103	929	1
1	67	1	1	1	0	0	158	53.9	21.5911	0	127.5	68	59.5	7.22	6.02	1.24	1.45	3.9	64.9	7.7	265	0.925	1.009	967	1
1	67	1	1	1	0	0	150.5	54.8	24.194	1	196.5	104	92.5	8.25	6.13	1.92	1.26	4	45.2	4.6	201	0.871	1.009	940	1
1	67	1	1	1	0	0	156.5	76.8	31.3569	2	199.5	89.5	110	6.78	6.46	1.87	1.14	4.56	64.4	5	346	0.89	0.89	890	0
1	67	1	1	1	0	0	153	65.1	27.8098	1	149.5	84.5	65	6.88	5.28	1.36	1.32	3.42	71.1	4.9	305	0.79	0.81	800	0
1	67	1	1	1	0	0	150.5	58.4	25.7834	1	157	71	86	8.9	6.24	1.86	0.96	4.45	52.8	5.2	222	0.81	0.8	805	0
1	67	1	1	1	0	0	159.5	68.1	26.7686	1	155	99.5	55.5	6.92	5.17	1.32	1.11	3.48	72	7.3	316	0.62	0.8	710	0
1	67	1	1	1	0	1	157.5	50.4	20.3175	0	186.5	94.5	92	7.15	5.62	0.92	2.47	2.94	52.1	5	164	0.8	0.79	795	0
1	67	1	1	1	0	0	155	75.1	31.2591	2	190.5	109	81.5	6.16	4.86	1.59	1.5	2.75	66.8	7.2	353	0.66	0.77	715	0
1	67	1	1	1	0	0	156.5	64.8	26.4573	1	152.5	78.5	74	7.61	4.25	1.57	1.68	2.13	54.4	3.8	167	0.62	0.756	688	0
1	67	1	1	1	0	1	152.5	54.6	23.4776	0	143	76	67	6.31	4.76	0.87	2.31	2.24	59.7	4.8	305	0.886	0.743	814.5	0
1	67	1	1	1	0	0	158.5	74.4	29.6152	2	128	68	60	6.54	5.88	2.37	0.9	3.91	51.5	3.5	166	0.764	0.731	747.5	0
1	67	1	1	1	0	0	165.5	55.7	20.3357	0	136	68	68	9.86	4.84	1.26	1.64	2.68	93.6	5.9	298	0.75	0.73	740	0
1	67	1	1	1	0	0	156.5	66.2	27.029	1	125	75	50	6.39	4.52	0.93	1.36	2.83	65.5	5.8	283	0.62	0.71	665	0
1	67	1	1	1	0	0	158	55.3	22.1519	0	183.5	101.5	82	7.77	6.57	2.2	1.5	4.47	76.3	5.6	441	0.44	0.71	575	0
1	67	1	0	1	0	0	159.5	48.6	19.1036	0	127.5	64	63.5	7.37	5.25	0.88	1.56	3.5	57.3	4.5	195	0.36	0.71	535	0
1	67	1	1	1	0	0	156.5	66.6	27.1923	1	197	103	94	5.02	4.16	1.59	0.93	2.47	47.3	5.9	202	0.88	0.62	750	0
1	67	1	1	1	0	0	163	69.7	26.2336	1	139	89	50	6.54	7.78	1.39	1.36	5.98	72.3	5.6	217	0.56	0.62	590	0
1	67	1	1	1	0	0	152	68.4	29.6053	2	180	80	100	8.82	7.1	1.14	1.8	4.95	85.9	7.6	239	0.54	0.62	580	0
1	67	1	1	1	0	0	159	55.5	21.9532	0	141.5	69.5	72	5.09	4.82	0.92	1.42	3.21	58.1	5.2	259	0.586	0.588	587	0
1	67	1	1	1	0	0	156	66.9	27.4901	1	158	89	69	9.17	3.84	2.64	1.08	1.64	52.3	3.9	203	0.591	0.577	584	0
1	67	1	1	1	0	0	153.5	50.7	21.5175	0	154	90	64	7.95	5.08	1.85	1.71	2.72	60.2	5.5	275	0.62	0.54	580	0
1	67	1	1	1	0	0	153	68.1	29.0914	2	158	79.5	78.5	7.41	6.69	2.01	1.59	4.41	65.5	5.3	239	0.571	0.519	545	0
1	67	1	1	1	0	0	158	72	28.8415	2	156.5	77	79.5	7.88	4.48	1.33	1.04	2.92	57.3	3.3	291	0.556	0.506	531	0
1	67	1	1	1	0	0	155	79.8	33.2154	2	141	76	65	4.63	6.43	1.86	1.16	4.27	61.6	6.1	212	0.64	0.44	540	0
1	67	1	0	1	0	0	165.5	68.2	24.8994	1	135	71	64	11.38	5.57	1.34	1.33	3.69	64	5.3	270	0.53	0.44	485	0
0	66	1	1	0	1	1	172.5	85.3	28.6662	2	#NULL!	#NULL!	#NULL!	6.06	5.77	1.69	0.96	4.08	73.8	6.1	292	1.12	1.06	1090	1
0	66	1	1	0	1	1	171.5	74.4	25.2956	1	129	67	62	5.08	4.52	1.04	0.77	3.12	92.7	5.3	372	1.158	0.927	1042.5	1
0	66	1	1	0	1	1	155	71.8	29.8855	2	180	91	89	5.63	5.22	0.75	1.78	3.33	65.7	4.5	281	1.394	0.582	988	1
0	66	1	1	0	1	1	172	70.1	23.6952	0	156	91	65	5.41	5.25	1.08	1.76	3.3	54.1	5.8	255	0.992	0.913	952.5	0
0	66	1	1	0	1	1	168.5	90.8	31.9806	2	150.5	76.5	74	5.83	5.85	2.15	0.84	3.88	80.5	5.4	312	1	0.9	950	0
0	66	1	1	0	1	0	163.5	64.5	24.1282	1	148.5	92.5	56	5.4	4.8	0.73	2.09	2.53	60.4	5.8	196	0.56	0.9	730	0
0	66	1	1	0	1	0	170.5	74.2	25.5244	1	174	81.5	92.5	6.52	5.22	0.76	1.3	3.59	121	11.3	479	0.9	0.88	890	0
0	66	1	1	0	1	1	167	72.3	25.9242	1	156.5	93.5	63	4.71	4.78	1.21	1.16	3.05	104.3	5.5	329	0.67	0.863	766.5	0
0	66	1	1	0	1	1	159	45.1	17.8395	0	157	101	56	5.8	3.99	0.49	1.78	1.98	62.4	4.4	235	0.71	0.82	765	0
0	66	1	1	0	1	1	156.5	63.5	25.9266	1	146.5	77	69.5	4.68	4.16	1	0.95	2.59	81.1	10.2	255	0.71	0.81	760	0
0	66	1	1	0	1	1	176.5	87.1	27.9595	1	181.5	98.5	83	5.92	5.74	1.12	1.2	4.05	64.6	5.5	257	0.97	0.8	885	0
0	66	1	1	0	1	0	170.5	77	26.4876	1	156.5	82	74.5	5.74	4.08	0.46	1.38	2.54	68.6	7.2	195	0.88	0.8	840	0
0	66	1	1	0	1	1	167	72.6	26.0318	1	148	84	64	4.75	3.15	0.9	1.49	1.05	68.6	5.1	318	0.87	0.8	835	0
0	66	1	0	0	1	1	175	65.8	21.4857	0	120	70	50	5.03	4.67	0.76	1.23	3.08	65.1	5	241	0.75	0.8	775	0
0	66	1	1	0	1	1	167	73.6	26.3903	1	161	93	68	4.87	3.54	1.73	0.82	2.08	68.4	5.4	250	0.71	0.8	755	0
0	66	1	0	0	1	1	173	81	27.0641	1	136	71.5	64.5	4.9	4.09	1.47	0.88	2.52	59.5	4	283	0.62	0.8	710	0
0	66	1	0	0	1	0	172	52.9	17.8813	0	#NULL!	#NULL!	#NULL!	5.37	4.05	0.76	1.4	2.15	86.7	8.3	410	0.555	0.795	675	0
0	66	1	0	0	1	1	#NULL!	#NULL!	#NULL!	#NULL!	#NULL!	#NULL!	#NULL!	5.85	4.11	1.09	1.09	2.61	63.6	7	392	0.97	0.79	880	0
0	66	1	1	0	1	1	166	70.3	25.5117	1	158	79	79	4.91	5.7	1.69	1.02	4.05	74.6	7.4	290	0.97	0.79	880	0
0	66	1	1	0	1	1	163.5	48.9	18.2925	0	147	71.5	75.5	5.21	4.79	0.68	1.89	3.14	58	6.3	339	0.73	0.79	760	0
0	66	1	1	0	1	0	168.5	58.8	20.7099	0	152.5	102.5	50	4.72	4.26	0.75	1.61	2.35	71.7	4.4	281	0.71	0.79	750	0
0	66	1	0	0	1	1	167	58.7	21.0477	0	129	71	58	4.88	4.36	0.6	1.49	2.56	61.8	7.3	256	0.71	0.79	750	0
0	66	1	1	0	1	0	165.5	67.7	24.7168	1	149	91	58	5.17	4.86	1.8	1.09	3.01	65.8	3.6	246	0.788	0.777	782.5	0
0	66	1	1	0	1	1	175.5	63.5	20.6167	0	130.5	85.5	45	5.03	4.37	1.02	1.91	2.05	86.2	6.2	369	0.755	0.751	753	0
0	66	1	1	0	1	1	174.5	71.9	23.6123	0	148.5	83.5	65	5.33	3.83	0.39	1.73	1.88	72.8	4.7	315	0.29	0.75	520	0
0	66	1	1	0	1	1	160.5	62.7	24.3398	1	142	79	63	4.89	4.96	1.73	0.99	3.32	76.1	5.9	318	0.93	0.73	830	0
0	66	1	1	0	1	1	164	73.1	27.1788	1	149	100	49	4.75	4.97	1	1.45	3.14	83.3	6.5	350	0.84	0.71	775	0
0	66	1	0	0	1	0	162	67.1	25.5677	1	132	79	53	4.86	4.76	0.83	1.71	2.73	84.2	4.7	315	0.8	0.71	755	0
0	66	1	1	0	1	1	167	59.5	21.3346	0	158	99	59	5.15	4.98	0.72	1.97	2.79	104.6	6.3	359	0.79	0.71	750	0
0	66	1	1	0	1	0	157	61	24.7475	1	154.5	90	64.5	6.37	4.09	1.19	1.42	2.32	83.6	5.8	338	0.71	0.71	710	0
0	66	1	1	0	1	1	163	75.1	28.266	2	153	96.5	56.5	6.57	5.09	1.89	1.17	2.88	81	5	268	0.71	0.71	710	0
0	66	1	0	0	1	0	173	57.3	19.1453	0	119	70.5	48.5	4.83	4.37	1.29	1.56	2.25	72.2	7.3	223	0.64	0.71	675	0
0	66	1	1	0	1	1	173	76.7	25.6273	1	153.5	94	59.5	5.58	5.47	0.91	1.38	3.77	71.3	9.8	274	0.658	0.68	669	0
0	66	1	1	0	1	1	174	75	24.7721	1	148.5	81	67.5	5.41	4.44	1.75	1.05	2.59	72.1	4.5	395	0.553	0.673	613	0
0	66	1	1	0	1	1	170.5	99.5	34.2274	2	161	83.5	77.5	5.46	4.69	1.59	1.27	2.84	53.9	4.4	261	0.53	0.67	600	0
0	66	1	1	0	1	1	160.5	68.9	26.7466	1	154.5	92.5	62	4.87	4.95	1.84	1.13	3.05	73.7	4.3	330	0.806	0.665	735.5	0
0	66	1	0	0	1	1	161.5	65.8	25.2279	1	126.5	77.5	49	4.8	5.59	0.84	1.96	3.55	71.3	6.4	295	0.683	0.653	668	0
0	66	1	1	0	1	1	163	66.1	24.8786	1	165.5	100	65.5	6.54	5.84	1.59	1.08	4.14	80.7	5.7	357	0.92	0.639	779.5	0
0	66	1	1	0	1	0	155	56.2	23.3923	0	137.5	79	58.5	5.7	3.6	1.05	1.61	1.42	96.8	5.5	168	0.607	0.638	622.5	0
0	66	1	1	0	1	1	166.5	76.5	27.5952	1	124	75.5	48.5	5.27	2.95	0.56	1.04	1.38	75.3	6.8	215	0.79	0.62	705	0
0	66	1	1	0	1	1	168	60.9	21.5774	0	172.5	93	79.5	5.56	5.46	0.73	1.62	3.83	70.7	6	273	0.62	0.62	620	0
0	66	1	1	0	1	1	165	63.6	23.3609	0	148	76.5	71.5	5.33	4.72	0.5	1.77	2.73	93.3	6.8	337	0.62	0.62	620	0
0	66	1	1	0	1	1	170	74.4	25.7439	1	136.5	71	65.5	5.36	2.62	0.53	1.05	1.21	68.1	5.2	287	0.62	0.62	620	0
0	66	1	1	0	1	1	171.5	83.4	28.3555	2	157	88	69	4.56	3.21	2.03	0.71	1.68	78.4	3.8	338	0.852	0.602	727	0
0	66	1	1	0	1	1	180	73	22.5309	0	141	92	49	6.61	6	2.06	1.2	4.17	80.6	4.6	350	0.646	0.54	593	0
0	66	1	1	0	1	1	170.3	80.3	27.6877	1	152	88.5	63.5	5.31	4.95	1.3	1.08	3.42	89.1	4	327	0.62	0.54	580	0
0	66	1	1	0	1	1	161.5	63.7	24.4227	1	155.5	84	71.5	6.87	4.95	0.74	1.56	3.05	77.5	7.7	304	0.61	0.53	570	0
0	66	1	1	0	1	1	168	69.4	24.589	1	158	82	76	4.76	5.16	0.73	1.25	3.49	67.7	4.9	315	0.58	0.48	530	0
0	66	1	1	0	1	1	176	73.3	23.6635	0	147	87	60	4.98	4.83	1.1	1.12	3.27	86.3	6.8	260	0.53	0.44	485	0
0	66	1	1	0	1	1	163	57.7	21.717	0	136	77	59	5.87	5.53	0.68	1.82	3.45	71.6	6.7	335	0.49	0.44	465	0
0	66	1	0	0	1	1	165	58.4	21.4509	0	128.5	88.5	40	6.51	4.86	1.8	1.16	2.96	105.5	6.5	490	0.603	0.435	519	0
0	66	1	1	0	1	1	168	64.4	22.8175	0	183.5	110.5	73	5.76	4.63	0.76	1.92	2.66	89.1	8.2	355	0.73	0.4	565	0
0	66	1	0	0	1	1	171.5	85.5	29.0695	2	121	97	24	6.46	4.6	0.78	1.19	2.99	59.7	4.2	488	0.93	0.25	590	0
1	66	1	1	0	1	0	153.5	83	35.2258	2	195.5	105.5	90	5.95	5.45	2.56	1.36	3.2	59.5	7.6	429	1.06	0.89	975	1
1	66	1	0	0	1	0	157.5	67.4	27.1706	1	139	71	68	6.68	4.34	1.28	0.97	3.01	63.7	7.3	368	0.87	0.71	790	0
1	66	1	1	0	1	0	#NULL!	#NULL!	#NULL!	#NULL!	#NULL!	#NULL!	#NULL!	5.42	5.27	1.9	1.43	3.32	57.1	5.7	346	0.73	0.66	695	0
1	66	1	1	0	1	0	154	57.3	24.1609	1	128.5	82	46.5	5.35	4.89	1.14	1.6	2.79	85.6	6.3	243	0.53	0.62	575	0
1	66	1	1	0	1	1	159	107.5	42.5221	2	143	74	69	5.32	4.82	1.57	1.31	2.98	72.2	5.9	336	0.8	0.1	450	0
0	66	1	1	1	1	0	170.5	87.5	30.0995	2	174	91.5	82.5	9.21	5.72	4.17	0.53	3.24	65.1	4.1	221	0.71	0.89	800	0
0	66	1	1	1	1	1	168.5	81.7	28.7755	2	179	95.5	83.5	6.58	4.83	1.31	1.51	2.73	139.4	11.5	409	0.88	0.8	840	0
0	66	1	1	1	1	1	162	70.5	26.8633	1	180.5	84	96.5	4.35	5.53	0.72	1.98	2.04	86	4.9	218	0.73	0.71	720	0
0	66	1	1	1	1	1	162.5	71	26.8876	1	#NULL!	#NULL!	#NULL!	4.99	5.9	1.01	2.15	3.37	101.3	5	355	0.97	0.62	795	0
0	66	1	1	1	1	1	164	71.3	26.5095	1	156.5	77.5	79	10.5	5.7	3.17	1.29	3.23	79.7	4.3	267	0.71	0.62	665	0
0	66	1	1	1	1	1	170	78.6	27.1972	1	158	96.5	61.5	8.01	4.54	2.34	1	2.25	76.9	4.5	320	0.724	0.564	644	0
1	66	1	1	1	1	0	159.5	70.7	27.7906	1	150	80	70	8.08	5.36	7.6	0.7	1.62	55.1	3.7	227	0.614	0.985	799.5	0
1	66	1	1	1	1	0	160	74	28.9062	2	129	77	52	10.48	5.75	1.29	1.1	4.1	77.8	9.3	262	0.741	0.637	689	0
0	66	1	1	0	0	0	162	60.4	23.0148	0	192	93	99	5.06	4.66	1.2	1.66	2.51	73.4	7.1	296	0.62	0.97	795	0
0	66	1	1	0	0	0	162.5	65	24.6154	1	146.5	70	76.5	5.19	3.7	0.7	1.49	1.83	90.7	4.8	363	0.875	0.823	849	0
0	66	1	1	0	0	0	165.5	69.9	25.52	1	143	96.5	46.5	5.87	4.96	0.77	1.22	3.38	81.4	5.8	315	0.739	0.756	747.5	0
0	66	1	1	0	0	0	153.5	57.5	24.4034	1	141	87.5	53.5	5.89	4.45	0.96	1.65	2.53	84.3	8.1	351	0.594	0.707	650.5	0
0	66	1	0	0	0	0	172.5	54.1	18.1811	0	118.5	72.5	46	4.79	4.73	0.69	1.97	2.56	92.7	7.1	408	0.44	0.64	540	0
0	66	1	1	0	0	0	159	69.1	27.3328	1	#NULL!	#NULL!	#NULL!	4.92	4.81	0.66	1.77	2.8	68.7	7.9	225	0.593	0.632	612.5	0
0	66	1	1	0	0	1	161.5	50	19.1701	0	155	103.5	51.5	5.4	4.23	0.56	2.07	2.04	84.2	6.2	351	0.41	0.47	440	0
0	66	1	1	0	0	0	169.5	82.6	28.7502	2	151	90.5	60.5	6.5	6.37	2.09	1	4.52	92.4	7	264	0.778	0.464	621	0
1	66	1	1	0	0	0	159.5	81.9	32.1931	2	164.5	96	68.5	5.59	5.85	1.51	1.48	3.78	60.2	4.8	278	0.71	1.15	930	1
1	66	1	0	0	0	0	156	67.1	27.5723	1	137	82.5	54.5	5.01	5.5	1.91	0.97	3.7	57.3	4.8	290	0.938	1.032	985	1
1	66	1	1	0	0	0	151	46.3	20.3061	0	152.5	83	69.5	4.83	5.74	1.76	1.2	3.7	68.7	5.4	363	0.738	1.029	883.5	1
1	66	1	1	0	0	1	167.5	71	25.3063	1	148	83	65	5.73	6.5	2.57	1.15	4.41	82.2	4.5	300	0.812	1.008	910	1
1	66	1	1	0	0	0	144.5	59.2	28.3522	2	158.5	90	68.5	6.17	6.19	0.82	1.48	2.56	44.1	4.6	303	1.173	0.914	1043.5	1
1	66	1	1	0	0	0	150.5	67.6	29.8451	2	142.5	83	59.5	5.29	5.89	3.2	0.76	4.03	72.1	6	354	1.15	0.8	975	1
1	66	1	0	0	0	0	154	43.3	18.2577	0	97.5	58	39.5	5.69	3.96	0.54	1.82	1.68	74.3	5.1	311	1.006	0.724	865	1
1	66	1	1	0	0	0	143	56.2	27.483	1	146.5	76	70.5	5.1	4.25	1.02	1.62	2.22	60.5	6.9	239	0.71	0.99	850	0
1	66	1	1	0	0	0	152	60	25.9695	1	173	87	86	5.34	4.95	1.13	1.21	3.51	58.9	4.5	237	0.97	0.97	970	0
1	66	1	0	0	0	0	148	46.4	21.1833	0	132	77.5	54.5	5.12	5.91	1.43	1.91	3.49	60.4	5.7	198	0.803	0.904	853.5	0
1	66	1	1	0	0	0	146.5	73.8	34.386	2	139	87	52	5.58	3.78	1.06	1.01	2.37	61.8	5.5	302	0.95	0.892	921	0
1	66	1	1	0	0	0	152	48.9	21.1652	0	163	87.5	75.5	5.28	4.97	0.94	1.96	2.75	56.7	5.2	223	0.62	0.89	755	0
1	66	1	1	0	0	0	153.5	73.2	31.0666	2	153.5	71.5	82	5.62	4.35	1.8	1.26	2.28	62	6.3	261	0.945	0.887	916	0
1	66	1	0	0	0	0	154	68.7	28.9678	2	138	76.5	61.5	4.95	6.05	3.14	1.35	3.47	61	4.1	215	0.62	0.88	750	0
1	66	1	0	0	0	0	153	48	20.5049	0	#NULL!	#NULL!	#NULL!	5.81	4.5	0.73	2.11	2.26	64.4	5.4	196	0.676	0.875	775.5	0
1	66	1	1	0	0	0	144.5	43.2	20.6894	0	157	83	74	6.07	5.09	1.49	0.9	3.53	63.6	4.5	352	0.73	0.87	800	0
1	66	1	1	0	0	0	149	54.2	24.4133	1	160	94	66	5.92	8.02	2.2	1.49	6.28	81.4	7.3	272	0.607	0.834	720.5	0
1	66	1	1	0	0	0	152.5	57.3	24.6385	1	170	86	84	5.55	6.65	2.79	1.11	3.94	53.7	4.6	268	0.645	0.828	736.5	0
1	66	1	1	0	0	0	151	61.9	27.1479	1	148	84.5	63.5	5.86	4.68	2.11	0.91	2.98	52.8	4	286	0.798	0.814	806	0
1	66	1	1	0	0	0	154	67.9	28.6305	2	155.5	75.5	80	5.44	4.66	3.32	0.83	2.48	63.3	5.4	339	0.92	0.8	860	0
1	66	1	1	0	0	0	148.5	61.9	28.0697	2	162	84	78	5	4.12	1.11	0.89	2.59	68.7	5	273	0.8	0.8	800	0
1	66	1	1	0	0	0	155	52.9	22.0187	0	149.5	88.5	61	5.12	5.27	2.15	1.45	2.74	70.2	5.6	205	0.75	0.8	775	0
1	66	1	0	0	0	0	159	61.6	24.3661	1	138.5	80	58.5	5.44	6.87	2.18	1.16	4.56	63.9	6.3	257	0.71	0.8	755	0
1	66	1	1	0	0	0	163	65.8	24.7657	1	164	94.5	69.5	5.45	4.04	1.26	1.41	2.02	64	5.6	281	0.71	0.79	750	0
1	66	1	1	0	0	0	148.5	61.7	27.979	1	142.5	70	72.5	5.34	4.84	1.2	2	2.35	50.9	3.6	204	0.841	0.782	811.5	0
1	66	1	1	0	0	0	150	60.5	26.8889	1	147	78	69	5.88	5.79	1.21	1.54	3.89	56.3	3.4	282	0.697	0.771	734	0
1	66	1	1	0	0	0	162.5	58.5	22.1538	0	171	94	77	5.18	4.84	1.38	1.08	3.25	54.5	3.9	295	0.778	0.762	770	0
1	66	1	1	0	0	0	154.5	53.3	22.329	0	153	76.5	76.5	5.06	4.92	1.08	1.78	2.82	55.7	5.5	247	0.852	0.753	802.5	0
1	66	1	1	0	0	0	157.5	60.6	24.4293	1	143	75	68	4.9	4.27	0.75	1.54	2.5	62.8	5.8	199	0.64	0.75	695	0
1	66	1	1	0	0	0	157	78.1	31.6849	2	144	90	54	4.64	4.45	1.47	1.22	2.69	64.4	4.5	251	0.64	0.75	695	0
1	66	1	0	0	0	0	161	64.2	24.7676	1	117	67	50	5.39	4.46	1.27	1.27	2.67	64	6.4	282	0.59	0.75	670	0
1	66	1	1	0	0	0	152.5	51.5	22.1446	0	146	80.5	65.5	5.34	5.95	0.86	1.92	3.9	55.2	8.7	225	0.56	0.75	655	0
1	66	1	0	0	0	0	151.5	51.3	22.3507	0	125	60.5	64.5	6.2	5.38	0.72	1.52	3.62	68.2	7	195	0.792	0.749	770.5	0
1	66	1	1	0	0	0	153	59.5	25.4176	1	147.5	94.5	53	4.76	4.93	0.65	1.41	3.15	55	5.7	257	0.572	0.749	660.5	0
1	66	1	0	0	0	0	153.5	55.7	23.6395	0	112.5	67.5	45	4.99	5.14	1.45	1.46	3.1	57.8	5.1	158	0.519	0.748	633.5	0
1	66	1	0	0	0	0	149.5	52.2	23.3554	0	125	72	53	5.03	4.45	0.51	1.08	3.09	79.6	6.6	351	0.749	0.745	747	0
1	66	1	1	0	0	0	151.5	56.2	24.4856	1	192.5	87	105.5	5.99	5.8	1.14	1.36	4.09	52.5	4.3	191	0.586	0.714	650	0
1	66	1	1	0	0	0	158	58	23.2335	0	158	84.5	73.5	4.91	4.18	1.54	1.11	2.43	62.8	4.5	245	0.79	0.712	751	0
1	66	1	1	0	0	0	148.5	43.8	19.8619	0	175.5	94.5	81	5.31	6.23	0.68	1.57	4.38	76.9	5.6	365	0.97	0.71	840	0
1	66	1	1	0	0	0	155.5	63.5	26.2611	1	152	76	76	6.26	5.49	0.87	1.24	3.88	60.7	6.4	215	0.89	0.71	800	0
1	66	1	1	0	0	0	151.5	66	28.7554	2	137	86	51	5.99	5.8	2.29	1.2	3.89	60.8	5.2	248	0.79	0.71	750	0
1	66	1	1	0	0	0	158.5	65.5	26.0725	1	142	70	72	5.82	4.22	0.84	0.99	2.82	60.6	7.2	266	0.66	0.71	685	0
1	66	1	0	0	0	0	153	52.6	22.47	0	115.5	86.5	29	6.02	6.25	1.54	1.25	4.42	76.8	6	271	0.62	0.71	665	0
1	66	1	1	0	0	0	156	57.8	23.7508	0	180	91.5	88.5	6.39	4.39	0.78	1.43	2.52	61	7	316	0.62	0.71	665	0
1	66	1	1	0	0	0	165.5	60	21.9056	0	147.5	82.5	65	5.95	6.75	0.87	1.37	5.11	43.4	6.8	167	0.576	0.698	637	0
1	66	1	1	0	0	0	153	63.5	27.1263	1	157.5	91	66.5	5.2	5.89	1.42	1.1	4.28	62.1	5.6	348	0.579	0.656	617.5	0
1	66	1	1	0	0	0	156	87.3	35.8728	2	152	89.5	62.5	5.49	4.17	1.23	1.18	2.52	69.5	6.9	393	0.533	0.644	588.5	0
1	66	1	1	0	0	0	147.5	56.2	25.8317	1	131	85	46	5.11	5.9	2.04	1.2	3.98	64.5	4.6	368	0.505	0.644	574.5	0
1	66	1	1	0	0	0	151	60.4	26.4901	1	145	82	63	5.57	4.08	0.84	1.71	2.21	55.4	4.9	235	0	0.64	320	0
1	66	1	1	0	0	0	158	88.7	35.5312	2	147	66.5	80.5	5.76	6.16	2.36	1.16	4.21	67.8	7.6	287	0.88	0.62	750	0
1	66	1	1	0	0	0	145	46.7	22.2117	0	147.5	82.5	65	5.46	4.03	1.35	1.15	2.12	53.6	6.1	268	0.62	0.62	620	0
1	66	1	1	0	0	0	156	67.3	27.6545	1	141	74.5	66.5	5.52	5.44	1.38	1.46	3.51	48	4.6	207	0.62	0.62	620	0
1	66	1	1	0	0	0	146.5	45.4	21.1534	0	151.5	60	91.5	5.13	5.9	1.36	1.54	3.74	51.5	4.5	185	0.44	0.62	530	0
1	66	1	0	0	0	0	133	42.2	23.8566	0	128	82	46	5.59	5.07	1.05	1.38	3.25	55.5	2.8	209	0.36	0.62	490	0
1	66	1	1	0	0	0	162	65.6	24.9962	1	144	83	61	4.98	5.62	1.24	1.78	3.36	70.2	6.2	242	0.58	0.592	586	0
1	66	1	1	0	0	0	151.5	57.7	25.1391	1	125	70	55	5.03	3.77	1.36	1.12	1.92	63.4	4.6	230	0.675	0.591	633	0
1	66	1	1	0	0	0	158.5	59.7	23.7638	0	127	78.5	48.5	6.97	4.93	1.58	1.42	2.7	57.3	3.8	187	0.92	0.56	740	0
1	66	1	0	0	0	0	158.5	63.8	25.3958	1	119.5	70	49.5	4.91	5.25	0.98	1.45	3.39	76.5	6	368	0.71	0.56	635	0
1	66	1	1	0	0	0	146.5	57.2	26.6514	1	154	78.5	75.5	5.16	4.55	1.72	1.23	2.44	79.7	5.1	203	0.587	0.559	573	0
1	66	1	1	0	0	0	151.5	59	25.7055	1	149.5	76	73.5	6.18	2.88	1.51	0.92	1.21	101.7	8	369	0.793	0.551	672	0
1	66	1	1	0	0	0	151.5	53.3	23.2221	0	162.5	85.5	77	4.91	4.94	1.22	1.07	3.28	47.6	2.9	119	0.79	0.54	665	0
1	66	1	1	0	0	0	149.5	81.8	36.5991	2	181	90.5	90.5	5.29	5.17	0.89	1.52	3.34	65.3	4.6	309	0.586	0.464	525	0
0	66	1	1	1	0	1	173.5	86.8	28.8351	2	156	101	55	7.42	5.32	0.67	1.45	3.57	73.9	6.1	266	0.71	0.71	710	0
1	66	1	1	1	0	0	146.5	69.4	32.3358	2	163	82.5	80.5	6.33	4.11	0.66	1.47	2.36	59.9	4.6	286	1.06	0.79	925	1
1	66	1	1	1	0	0	#NULL!	#NULL!	#NULL!	#NULL!	#NULL!	#NULL!	#NULL!	8.88	7.43	3.98	1.16	4.89	74	3.7	227	1.32	0.53	925	1
1	66	1	1	1	0	0	161	84.6	32.6376	2	190	91.5	98.5	7.91	5.01	2.51	1.07	3.01	66	5.2	314	0.71	0.89	800	0
1	66	1	1	1	0	0	153	63.4	27.0836	1	129	73.5	55.5	8.2	6.08	1.33	1.57	3.95	56.6	7.5	297	0.84	0.81	825	0
1	66	1	1	1	0	0	#NULL!	#NULL!	#NULL!	#NULL!	165	91	74	5.73	4.45	2.09	0.86	2.54	65	4.3	324	0.71	0.8	755	0
1	66	1	1	1	0	0	154	85	35.8408	2	148.5	79.5	69	8.26	5.34	5.01	0.95	2.53	55.5	4.9	340	0.62	0.79	705	0
1	66	1	1	1	0	0	152.5	64.6	27.7775	1	175	87	88	19.24	5.04	3.88	0.69	2.66	57.7	4.6	279	0.923	0.736	829.5	0
1	66	1	1	1	0	0	151.5	66.6	29.0168	2	#NULL!	#NULL!	#NULL!	7.62	6.6	3.24	1.59	3.89	52.6	3.7	318	0.86	0.73	795	0
1	66	1	1	1	0	1	147.5	70.6	32.4504	2	136	79	57	8.57	4.5	2.06	1.05	3.15	58.1	3.4	265	0.53	0.71	620	0
1	66	1	1	1	0	0	153.5	77	32.6794	2	142.5	90	52.5	6.23	7.12	1.62	1.35	5.18	84.4	6.8	355	0.53	0.71	620	0
1	66	1	0	1	0	0	156	69.5	28.5585	2	138	82	56	8.62	5.67	1.98	1.1	3.85	61.7	6.3	334	0.97	0.62	795	0
1	66	1	1	1	0	0	155	81.7	34.0062	2	157.5	95.5	62	7.38	7.03	4.95	1.05	4.05	73.9	4.7	404	0.81	0.62	715	0
1	66	1	1	1	0	0	154	64.7	27.2812	1	168	82.5	85.5	8.04	4.04	0.93	1.05	2.78	40	2.4	116	0.71	0.62	665	0
1	66	1	1	1	0	0	159	58.6	23.1795	0	168.5	97	71.5	8.54	4.09	0.84	1.61	3.72	51.8	3.2	232	0.44	0.53	485	0
1	66	1	1	1	0	0	151.5	59.8	26.0541	1	174	91	83	7.03	5	1.48	1.44	3.01	57.3	6.4	345	0.548	0.475	511.5	0
0	65	1	1	0	1	0	159	68.7	27.1746	1	182.5	92	90.5	6.33	6.23	1.57	1	4.47	70	3.4	282	1.15	1.33	1240	1
0	65	1	1	0	1	1	164.5	70.9	26.2008	1	194	87.5	106.5	6.39	5.37	1.09	1.6	3.26	90.4	7	391	0.989	1.092	1040.5	1
0	65	1	1	0	1	1	174	78.8	26.0272	1	146	83.5	62.5	4.96	5.41	1.58	1.33	3.54	88.5	5	291	0.913	1.024	968.5	1
0	65	1	1	0	1	1	169.5	86.6	30.1424	2	164	95	69	5.29	5.46	1.82	0.97	3.79	83.7	4.5	491	0.915	1.013	964	1
0	65	1	0	0	1	1	171.5	69.1	23.4936	0	133	78	55	4.78	4.99	0.81	1.75	3.05	71.9	4	315	1.06	0.86	960	1
0	65	1	1	0	1	1	160.5	59.8	23.2141	0	151	82.5	68.5	5.18	5.1	0.53	1.45	3.27	103	7.2	407	1.15	0.71	930	1
0	65	1	1	0	1	1	166	77.1	27.9794	1	156	85.5	70.5	6.01	4.6	1.7	1.14	2.81	90.3	5.4	335	0.818	0.985	901.5	0
0	65	1	0	0	1	1	163.5	63.9	23.9037	0	136	82	54	4.92	6.45	3.85	1.08	3.88	83	4.3	245	0.8	0.97	885	0
0	65	1	1	0	1	1	163	73.2	27.5509	1	181.5	108.5	73	6.26	9.81	2.48	1.94	7.38	70.9	3.6	435	0.71	0.97	840	0
0	65	1	0	0	1	0	172.5	82.5	27.7253	1	#NULL!	#NULL!	#NULL!	4.96	4.56	1.01	1.05	3.01	86.3	6.2	281	0.722	0.955	838.5	0
0	65	1	1	0	1	1	167.5	76	27.0884	1	137	83	54	4.87	4.72	2.1	1.32	2.68	86.9	6.4	335	0.89	0.9	895	0
0	65	1	0	0	1	1	170	57	19.7232	0	133	81.5	51.5	5.64	4.15	0.67	1.84	1.85	52.5	3.2	226	0.71	0.9	805	0
0	65	1	1	0	1	1	171	73.2	25.0333	1	149	92	57	5.76	4.77	1.44	1.23	3.11	66.5	4.9	286	0.56	0.89	725	0
0	65	1	1	0	1	1	166	47.9	17.3828	0	167.5	95.5	72	5	3.93	1.5	1.1	2.09	99.2	4.1	370	0.79	0.88	835	0
0	65	1	1	0	1	1	167	72.7	26.0676	1	178	84	94	5.22	4.68	0.77	2.12	2.44	72.4	6.3	242	0.62	0.88	750	0
0	65	1	1	0	1	1	165	68.9	25.3076	1	147.5	79.5	68	5.28	5.81	1.42	1.4	3.92	93	5.1	297	0.841	0.878	859.5	0
0	65	1	0	0	1	1	165.5	64	23.366	0	127.5	75.5	52	5.91	5.08	2.58	1.09	3.05	75.9	4.8	417	0.856	0.863	859.5	0
0	65	1	1	0	1	0	165.5	66.6	24.3152	1	166	96	70	5.77	5.58	1.02	1.35	3.66	70.9	8.9	261	0.9	0.86	880	0
0	65	1	1	0	1	1	171	72.9	24.9307	1	145	89	56	5.7	4.56	1	0.96	3.02	75.8	4.5	364	0.86	0.86	860	0
0	65	1	1	0	1	0	162.5	63.1	23.8959	0	#NULL!	#NULL!	#NULL!	5.53	5.01	0.74	1.65	3.16	65.5	4.3	259	0.66	0.86	760	0
0	65	1	1	0	1	1	165.5	65	23.7311	0	148.5	73	75.5	4.8	5.19	1.44	1.26	3.15	80	6.4	459	0.89	0.81	850	0
0	65	1	1	0	1	1	160	68.1	26.6016	1	179	95	84	5.8	5.53	0.93	1.64	3.58	70	6.2	157	0.53	0.81	670	0
0	65	1	1	0	1	1	162	63.5	24.196	1	127	79.5	47.5	5.78	5.62	1.2	1.39	3.81	83.4	5.1	263	0.8	0.8	800	0
0	65	1	1	0	1	1	164	65.4	24.3159	1	148	80.5	67.5	5.04	4.71	0.75	1.53	2.98	61.1	6.8	149	0.62	0.8	710	0
0	65	1	1	0	1	1	167.5	74.6	26.5894	1	148.5	106	42.5	6.12	5.84	0.97	0.9	4.35	64.1	4.2	334	0.8	0.79	795	0
0	65	1	1	0	1	1	169.5	75.1	26.1397	1	169.5	85.5	84	5.6	4.3	2.4	0.92	2.59	70.4	4.5	217	0.71	0.79	750	0
0	65	1	1	0	1	0	170	82.1	28.4083	2	153.5	99	54.5	5.64	7.59	4.72	1.03	4.72	98.5	6.6	549	0.71	0.79	750	0
0	65	1	1	0	1	1	164.5	52.5	19.4012	0	177	106	71	4.79	5.6	1.14	1.65	3.54	76.3	3.1	333	0.822	0.788	805	0
0	65	1	1	0	1	1	177	89.2	28.472	2	145	108	37	5.39	5.47	0.92	1.34	3.76	75	6	419	0.672	0.737	704.5	0
0	65	1	1	0	1	1	167.5	79.3	28.2646	2	153	109	44	6.05	5.54	1.45	1.46	3.48	94.6	5.8	374	0.86	0.73	795	0
0	65	1	1	0	1	1	165.5	59.5	21.7231	0	162	91.5	70.5	4.55	3.77	0.61	1.71	1.82	78.9	5.3	283	0.71	0.73	720	0
0	65	1	1	0	1	1	173.5	65.7	21.8256	0	164	83.5	80.5	5.22	4.41	1.02	1.3	2.68	74.4	7.2	272	0.67	0.73	700	0
0	65	1	1	0	1	1	171.5	74.1	25.1936	1	168.5	97	71.5	5.86	3.58	1.15	1.41	1.65	79.8	6.8	386	0.995	0.724	859.5	0
0	65	1	1	0	1	1	172	79.2	26.7712	1	159	95.5	63.5	6.5	3.58	1.25	1.37	1.72	81.1	4.4	443	0.67	0.721	695.5	0
0	65	1	1	0	1	0	170.5	63.1	21.706	0	157	77.5	79.5	4.96	4.75	1.06	1.37	3.52	78.4	5.6	246	0.89	0.71	800	0
0	65	1	1	0	1	1	172.5	89	29.9097	2	154.5	84	70.5	5.42	4.98	1.56	1.16	3.25	73.1	4.6	433	0.798	0.702	750	0
0	65	1	1	0	1	0	172	84.5	28.5627	2	169.5	98	71.5	5.43	5.45	1.75	1.06	3.77	106.9	6.1	431	0.814	0.689	751.5	0
0	65	1	1	0	1	1	167.5	69.8	24.8786	1	149	85.5	63.5	5.5	4.79	0.93	2.26	2.27	99.4	6.7	487	0.67	0.659	664.5	0
0	65	1	1	0	1	0	163.5	58.1	21.734	0	#NULL!	#NULL!	#NULL!	5.79	4.64	1.55	0.76	3.19	72.4	4.8	317	0.501	0.651	576	0
0	65	1	1	0	1	1	164	61	22.68	0	153	89.5	63.5	5.19	4.37	0.5	2.06	2.37	72.1	7.9	349	0.549	0.641	595	0
0	65	1	0	0	1	1	159.5	63	24.7639	1	104	68.5	35.5	5.67	4.04	0.51	1.13	2.68	72.7	4.9	242	0.633	0.64	636.5	0
0	65	1	0	0	1	1	171	66.5	22.742	0	117	83.5	33.5	5.33	4.98	1.72	1.37	2.98	82.1	5.3	346	0.942	0.622	782	0
0	65	1	1	0	1	1	168	78.6	27.8486	1	#NULL!	#NULL!	#NULL!	6.52	5.51	2.68	1.22	3.23	84.9	4.2	408	0.73	0.62	675	0
0	65	1	1	0	1	1	162	74	28.1969	2	171.5	100	71.5	5.28	5.2	1	0.93	3.82	74.3	6.4	286	0.71	0.62	665	0
0	65	1	1	0	1	0	171	81.2	27.7692	1	149.5	84.5	65	5.41	4.43	1.27	1.02	2.73	78.5	6.2	376	0.54	0.62	580	0
0	65	1	1	0	1	1	163.5	68.9	25.7741	1	173	102.5	70.5	5.44	5.87	1.74	2.15	3.28	92	6.6	457	0.819	0.616	717.5	0
0	65	1	1	0	1	1	160	66.4	25.9375	1	184	79.5	104.5	5.69	5.28	1.13	1.51	3.26	84.2	5.2	214	0.55	0.61	580	0
0	65	1	0	0	1	1	183	76.5	22.8433	0	125	76.5	48.5	5.49	3.72	0.86	1.44	1.89	102.4	5.6	303	0.62	0.59	605	0
0	65	1	0	0	1	1	#NULL!	#NULL!	#NULL!	#NULL!	#NULL!	#NULL!	#NULL!	5.12	3.79	1.09	2.01	1.32	59.7	4.8	120	0.53	0.59	560	0
0	65	1	0	0	1	1	173.5	78.2	25.9781	1	130	82	48	5.76	4.24	2.13	0.86	2.57	70.3	4.4	210	0.49	0.58	535	0
0	65	1	1	0	1	1	171	81.1	27.735	1	142	85	57	6.12	4.38	2.72	1	2.45	85.8	6.5	520	0.67	0.57	620	0
0	65	1	1	0	1	1	175.5	70.8	22.9868	0	171	97.5	73.5	6.59	4.81	1.72	1.56	2.75	94.9	4.4	382	0.588	0.564	576	0
0	65	1	0	0	1	1	159	58.4	23.1004	0	139	83	56	6.86	6.08	0.46	2.18	3.75	59.9	5.4	238	0.62	0.56	590	0
0	65	1	0	0	1	0	168	63.3	22.4277	0	109	70.5	38.5	4.56	5.59	0.82	1.55	3.75	80.4	6.5	311	0.62	0.54	580	0
0	65	1	1	0	1	1	163	78.1	29.3952	2	152.5	90.5	62	6.29	5.92	11.98	0.64	2.3	90.4	5.7	377	0.53	0.54	535	0
0	65	1	1	0	1	1	183.5	80.9	24.0257	1	171	95	76	5.54	6.84	3.22	1.89	3.97	60.5	3.4	363	0.44	0.54	490	0
0	65	1	0	0	1	1	176.5	74.6	23.9469	0	134.5	83.5	51	5.15	4.37	0.98	1.34	2.74	62.9	4.4	187	0.34	0.54	440	0
0	65	1	1	0	1	0	162.5	57.8	21.8888	0	163.5	104	59.5	5.44	5.47	0.76	1.81	3.4	72.7	5.4	377	0.9	0.53	715	0
0	65	1	1	0	1	1	165	53.8	19.7612	0	174	99	75	5.41	4.45	1.43	1.21	2.56	64.4	3.3	205	0.8	0.53	665	0
0	65	1	1	0	1	1	166.5	65.3	23.5551	0	146	87.5	58.5	5.49	3.63	1.13	1.18	1.84	83.9	8.1	273	0.71	0.53	620	0
0	65	1	0	0	1	1	163.5	61.5	23.0059	0	136	77	59	5.34	4.73	0.63	1.32	3.21	63.8	6	254	0.59	0.53	560	0
0	65	1	0	0	1	1	166	71.9	26.0923	1	129	77	52	4.37	4.85	1.43	1.35	2.92	85.1	3.8	317	0.57	0.52	545	0
0	65	1	1	0	1	1	176	69.9	22.5659	0	145	97	48	4.37	5.44	0.57	1.99	3.23	71.3	5	303	0.49	0.48	485	0
0	65	1	1	0	1	1	169	67.9	23.7737	0	139.5	83.5	56	6.69	4	0.9	1.47	1.92	69.4	5.5	335	0.521	0.477	499	0
0	65	1	1	0	1	1	156.5	61	24.9058	1	151	89	62	5.3	4.8	1.38	1.64	2.56	73.1	5	392	0.62	0.45	535	0
0	65	1	1	0	1	1	167	57.6	20.6533	0	139	72	67	4.79	6.52	1.01	1.03	5.07	73.9	6.6	288	0.97	0.44	705	0
0	65	1	1	0	1	1	163.5	69	25.8115	1	154	82	72	5.41	4.76	6.83	0.71	0.89	74.6	7.7	366	0.36	0.44	400	0
1	65	1	0	0	1	1	158.5	61.6	24.5201	1	134	70	64	5.46	4.54	1.03	1.4	2.85	54.7	4.5	177	0.993	0.921	957	0
1	65	1	0	0	1	0	159.5	65.2	25.6287	1	126.5	75	51.5	5.19	6.4	1.83	1.52	4.24	85.5	7.5	273	0.81	0.707	758.5	0
1	65	1	0	0	1	1	159	65.3	25.8297	1	131	85	46	5.52	4.41	1.19	1.39	2.53	55.1	5.3	321	0.692	0.697	694.5	0
1	65	1	0	0	1	0	151.5	64.5	28.1018	2	128	81	47	4.71	4.5	1.49	1.12	2.59	65.2	4.4	234	0.563	0.641	602	0
1	65	1	0	0	1	0	161	57.5	22.1828	0	117	69.5	47.5	4.96	5.05	2.29	1.07	3.22	47.4	3.7	269	0.54	0.64	590	0
1	65	1	1	0	1	1	150	58.6	26.0444	1	153	89	64	6.35	3.75	2.03	0.99	3.39	60.5	3.8	219	0.734	0.621	677.5	0
1	65	1	1	0	1	0	154.5	67.6	28.3198	2	158.5	83	75.5	5.47	4.61	1.41	1.54	2.55	52.6	4.1	273	0.71	0.62	665	0
0	65	1	1	1	1	1	162	68.6	26.1393	1	161	79	82	9.4	4.08	0.56	1.4	2.51	63.5	6.1	215	1.013	0.983	998	1
0	65	1	1	1	1	1	172	96.1	32.4838	2	173	85.5	87.5	9.73	6.98	3.91	1.24	3.86	147.7	8.3	548	1.37	0.48	925	1
0	65	1	1	1	1	1	173	73.6	24.5915	1	154.5	87.5	67	12.08	5.02	1.53	0.8	3.46	87	10.2	206	0.8	0.89	845	0
0	65	1	1	1	1	1	168	77.2	27.3526	1	148	85.5	62.5	7.61	3.55	2.24	0.87	1.68	74.2	4.6	250	0.767	0.839	803	0
0	65	1	1	1	1	1	169	70.4	24.649	1	143	93	50	7.83	5.16	4.47	0.94	2.26	85.9	5.6	411	0.793	0.835	814	0
0	65	1	1	1	1	1	168	67	23.7387	0	141.5	73.5	68	8.86	3.24	0.77	1.41	1.4	103.9	5.7	366	0.73	0.81	770	0
0	65	1	1	1	1	1	160	65.1	25.4297	1	149	85.5	63.5	7.08	4.57	1.08	1.64	2.44	67.9	4.7	285	0.54	0.8	670	0
0	65	1	1	1	1	1	166.5	70.6	25.4669	1	163	83	80	9.19	4.14	0.91	1.39	2.31	74	4.7	207	0.9	0.79	845	0
0	65	1	1	1	1	1	160.5	76.8	29.8134	2	125.5	78.5	47	8.02	4.95	6.19	0.78	1.81	76.9	6.6	338	0.861	0.768	814.5	0
0	65	1	0	1	1	0	166.5	78.4	28.2805	2	129.5	85	44.5	7.26	4.73	1.02	1.04	3.22	87.9	6.2	303	0.75	0.73	740	0
0	65	1	1	1	1	1	168.5	71.4	25.1477	1	176	93	83	7.06	5.42	1.13	1.27	3.71	90.1	6	264	0.8	0.71	755	0
0	65	1	1	1	1	1	168.5	81.4	28.6698	2	171	91.5	79.5	7.86	5.94	3.14	0.79	3.87	81.8	6.1	236	0.761	0.649	705	0
0	65	1	1	1	1	1	165.5	62.6	22.8548	0	142.5	84	58.5	4.76	4.93	0.51	1.54	3.16	75.2	6.5	301	0.71	0.62	665	0
0	65	1	1	1	1	1	169	89.5	31.3364	2	163.5	84.5	79	5.48	5.95	1.24	1.71	3.74	77.9	6	284	0.757	0.611	684	0
1	65	1	1	1	1	1	154.5	59.1	24.7589	1	173	83	90	4.7	4.75	0.73	1.19	3.19	53.5	6.1	241	1.06	0.79	925	1
1	65	1	1	1	1	0	157	61	24.7475	1	132	70	62	6.39	5.33	1.13	1.74	3.33	78	7.1	286	0.8	0.88	840	0
0	65	1	1	0	0	0	166.5	75.3	27.1623	1	174.5	89.5	85	5.1	5.7	1.23	1.22	4.11	109.5	6.3	498	0.71	0.97	840	0
0	65	1	0	0	0	0	166	63.8	23.1529	0	133	64	69	6.34	5.49	1.01	1.49	3.46	72.4	4.4	366	0.8	0.8	800	0
0	65	1	1	0	0	1	169.5	76.3	26.5574	1	190.5	120.5	70	4.95	4.15	0.76	1.48	2.34	73.9	5.8	310	0.79	0.8	795	0
0	65	1	1	0	0	1	162	79.2	30.1783	2	198	93.5	104.5	5.87	5.25	1.6	0.73	3.88	78.4	4.7	346	0.729	0.797	763	0
0	65	1	1	0	0	1	157	61.3	24.8692	1	153	76	77	6.27	3.62	0.54	1.89	1.6	70.7	5.8	236	0.62	0.79	705	0
0	65	1	1	0	0	0	166	90.7	32.9148	2	189	96	93	6.11	3.62	0.6	1.11	2.05	79.5	5.6	325	0.53	0.78	655	0
0	65	1	1	0	0	0	163	70.3	26.4594	1	222	122	100	6.55	4.74	0.72	1.81	2.58	84.9	6.3	306	0.71	0.71	710	0
0	65	1	1	0	0	1	171.5	58.5	19.8897	0	144.5	80.5	64	6.07	4.11	1.36	1.24	2.25	75.8	5.6	225	0.69	0.676	683	0
0	65	1	1	0	0	1	153	67.9	29.0059	2	167	94	73	5.05	4.84	3.19	1.06	2.56	65.1	3.8	305	0.863	0.669	766	0
0	65	1	1	0	0	1	171.5	96.6	32.8435	2	174.5	102.5	72	5.33	6.48	1.98	1.32	4.36	87.2	4.7	425	0.62	0.64	630	0
0	65	1	0	0	0	1	166.5	58.4	21.0661	0	129.5	75.5	54	5.56	4.18	0.44	1.96	1.97	68.1	3.5	224	0.548	0.575	561.5	0
0	65	1	1	0	0	1	157	53.9	21.867	0	191	98.5	92.5	4.59	4.14	0.6	1.39	2.33	69.8	4.8	234	0.62	0.53	575	0
0	65	1	1	0	0	0	162	77.4	29.4925	2	175.5	106.5	69	6.32	6.32	1.16	1.38	4.56	77.9	8.6	258	0.62	0.44	530	0
1	65	1	1	0	0	0	162	61.8	23.5482	0	179	89	90	6.73	5.81	1.42	1.07	4.17	66.1	4.5	189	1.13	1.06	1095	1
1	65	1	1	0	0	0	157.5	60.3	24.3084	1	186.5	101.5	85	5.53	5.33	1.36	1.48	3.36	56.4	3.1	258	1.06	1.06	1060	1
1	65	1	1	0	0	0	159.5	62.1	24.4101	1	162	90.5	71.5	5.16	6.46	0.75	1.93	4.38	54.2	4.1	193	0.816	1.013	914.5	1
1	65	1	1	0	0	0	147	46.6	21.5651	0	150.5	67.5	83	5.29	5.27	0.8	1.61	3.37	46	4.2	181	1.049	0.857	953	1
1	65	1	1	0	0	0	149	50.9	22.9269	0	153	67	86	5.26	5.67	0.77	1.71	3.84	66.4	5.4	258	1.37	0.62	995	1
1	65	1	1	0	0	0	156.5	79.8	32.5817	2	164	91	73	5.93	5.39	2.9	0.97	3.39	54.4	5.2	290	0.748	0.943	845.5	0
1	65	1	1	0	0	0	158	52.1	20.8701	0	148	82	66	5.16	4.44	0.73	1.76	2.27	63.2	5.3	258	0.66	0.93	795	0
1	65	1	1	0	0	0	158.5	53.4	21.2561	0	173.5	89.5	84	5.87	4.3	0.77	1.5	2.41	48.7	5.6	196	0.89	0.9	895	0
1	65	1	1	0	0	0	149.5	51.4	22.9975	0	150.5	70	80.5	4.6	4.86	1.5	1.77	2.66	55.5	4	260	0.64	0.9	770	0
1	65	1	1	0	0	0	156	63.8	26.2163	1	161	87	74	6.91	4.18	1.09	1.66	2	66	5	210	0.62	0.89	755	0
1	65	1	1	0	0	1	164.5	78.4	28.9724	2	155.5	90	65.5	5.46	5.59	0.76	2.05	3.47	57.9	3.4	255	0.8	0.88	840	0
1	65	1	1	0	0	0	156	59.4	24.4083	1	174.5	95.5	79	5.57	5.12	1.74	1.32	3.15	57.8	4.3	259	0.629	0.865	747	0
1	65	1	0	0	0	0	152	72.7	31.4664	2	133.5	86	47.5	5.66	5.63	1.8	0.99	3.72	59.2	5.5	337	0.79	0.841	815.5	0
1	65	1	1	0	0	0	144.5	56.3	26.9633	1	157	83.5	73.5	4.67	5.51	1	1.9	3.36	64.4	4	196	0.71	0.81	760	0
1	65	1	1	0	0	0	147.5	39.5	18.1557	0	164	72	92	5.51	5.17	0.59	2.22	2.81	56.1	4.8	225	0.8	0.8	800	0
1	65	1	1	0	0	0	161	66.5	25.6549	1	162.5	89.5	73	5.78	5.75	3.16	1.22	2.94	68.4	8.9	296	0.79	0.8	795	0
1	65	1	1	0	0	0	157	66.9	27.1411	1	155	91	64	4.99	4.52	1.11	1.56	2.49	57.4	5.3	181	0.79	0.8	795	0
1	65	1	1	0	0	0	149.5	56.7	25.3688	1	141.5	86.5	55	4.58	4.59	1.21	1.41	2.54	59.9	5.3	292	0.89	0.79	840	0
1	65	1	1	0	0	0	167	69	24.7409	1	144.5	80	64.5	4.93	6.06	1.46	1.23	4.22	61.3	4.2	247	0.88	0.79	835	0
1	65	1	1	0	0	0	153	48.3	20.6331	0	141	71	70	5.5	5.31	0.98	1.68	3.31	66	4	301	0.6	0.782	691	0
1	65	1	1	0	0	0	157.5	70.4	28.3799	2	141	86	55	5.1	4.7	0.82	1.29	2.84	78.8	6.6	287	0.8	0.78	790	0
1	65	1	1	0	0	0	153.5	55.3	23.4697	0	197.5	115.5	82	6.54	5.46	0.94	1.45	3.74	65.3	4.7	222	0.812	0.75	781	0
1	65	1	1	0	0	0	160.5	82.6	32.0649	2	157	90	67	5.39	4.9	2.04	1.06	3.19	56	5.9	317	0.741	0.743	742	0
1	65	1	1	0	0	0	151	59.8	26.2269	1	155	79	76	5.13	4.7	3.1	0.86	2.42	62.9	4	345	0.71	0.73	720	0
1	65	1	1	0	0	0	163.5	69.8	26.1108	1	167	88	79	5.55	4.53	1.69	1.72	2.1	64.2	6.6	320	0.588	0.724	656	0
1	65	1	1	0	0	0	155.5	73.1	30.2313	2	#NULL!	#NULL!	#NULL!	5.17	6.04	2.61	1.26	2.41	50.9	3.8	313	0.779	0.717	748	0
1	65	1	1	0	0	0	154.5	61.2	25.6386	1	188.5	96	92.5	4.74	6.52	2.49	2.05	3.63	60.2	5.5	202	0.71	0.71	710	0
1	65	1	1	0	0	0	157	77.9	31.6037	2	153	88.5	64.5	5.31	6.08	1.14	1.81	3.53	63.6	4.5	352	0.71	0.71	710	0
1	65	1	1	0	0	0	152.5	51	21.9296	0	159	90	69	5.73	4.27	1.1	1.26	2.32	70.5	3.8	282	0.62	0.71	665	0
1	65	1	1	0	0	0	160.5	59	22.9035	0	154	83	71	6.95	4.33	1.23	1.42	2.5	69.2	4.2	170	0.62	0.71	665	0
1	65	1	1	0	0	0	148.5	56.4	25.5756	1	142	85	57	6.36	5.99	1.91	1.44	4.2	63.4	4.1	368	0.62	0.71	665	0
1	65	1	1	0	0	1	152.5	71.4	30.7014	2	140	74	66	6.02	6.99	2.02	1.39	3.32	86.2	5.4	402	0.62	0.71	665	0
1	65	1	1	0	0	0	157	63	25.5588	1	156	90	66	5.43	4.15	4.23	0.92	1.31	68.1	5.3	277	0.53	0.71	620	0
1	65	1	1	0	0	0	156	63.5	26.093	1	137.5	75.5	62	6.22	4.69	1.19	1.55	2.73	58.6	4.4	480	0.53	0.71	620	0
1	65	1	0	0	0	0	158	66.2	26.5182	1	132.5	70.5	62	5.71	4.41	0.95	1.45	2.55	62.4	5	223	0.53	0.71	620	0
1	65	1	1	0	0	0	158	50.8	20.3493	0	152	89	63	5.95	4.76	1.47	1.67	2.52	52.3	4.4	236	0.67	0.706	688	0
1	65	1	1	0	0	0	161.5	73.5	28.1801	2	150	88.5	61.5	5.9	4.93	1.04	1.65	2.88	63.7	6.3	227	0.725	0.692	708.5	0
1	65	1	1	0	0	0	158	62.4	24.996	1	178.5	95	83.5	5.6	5.76	1.09	1.59	3.82	75.2	5.6	350	0.774	0.681	727.5	0
1	65	1	0	0	0	0	166	62.4	22.6448	0	#NULL!	#NULL!	#NULL!	4.88	4.89	1.1	1.86	2.61	56.8	5.3	221	0.735	0.679	707	0
1	65	1	0	0	0	0	154.5	63.5	26.6022	1	117	75	42	5.07	5.77	0.68	1.82	3.61	50.6	5.3	389	0.638	0.676	657	0
1	65	1	1	0	0	0	158	66.5	26.6384	1	142	78	64	5.23	4.18	1.05	0.89	2.77	53.2	4.3	276	0.748	0.673	710.5	0
1	65	1	1	0	0	0	154	63	26.5643	1	165.5	73.5	92	5.64	6.54	1.37	1.49	1.94	57	3.6	168	0.672	0.668	670	0
1	65	1	1	0	0	0	149.5	55.1	24.653	1	163.5	84	79.5	5.7	4.11	1.53	1.14	2.45	66	4.8	190	0.727	0.667	697	0
1	65	1	1	0	0	0	155.5	65.3	27.0055	1	152.5	85.5	67	4.63	4.71	0.87	1.57	2.77	56.4	5.2	303	0.647	0.662	654.5	0
1	65	1	1	0	0	0	146.5	44.5	20.7341	0	140	73.5	66.5	4.82	5.87	1.02	1.77	3.8	50.5	4.7	218	0.66	0.66	660	0
1	65	1	1	0	0	0	151	39.6	17.3677	0	158	81.5	76.5	5.36	5.75	0.91	1.38	2.38	55.5	6.2	188	0.768	0.654	711	0
1	65	1	1	0	0	0	152.5	63.8	27.4335	1	127.5	83.5	44	5.87	5.03	1.85	1.54	2.88	61.1	5.8	211	0.613	0.634	623.5	0
1	65	1	1	0	0	0	156.5	63.2	25.8041	1	138	86.5	51.5	5.46	5.01	1.48	1.08	3.17	68.4	5.4	233	0.71	0.62	665	0
1	65	1	0	0	0	0	151.5	78.8	34.3321	2	136.5	85	51.5	5.21	5.69	3.66	1.05	3.24	66.4	4.6	429	0.64	0.62	630	0
1	65	1	1	0	0	0	150	58.4	25.9556	1	129	87	42	5.77	5.08	1.42	1.08	3.57	70.4	4.3	204	0.694	0.619	656.5	0
1	65	1	1	0	0	0	165.5	48.1	17.561	0	157	87.5	69.5	5.08	5.01	1.63	1.22	2.93	52.9	5.1	182	0.718	0.607	662.5	0
1	65	1	1	0	0	0	152	61.1	26.4456	1	145	77	68	5.41	6.63	1.57	1.32	5.08	51.3	6.3	220	0.701	0.593	647	0
1	65	1	0	0	0	0	154	71.1	29.9798	2	108	75	33	5.97	6.5	1.3	1.88	4.44	62	5.9	68	0.585	0.59	587.5	0
1	65	1	0	0	0	0	151	59.6	26.1392	1	134.5	73.5	61	5.35	5.8	0.83	1.65	3.98	57.3	6.3	191	0.614	0.588	601	0
1	65	1	1	0	0	0	157	64.1	26.0051	1	145	88.5	56.5	5.43	5.42	0.94	1.35	3.66	73.3	3.5	279	0.588	0.58	584	0
1	65	1	1	0	0	0	166	87.1	31.6084	2	137	93	44	5.52	6.25	1.02	1.41	4.33	53.1	6	259	0.97	0.54	755	0
1	65	1	1	0	0	0	147.5	55.7	25.6018	1	160.5	99.5	61	5.09	6.4	2.34	1.14	4.4	52.9	4.4	269	0.54	0.54	540	0
1	65	1	1	0	0	0	146.5	47.3	22.0387	0	167.5	93	74.5	5.1	6.07	1.77	1.48	4.17	51	3.1	228	0.62	0.53	575	0
1	65	1	0	0	0	0	161.5	79.2	30.3655	2	138	84	54	5.01	5.56	2.86	1.19	3.16	60.5	2.5	240	0.62	0.53	575	0
1	65	1	1	0	0	0	158.5	85.5	34.0336	2	130.5	80	50.5	5	5.2	1.88	1.25	3.12	60.7	3.5	310	0.62	0.53	575	0
1	65	1	0	0	0	0	154	56.4	23.7814	0	135.5	81.5	54	5.03	6.65	0.72	2.03	4.54	58.9	7.9	274	0.57	0.53	550	0
1	65	1	1	0	0	0	156	69.9	28.7229	2	143	76.5	66.5	6.74	4.28	2.04	1.09	2.13	71.7	5.5	219	0.53	0.53	530	0
1	65	1	1	0	0	0	159	90.4	35.7581	2	172	95.5	76.5	5.96	4.79	2.6	1.12	2.12	95.5	7.4	503	0.53	0.53	530	0
1	65	1	1	0	0	0	145.5	64.1	30.2783	2	155.5	82	73.5	5.53	5.68	3.01	1.07	3.6	58.7	4.4	276	0.789	0.514	651.5	0
1	65	1	0	0	0	0	159	61.9	24.4848	1	133	76	57	6	6.02	1.33	1.42	4.11	57.5	5.4	236	0.56	0.45	505	0
1	65	1	1	0	0	0	154	53.5	22.5586	0	144	78	66	5.19	4.42	0.7	1.46	2.65	57.5	4.4	176	0.54	0.45	495	0
1	65	1	0	0	0	0	151	72	31.5776	2	126	69.5	56.5	5.1	4.05	4.08	0.8	1.62	55.5	3.2	365	0.44	0.45	445	0
0	65	1	1	1	0	0	161.5	63.8	24.4611	1	150	92	58	9.48	5.05	0.68	1.41	3.47	87.1	6	322	0.62	0.73	675	0
1	65	1	1	1	0	0	155.5	64.5	26.6747	1	142	80	62	8.4	4.83	1.61	1.14	3.12	52.5	5.1	423	1.41	0.62	1015	1
1	65	1	1	1	0	0	164.2	73.2	27.1497	1	148	79.5	68.5	5.47	4.92	3.3	0.95	2.48	51.3	4.4	248	0.71	0.97	840	0
1	65	1	0	1	0	0	152	63.5	27.4844	1	123.5	76.5	47	5.66	5.07	1.1	1.32	3.34	58.9	5.6	254	0.603	0.965	784	0
1	65	1	1	1	0	0	149.5	90.1	40.3127	2	146	79	67	12.82	6.79	1.59	1.57	4.66	75.2	5.6	273	0.8	0.88	840	0
1	65	1	0	1	0	0	157.5	63.9	25.7596	1	112	70	42	5.54	6.24	1.89	1.02	2.45	47.4	3.2	246	0.71	0.79	750	0
1	65	1	1	1	0	0	161.5	76	29.1386	2	158	85.5	72.5	7.8	4.09	0.97	1	2.59	52.5	6.8	238	0.783	0.783	783	0
1	65	1	1	1	0	0	159	60.4	23.8915	0	142	87	55	10.16	5.86	1.15	1.49	4.21	49.9	4.5	190	0.62	0.71	665	0
1	65	1	0	1	0	0	144	51.5	24.836	1	123	72	51	10.6	6.04	1.09	1.56	4.09	62.8	6.3	307	0.625	0.658	641.5	0
1	65	1	1	1	0	0	150.5	61.6	27.1962	1	176	91	85	10.31	5.22	1.28	1.08	3.56	54.1	4	188	0.648	0.643	645.5	0
1	65	1	1	1	0	0	146.5	57.8	26.931	1	155.5	82	73.5	6.75	3.4	3.33	0.88	0.93	65.7	5.3	469	0.615	0.577	596	0
0	64	1	1	0	1	1	161	64.4	24.8447	1	157	93.5	63.5	5.07	5.28	0.62	1.85	3.28	90.1	8	296	0.88	1.41	1145	1
0	64	1	1	0	1	1	173	88.4	29.5366	2	162	92	70	6.15	5.09	1.62	0.93	3.54	75.5	3.4	360	0.93	1.23	1080	1
0	64	1	1	0	1	0	164	64.4	23.9441	0	150	89	61	6.22	4.4	1.89	0.78	2.73	92.4	4.8	372	0.89	1.06	975	1
0	64	1	1	0	1	0	168.5	62.2	21.9074	0	148.5	71.5	77	5.46	3.92	0.68	1.36	2.17	82	7.3	206	1.15	0.89	1020	1
0	64	1	1	0	1	1	160	79.6	31.0937	2	153	105	48	5.41	5.61	1.08	1.3	3.9	71.3	5.7	372	1.08	0.88	980	1
0	64	1	1	0	1	1	166.5	60.3	21.7515	0	143.5	78	65.5	5.43	4.82	1.68	0.87	3.35	69.5	4.1	282	1.062	0.874	968	1
0	64	1	1	0	1	1	162	72.3	27.5492	1	199	120	79	6.2	5.14	0.79	2	2.92	71.9	6.3	336	1.01	0.86	935	1
0	64	1	1	0	1	1	164	62	23.0518	0	151	89	62	5.57	6.76	2.04	1.25	4.4	77.9	5.1	351	1.173	0.854	1013.5	1
0	64	1	1	0	1	1	166.5	74.4	26.8376	1	162	85	77	5.18	5.77	1.31	1.2	4.06	81.7	3.5	277	1.023	0.854	938.5	1
0	64	1	1	0	1	0	165	81.5	29.9357	2	174	90.5	83.5	5.08	4.49	2.5	0.8	2.69	85	4.8	298	1.15	0.71	930	1
0	64	1	1	0	1	0	167	79.6	28.5417	2	172.5	86	86.5	5.68	5.3	1.57	1.48	3.27	87.1	3.9	348	1.01	0.71	860	1
0	64	1	1	0	1	0	171.5	79.4	26.9956	1	168.5	102	66.5	5.93	4.95	2.6	0.84	2.89	82.1	4.2	349	1.073	0.695	884	1
0	64	1	0	0	1	1	153.5	50	21.2204	0	131	77	54	4.91	6.7	1.31	1.24	5.02	73.3	5.6	305	0.62	0.97	795	0
0	64	1	1	0	1	1	173	86.7	28.9686	2	142.5	88.5	54	4.3	6.12	2.23	1.07	4.08	73.6	6.1	310	0.8	0.9	850	0
0	64	1	1	0	1	1	169.5	73.7	25.6524	1	145	83	62	4.59	4.55	1.08	1.75	2.34	78.4	6.2	287	0.8	0.89	845	0
0	64	1	1	0	1	1	162.5	79.7	30.1822	2	142	93	49	4.61	5.84	2.85	1.05	3.56	73.3	4.5	278	0.8	0.89	845	0
0	64	1	1	0	1	1	179.5	102.1	31.6881	2	137	78	59	4.79	4.41	1.8	0.88	2.85	69.7	4.3	302	0.66	0.89	775	0
0	64	1	1	0	1	1	163.5	74.8	27.9812	1	133	87	46	5.59	4.94	1.17	1.03	3.45	97.7	6.5	436	0.726	0.862	794	0
0	64	1	1	0	1	0	156.5	63.1	25.7633	1	166	101	65	4.82	4.23	0.96	1.57	2.25	61.6	4.6	197	0.821	0.852	836.5	0
0	64	1	1	0	1	1	160	75.5	29.4922	2	147.5	92	55.5	6.59	5.98	1.83	1.34	3.78	89.4	5.3	349	0.955	0.805	880	0
0	64	1	0	0	1	1	158	50.4	20.1891	0	137	89	48	5.23	4.38	1.72	1.34	2.48	80.8	7	254	0.8	0.8	800	0
0	64	1	1	0	1	1	169.5	78.4	27.2883	1	202	114	88	5.95	5.33	1.7	1.31	3.46	84	4.2	427	0.92	0.79	855	0
0	64	1	1	0	1	1	173.5	83.6	27.772	1	163.5	93.5	70	6.27	3.91	2.13	0.69	2.27	82.6	3.6	412	0.88	0.79	835	0
0	64	1	0	0	1	1	170	77.5	26.8166	1	137	86	51	5.26	4.03	0.6	1.16	2.51	72.2	7	280	0.55	0.79	670	0
0	64	1	1	0	1	1	167.5	64.6	23.0252	0	170	84	86	6.92	4.37	0.83	1.69	2.32	65.7	4.3	173	0.767	0.781	774	0
0	64	1	1	0	1	1	170.5	80.5	27.6915	1	160	96	64	5.09	4.27	0.66	1.16	2.88	57.4	4.5	200	0.631	0.761	696	0
0	64	1	1	0	1	0	155.5	57.2	23.6557	0	158	74.5	83.5	5.24	4.13	2.08	0.99	2.33	82.7	4.5	330	0.683	0.758	720.5	0
0	64	1	1	0	1	1	165.5	75.9	27.7106	1	194	113	81	5.3	4.4	1.79	0.8	2.84	98.3	6.5	318	0.56	0.75	655	0
0	64	1	0	0	1	0	167	67.7	24.2748	1	128	72	56	4.71	5.21	0.93	1.22	3.58	80.3	6.5	332	0.874	0.748	811	0
0	64	1	1	0	1	1	173	64.6	21.5844	0	163.5	98.5	65	5.87	5.26	0.66	1.53	3.41	91.3	8.2	221	0.769	0.735	752	0
0	64	1	1	0	1	0	166	53.2	19.3061	0	145	81.5	63.5	4.78	4.44	0.87	1.16	2.87	73.9	4	225	0.53	0.73	630	0
0	64	1	0	0	1	1	178.5	78	24.4804	1	126.5	75	51.5	5.51	3.84	2.11	1.12	1.85	96.6	6.3	322	0.692	0.716	704	0
0	64	1	0	0	1	1	178	77.3	24.3972	1	136	92.5	43.5	5.85	4.92	2.15	0.99	3.07	83.4	6	345	0.704	0.713	708.5	0
0	64	1	1	0	1	1	174.5	75.7	24.8602	1	174.5	92	82.5	6.34	5.06	1.39	1.18	3.43	80.8	4	276	0.9	0.71	805	0
0	64	1	1	0	1	1	171.5	79.2	26.9276	1	163	101	62	4.8	3.93	1.51	0.89	2.42	125.9	8.8	565	0.79	0.71	750	0
0	64	1	1	0	1	1	170	88	30.4498	2	154	88.5	65.5	5.22	5.51	2.6	1.07	3.4	70.4	4.1	373	0.79	0.71	750	0
0	64	1	0	0	1	1	168	64.6	22.8883	0	122	71.5	50.5	4.91	5.13	0.98	1.54	3.09	86.2	5.9	289	0.71	0.71	710	0
0	64	1	1	0	1	1	167.5	65.4	23.3103	0	147	86	61	5.24	3.79	0.97	1.5	2.04	72.2	7.7	182	0.71	0.71	710	0
0	64	1	1	0	1	1	162.5	60.8	23.0249	0	154.5	94	60.5	5.48	6.77	2.33	1.15	4.65	77.1	3.6	426	0.62	0.71	665	0
0	64	1	1	0	1	1	167.5	81.6	29.0844	2	176	95.5	80.5	5.19	4.82	1.09	1.02	3.45	71.4	4.6	232	0.62	0.71	665	0
0	64	1	1	0	1	0	158	72	28.8415	2	145.5	82	63.5	5.23	4	1.09	1.13	2.41	61.8	3.6	298	0.54	0.71	625	0
0	64	1	1	0	1	1	167.5	73.3	26.1261	1	175.5	108.5	67	5.84	5.5	1.74	0.94	2.73	109.4	7.2	285	0.716	0.691	703.5	0
0	64	1	1	0	1	0	173	68.8	22.9877	0	151.5	100	51.5	6.02	4.05	1.18	1.24	2.36	87.2	4.7	285	0.592	0.686	639	0
0	64	1	1	0	1	1	156.5	50.1	20.4555	0	157	91.5	65.5	5.79	4.45	0.55	1.95	2.15	64.4	5.5	305	0.678	0.675	676.5	0
0	64	1	1	0	1	1	169.5	68.5	23.8425	0	139	79.5	59.5	5.14	4.99	0.67	1.81	2.99	85.3	6.9	455	0.8	0.64	720	0
0	64	1	1	0	1	0	159.5	65.8	25.8645	1	120.5	94.5	26	5.3	3.86	1.26	1.23	1.98	86.3	5.2	281	0.62	0.64	630	0
0	64	1	1	0	1	1	164	78.8	29.298	2	159.5	96	63.5	5.61	5.12	0.63	1.75	3.03	87.8	5.7	311	0.53	0.64	585	0
0	64	1	1	0	1	1	161	50	19.2894	0	161	88	73	4.26	5.48	2	2.24	2.43	66.3	4.1	291	0.613	0.637	625	0
0	64	1	1	0	1	1	170	61.5	21.2803	0	179	103	76	6.44	4.64	0.81	1.77	2.52	88.5	5.7	328	0.89	0.62	755	0
0	64	1	1	0	1	0	164.5	59.1	21.8402	0	#NULL!	#NULL!	#NULL!	4.94	4.58	1.23	1.33	2.92	72.1	4.5	276	0.8	0.62	710	0
0	64	1	1	0	1	1	163.5	71.7	26.8215	1	140.5	87.5	53	5.03	4.57	1.29	1.19	3.02	101.8	5	362	0.8	0.62	710	0
0	64	1	0	0	1	1	166.5	81.7	29.4709	2	124	75.5	48.5	4.94	4.15	1.92	0.98	2.26	83.3	4.4	418	0.73	0.62	675	0
0	64	1	0	0	1	0	167	56	20.0796	0	129	88.5	40.5	6.05	4.31	0.59	1.39	2.62	67.9	3.1	215	0.71	0.62	665	0
0	64	1	0	0	1	1	176	78.9	25.4713	1	139	86	53	5.81	3.82	1.31	1.1	2.49	71.1	8.5	254	0.71	0.62	665	0
0	64	1	1	0	1	1	160.5	64.3	24.9609	1	150	78	72	6.34	5.61	2.65	1.13	3.72	79.5	4.5	294	0.62	0.62	620	0
0	64	1	1	0	1	0	164	78.4	29.1493	2	161	81.5	79.5	5.53	4.64	2.6	0.82	2.93	77.4	5.9	248	0.57	0.62	595	0
0	64	1	1	0	1	0	154	48.7	20.5347	0	178.5	101	77.5	4.79	4.83	1.12	1.19	3.22	105.9	6.2	475	0.644	0.608	626	0
0	64	1	1	0	1	1	171	53	18.1252	0	174	89.5	84.5	5.11	3.9	0.73	1.81	1.88	67.9	6.2	226	0.539	0.602	570.5	0
0	64	1	1	0	1	0	164.5	69.2	25.5726	1	162.5	84.5	78	6.48	4.82	1.91	1.35	2.84	67.6	7.1	317	1.002	0.585	793.5	0
0	64	1	1	0	1	1	159	66.3	26.2252	1	165	92	73	5.99	5.48	1.27	1.47	3.55	88.5	7	425	0.53	0.56	545	0
0	64	1	1	0	1	1	168.5	70.2	24.7251	1	147	86.5	60.5	5.78	5.51	0.62	1.79	3.48	72.1	6.7	349	0.54	0.54	540	0
0	64	1	1	0	1	0	169.5	71.7	24.9563	1	155	93	62	5.3	5.71	2.52	1.09	3.78	82.7	6.8	315	0.682	0.533	607.5	0
0	64	1	1	0	1	1	167	76	27.2509	1	141.5	81.5	60	5.18	3.87	1	1.38	1.99	74.6	7.1	354	0.62	0.53	575	0
0	64	1	1	0	1	1	168.5	60.6	21.3439	0	153	81.5	71.5	5.47	3.48	1.58	1.61	1.23	81.3	3.9	329	0.44	0.53	485	0
0	64	1	0	0	1	0	160.5	69.1	26.8243	1	133.5	77	56.5	4.91	5.86	0.94	1.56	3.99	89.1	3.5	273	0.62	0.45	535	0
0	64	1	1	0	1	1	168	64.1	22.7112	0	170	98.5	71.5	6.33	4.52	1.76	1.48	2.34	72.4	4.2	300	0.62	0.44	530	0
1	64	1	1	0	1	1	162	65.9	25.1105	1	149	73	76	5.82	6.06	1.41	1.17	4.37	59.9	5.7	366	0.79	0.908	849	0
1	64	1	1	0	1	1	151	44.8	19.6483	0	135.5	57	78.5	5.02	4.46	1.04	2.06	2.2	56	4.8	280	0.715	0.758	736.5	0
1	64	1	0	0	1	0	148.5	46.1	20.9049	0	137	85	52	5.25	6.29	1.24	1.51	4.02	64	3.4	190	0.71	0.6	655	0
1	64	1	1	0	1	1	148	56.9	25.977	1	143	76.5	66.5	4.56	5.21	0.92	1.87	3.02	63.9	9.3	215	0.8	0.54	670	0
0	64	1	1	1	1	1	169	74.3	26.0145	1	172	92	80	9.48	4.53	1.61	1.35	2.59	72.2	7.2	285	0.71	1.16	935	1
0	64	1	1	1	1	1	169	77.5	27.1349	1	165	82	83	9.06	4.51	2.3	1.29	2.31	76.5	5.6	319	0.764	1	882	0
0	64	1	1	1	1	1	170	74.8	25.8824	1	162	106	56	8.5	4.38	1.78	1.22	2.65	77.3	9.3	96	0.99	0.81	900	0
0	64	1	1	1	1	1	167.5	79.5	28.3359	2	155	101	54	9.71	5.08	2.54	1.04	3	77.6	4.3	302	0.62	0.71	665	0
0	64	1	1	1	1	1	167.5	86.5	30.8309	2	166	90	76	7.21	4.57	1.01	1.17	3.02	79.8	5.1	336	0.62	0.71	665	0
0	64	1	1	1	1	1	173	95.7	31.9757	2	166	84	82	14.89	4.94	1.94	1	3.05	82.4	6.8	244	0.79	0.664	727	0
0	64	1	1	1	1	0	178	75.9	23.9553	0	152	89	63	9.36	6.73	7.52	0.78	2.14	84.6	5.9	282	0.74	0.63	685	0
1	64	1	1	1	1	0	161	58	22.3757	0	171.5	80	91.5	4.94	4.48	1.17	1.05	3.44	58.4	4.7	360	0.83	0.888	859	0
0	64	1	0	0	0	0	170.5	81.2	27.9323	1	111.5	76.5	35	6.21	4.17	0.94	1.69	2.02	76.3	5.1	406	1.118	1.042	1080	1
0	64	1	1	0	0	0	163.5	54.7	20.4622	0	143	86	57	5.33	4.12	0.95	2.34	1.25	88.6	6.7	315	0.89	0.99	940	0
0	64	1	1	0	0	1	168	68.2	24.1638	1	170	95	75	5.09	7.37	1.06	2.36	5.01	67.3	3.7	209	0.678	0.828	753	0
0	64	1	1	0	0	1	166.5	82.3	29.6873	2	167	97.5	69.5	6.24	4.63	2.24	0.89	2.47	78.2	7.2	439	0.716	0.817	766.5	0
0	64	1	1	0	0	1	147	57.5	26.6093	1	162	95	67	5.83	3.73	0.84	2.14	1.15	69.7	3.8	220	0.8	0.8	800	0
0	64	1	1	0	0	0	155	53.1	22.102	0	143	84	59	4.6	5.68	0.84	2.13	3.43	69.8	5.2	195	0.725	0.799	762	0
0	64	1	0	0	0	0	161	69	26.6193	1	137	90	47	5.46	4.16	1.11	0.87	2.73	82.4	5.8	289	0.639	0.789	714	0
0	64	1	1	0	0	1	162	69.9	26.6347	1	146	89	57	4.85	4.63	1.08	1.15	3.16	68.1	5.9	225	0.71	0.78	745	0
0	64	1	1	0	0	1	172	76.4	25.8248	1	186	96	90	6.72	4.55	2.24	0.74	2.7	90.8	5	369	0.748	0.648	698	0
0	64	1	1	0	0	0	147.5	59.4	27.3025	1	169.5	89	80.5	5.5	4.44	0.99	1.13	2.88	76.3	5.8	234	0.62	0.62	620	0
0	64	1	0	0	0	0	161.5	62.6	24.001	1	112.5	65.5	47	4.94	3.74	1.42	0.95	2.05	81.1	4.6	298	0.489	0.612	550.5	0
0	64	1	0	0	0	0	166	64.2	23.298	0	123	78.5	44.5	5.31	6.74	1.19	1.69	4.83	83	5.3	555	0.627	0.591	609	0
0	64	1	0	0	0	1	171	66.6	22.7762	0	136	80.5	55.5	5.24	5.55	0.97	1.32	3.72	82.1	7	282	0.62	0.53	575	0
0	64	1	1	0	0	0	176	81.7	26.3753	1	211.5	118.5	93	5.65	4.27	0.9	1	2.84	65.3	5.1	274	0.89	0.44	665	0
1	64	1	1	0	0	0	158	64.4	25.7971	1	145	75	70	5.56	6.31	2.72	1.22	4.27	82.4	6.6	444	0.62	1.23	925	1
1	64	1	1	0	0	0	152.5	51.8	22.2736	0	141	78	63	5.7	5.54	0.87	1.5	3.77	48.9	8.4	292	1.13	1.2	1165	1
1	64	1	1	0	0	0	161	63.5	24.4975	1	140.5	68.5	72	4.92	5.45	1.18	1.22	3.78	59.4	9.4	188	0.978	1.128	1053	1
1	64	1	1	0	0	0	157	66	26.7759	1	165	79	86	5.75	6.12	1.91	1.41	4.05	60.5	4.8	292	0.852	1.109	980.5	1
1	64	1	1	0	0	0	149	87.5	39.4126	2	173	88.5	84.5	4.36	6.4	5.57	0.69	3.39	75	6.2	493	0.807	1.075	941	1
1	64	1	0	0	0	0	159.5	49.9	19.6146	0	129	82	47	4.79	5.45	1.7	1.28	3.56	52.2	6.2	312	0.79	1.07	930	1
1	64	1	1	0	0	0	158	63.9	25.5969	1	148	83.5	64.5	5.67	5.5	2.85	1.2	2.67	58.1	5.5	187	1.046	0.835	940.5	1
1	64	1	0	0	0	0	159.5	64.5	25.3535	1	139	86	53	4.97	6.02	1.29	2.15	3.52	54.5	5	188	1.06	0.8	930	1
1	64	1	1	0	0	0	164.5	74.3	27.4572	1	172	90	82	5.15	4.99	1.37	1.58	2.97	65.7	5	311	1.176	0.775	975.5	1
1	64	1	1	0	0	0	157.5	78.5	31.6453	2	151	82.5	68.5	5.3	7.39	1.35	1.16	5.62	51.6	5	210	0.62	1	810	0
1	64	1	1	0	0	0	149.5	70.2	31.409	2	153	82	71	5.28	6.1	1.17	1.4	4.27	74.3	5.2	412	0.71	0.98	845	0
1	64	1	1	0	0	0	155.5	57.4	23.7384	0	149	78	71	5.41	4.88	2.49	1.17	2.88	51.5	3.9	295	0.911	0.945	928	0
1	64	1	1	0	0	0	158	69.9	28.0003	2	151	79	72	6.34	5.58	1.23	1.09	3.92	98.7	4.4	419	0.88	0.93	905	0
1	64	1	1	0	0	0	154	72.1	30.4014	2	179	92	87	5.99	4.47	2.94	0.82	2.39	58.7	4.2	254	0.8	0.88	840	0
1	64	1	0	0	0	0	161	76.6	29.5513	2	132	83.5	48.5	6.21	5.28	1.76	1.18	3.28	75.2	4.4	310	0.78	0.858	819	0
1	64	1	1	0	0	0	151	68.3	29.9548	2	148.5	90.5	58	4.65	5.79	0.82	1.48	4.13	61.3	6.2	380	0.763	0.84	801.5	0
1	64	1	1	0	0	0	151	64.2	28.1567	2	184	97.5	86.5	4.95	5.31	2.65	0.93	3.04	67.1	5.1	298	0.69	0.835	762.5	0
1	64	1	0	0	0	0	156	67	27.5312	1	136.5	69.5	67	5	4.41	1.26	1.62	3.42	55.2	5.5	316	0.749	0.825	787	0
1	64	1	1	0	0	0	153	51.5	22.0001	0	176	92.5	83.5	4.94	5.25	1.48	2.13	2.72	44.2	4.4	191	0.939	0.816	877.5	0
1	64	1	0	0	0	0	151.5	57	24.8342	1	126	72	54	5.08	5.5	4.28	0.99	2.74	59.1	4.6	199	0.79	0.81	800	0
1	64	1	1	0	0	0	152	74.8	32.3753	2	152	83	69	5.15	4.53	0.96	1.26	3.02	60.2	5.3	203	0.702	0.81	756	0
1	64	1	1	0	0	0	154	59.7	25.1729	1	170	89	81	5.8	5.13	1.43	1.31	3.09	56.5	5.9	236	0.95	0.8	875	0
1	64	1	1	0	0	0	150	59.6	26.4889	1	155.5	81	74.5	4.89	5.04	1.23	0.94	3.45	59.9	4.5	271	0.62	0.79	705	0
1	64	1	1	0	0	0	148	54.8	25.0183	1	150	86	64	4.82	4.63	1.63	1.23	2.64	63.1	5.4	236	0.627	0.78	703.5	0
1	64	1	1	0	0	0	150.5	60.3	26.6222	1	183	83	100	4.31	4.22	0.69	1.53	2.33	70.5	6.4	232	0.961	0.752	856.5	0
1	64	1	1	0	0	0	152.5	66.5	28.5945	2	140	70	70	5.57	3.5	1.46	1.05	1.92	52.5	4.1	218	0.737	0.751	744	0
1	64	1	1	0	0	0	152.5	65.1	27.9925	1	150.5	89.5	61	5.76	4.86	3.93	1	2.22	70.5	5.1	411	0.644	0.747	695.5	0
1	64	1	1	0	0	0	154	59.4	25.0464	1	162	86	76	4.17	5.93	1.69	1.45	3.82	71.1	4.3	222	0.778	0.733	755.5	0
1	64	1	0	0	0	0	155.5	58.5	24.1933	1	133	74	59	5.9	5.8	1.12	1.7	3.89	49.2	5.1	384	0.73	0.73	730	0
1	64	1	1	0	0	0	155	62.7	26.0978	1	157.5	83.5	74	6.37	3.98	1.19	1	2.37	57.5	5.1	256	0.71	0.73	720	0
1	64	1	1	0	0	0	153	63	26.9127	1	143	77	66	6.5	6.05	2.41	0.82	4.19	97.2	12.7	427	0.703	0.717	710	0
1	64	1	1	0	0	0	153	46.1	19.6933	0	168	108	60	5.38	7.41	1.19	1.75	5.23	119.1	7	302	0.792	0.713	752.5	0
1	64	1	0	0	0	0	152.5	53.5	23.0046	0	132.5	75.5	57	5.37	5.04	0.78	1.47	3.46	68.1	6.3	260	0.556	0.713	634.5	0
1	64	1	1	0	0	0	154.5	54.2	22.7061	0	153	75	78	4.89	5.48	1.08	1.58	3.64	64.6	5.2	224	0.88	0.71	795	0
1	64	1	1	0	0	0	156	64.6	26.545	1	161.5	91.5	70	5.18	5.81	2.39	1.41	3.75	54.4	2.9	293	0.87	0.71	790	0
1	64	1	1	0	0	0	164	73	27.1416	1	116.5	80.5	36	5.64	4.36	1.9	1.15	2.34	73.1	5.2	322	0.81	0.71	760	0
1	64	1	0	0	0	0	153	58.7	25.0758	1	114.5	70	44.5	4.3	5.73	1	1.2	4.04	65.5	3.8	254	0.8	0.71	755	0
1	64	1	1	0	0	0	150.5	66	29.1388	2	151	80	71	5.02	5.59	1.25	1.3	3.99	59.9	5.1	212	0.8	0.71	755	0
1	64	1	1	0	0	0	150.5	43.5	19.2051	0	171	93	78	6.26	4.22	0.61	1.97	2.86	65.4	4.4	236	0.79	0.71	750	0
1	64	1	1	0	0	0	157.5	64.2	25.8806	1	154.5	92	62.5	5.05	4.39	2.07	1.06	2.39	73.4	5.6	318	0.71	0.71	710	0
1	64	1	0	0	0	0	150.5	68.1	30.0659	2	127	72.5	54.5	5.64	3.36	0.7	0.92	2.01	63.4	7.5	266	0.62	0.71	665	0
1	64	1	1	0	0	0	152	73.4	31.7694	2	154	68	86	6.53	5.04	1.36	1.32	3.42	57.9	5.7	338	0.62	0.71	665	0
1	64	1	1	0	0	0	154.5	54.7	22.9156	0	132	73.5	58.5	5.88	5.03	3.54	1.11	2.41	50.9	3.8	313	0.778	0.7	739	0
1	64	1	1	0	0	0	156	78.8	32.38	2	158	83	75	5.35	4.68	0.91	1.7	2.62	62.6	5.3	197	0.979	0.699	839	0
1	64	1	1	0	0	0	152.5	78.4	33.7114	2	152	75	77	4.85	5.56	0.91	1.95	3.34	63.5	6.5	227	0.69	0.699	694.5	0
1	64	1	1	0	0	0	154.5	57.3	24.0048	1	115.5	66.5	49	5.57	4.67	1.08	1.13	3.09	80.4	8.4	396	0.664	0.675	669.5	0
1	64	1	0	0	0	0	163	74.1	27.8896	1	115	80	35	5.48	5.47	1.68	1.4	3.48	63.4	4.2	394	0.556	0.675	615.5	0
1	64	1	0	0	0	0	154.5	59.9	25.094	1	122.5	73.5	49	5.52	4.21	0.92	1.57	2.28	56.5	4.2	235	0.557	0.674	615.5	0
1	64	1	1	0	0	0	162.5	79	29.9172	2	173	102.5	70.5	3.79	5.88	0.82	1.32	4.47	76.3	5.6	441	0.81	0.67	740	0
1	64	1	1	0	0	1	149.5	66.8	29.8878	2	140	68	72	4.96	4.11	0.83	1.26	2.62	51.6	5	277	0.62	0.67	645	0
1	64	1	1	0	0	0	165	60.6	22.259	0	115.5	68.5	47	6.16	3.93	1.03	1.08	2.54	73.7	5.2	293	0.84	0.64	740	0
1	64	1	1	0	0	0	164	94.2	35.0238	2	150	87	63	5.09	7.24	1.71	2.03	4.88	60.2	5.8	287	0.668	0.637	652.5	0
1	64	1	0	0	0	0	161.5	63.9	24.4994	1	136.5	75.5	61	5.34	6.04	1.99	1.99	3.82	60.4	4.7	163	0.652	0.636	644	0
1	64	1	1	0	0	0	157.5	78.8	31.7662	2	140.5	80	60.5	5.78	5.31	1.77	1.27	3.34	56.4	3.1	233	0.663	0.628	645.5	0
1	64	1	1	0	0	0	154.5	64.7	27.1049	1	147.5	96	51.5	5.78	5.55	1.95	1.25	3.46	51.8	4.5	220	0.698	0.626	662	0
1	64	1	1	0	0	0	150.5	65.6	28.9622	2	126	87	39	5.34	5.25	1.11	1.41	3.46	63.1	6.5	299	0.71	0.62	665	0
1	64	1	1	0	0	0	152.5	52.8	22.7036	0	148.5	75	73.5	5.29	5.23	0.92	1.81	3.18	62.8	4	182	0.62	0.62	620	0
1	64	1	0	0	0	0	159	49.3	19.5008	0	127	71	56	5.84	7.52	1.6	1.74	5.16	53.6	5.4	206	0.54	0.62	580	0
1	64	1	1	0	0	0	163	65	24.4646	1	156	93.5	62.5	6.07	5.41	1.13	1.99	3.82	60.4	4.7	163	0.54	0.62	580	0
1	64	1	1	0	0	0	156.5	65.3	26.6615	1	153	87.5	65.5	6.14	6.32	1.87	1.13	4.46	67.6	6.1	471	0.715	0.617	666	0
1	64	1	1	0	0	0	152.5	56.8	24.4235	1	159	94	65	5.51	5.64	2.47	1.14	3.6	63.4	6.6	196	0.66	0.615	637.5	0
1	64	1	1	0	0	0	160.5	67.2	26.0867	1	165	106.5	58.5	5.75	5.95	6.26	0.83	1.1	62	5.9	226	0.698	0.613	655.5	0
1	64	1	1	0	0	0	160	66.5	25.9766	1	160	88	72	5.85	5.11	0.74	1.46	3.34	52.8	5.4	251	0.592	0.593	592.5	0
1	64	1	0	0	0	0	147	43.4	20.0842	0	113	67	46	5.11	4.64	0.79	1.73	2.48	43.1	2.4	190	0.78	0.59	685	0
1	64	1	1	0	0	0	164	74.7	27.7736	1	182	96	86	6.56	4.9	2.44	1.34	2.99	52.5	4	235	0.62	0.59	605	0
1	64	1	1	0	0	0	146	59.8	28.054	2	163	83	80	5.78	5.16	1.58	1.3	3.18	52.8	5	254	0.59	0.59	590	0
1	64	1	1	0	0	0	151	54.6	23.9463	0	146	77	69	5.16	5.2	1.15	1.21	3.61	58.1	4.5	231	0.56	0.59	575	0
1	64	1	1	0	0	0	164.5	68	25.1291	1	156	82	74	5.31	5.04	1.09	1.49	3.06	67.3	3.9	260	0.486	0.574	530	0
1	64	1	1	0	0	0	142	46.4	23.0113	0	148	91	57	4.98	4.47	0.98	1.76	2.28	53.2	3.5	226	0.775	0.566	670.5	0
1	64	1	0	0	0	0	160	51.7	20.1953	0	131	79	52	5.29	6.85	1.5	1.58	4.66	57.5	5	280	0.653	0.566	609.5	0
1	64	1	0	0	0	0	149.5	55.3	24.7425	1	135	74	61	6.17	6.23	1.73	1.09	4.33	87.2	7.5	396	0.71	0.54	625	0
1	64	1	0	0	0	1	156	60.5	24.8603	1	120.5	75.5	45	5.52	6.27	7.85	0.86	1.54	54.9	7.9	333	0.54	0.54	540	0
1	64	1	1	0	0	1	157.5	55.6	22.4137	0	145	83	62	4.85	6.82	1.13	1.68	4.68	70.2	4.7	265	0.44	0.54	490	0
1	64	1	0	0	0	0	158.5	53.7	21.3755	0	131	82.5	48.5	5.49	4	1.58	1.09	2.18	63.3	6.4	221	0.62	0.53	575	0
1	64	1	1	0	0	0	158	63.4	25.3966	1	139.5	79.5	60	5.22	5.24	1.64	1.71	2.87	70.5	4.1	258	0.44	0.53	485	0
1	64	1	1	0	0	0	158.5	67.1	26.7094	1	151	83	68	6.21	4.82	0.75	1.55	3.02	62.1	4.4	215	0.44	0.53	485	0
1	64	1	1	0	0	0	156.5	70	28.5805	2	165	80	85	5.06	6.86	1.79	1.6	4.64	58.3	4.6	332	0.726	0.511	618.5	0
1	64	1	0	0	0	0	147	46.8	21.6576	0	123	70.5	52.5	5.09	4.92	0.66	1.84	3.03	59.1	5	157	0.58	0.5	540	0
0	64	1	0	1	0	0	170.5	79.9	27.4851	1	139	80	59	7.7	3.12	1.09	1.24	1.47	79.6	5.4	333	0.71	0.9	805	0
1	64	1	1	1	0	0	166	66.3	24.0601	1	145	77	68	15.2	3.17	1.81	0.99	1.49	49	4.8	200	0.81	1.15	980	1
1	64	1	1	1	0	0	144.1	57	27.4503	1	166	110.5	55.5	7.4	3.97	1.33	1.55	1.89	60.2	6.2	228	0.839	1.014	926.5	1
1	64	1	1	1	0	0	155	63.9	26.5973	1	193.5	92	101.5	12.91	6.49	1.32	1.75	4.31	75.9	4.8	267	1.06	0.8	930	1
1	64	1	1	1	0	0	150.5	60.1	26.5339	1	153	78	75	6.65	5.41	0.93	1.67	3.37	54.1	4.7	297	0.79	0.97	880	0
1	64	1	1	1	0	0	146	58.8	27.5849	1	158	85	73	8.95	5.06	1.18	1.19	3.3	53.9	3.3	140	0.638	0.921	779.5	0
1	64	1	1	1	0	0	163.5	85.5	31.9838	2	160	88	72	5.61	7.25	2.99	1.14	4.71	86.9	5.2	441	0.71	0.9	805	0
1	64	1	1	1	0	0	141.5	53.3	26.6204	1	207	76	131	8.29	4.72	1.63	1.27	2.76	51.9	5.1	363	0.881	0.849	865	0
1	64	1	1	1	0	1	160	64.9	25.3516	1	180	95	85	7.43	5.01	1.36	1.31	3.23	53.8	3.9	252	0.8	0.84	820	0
1	64	1	1	1	0	0	159	80.5	31.8421	2	135	68	67	8.9	4.75	1.66	1.06	3.22	72.7	5.7	396	0.64	0.84	740	0
1	64	1	1	1	0	0	145.5	48.3	22.815	0	160	81.5	78.5	7.41	6.26	0.95	1.41	4.47	62.1	7.9	354	0.728	0.784	756	0
1	64	1	1	1	0	0	155.5	49.7	20.554	0	149	91	58	7.28	3.46	1.45	1	1.77	56.3	4.6	181	0.699	0.77	734.5	0
1	64	1	1	1	0	0	156.5	66.1	26.9881	1	148	79	69	13.31	5.53	7.52	0.6	1.86	44.1	4.9	215	0.839	0.759	799	0
1	64	1	1	1	0	0	161	85.8	33.1006	2	136	79.5	56.5	7.48	4.62	1.31	1.41	2.59	64.4	3.2	249	0.629	0.732	680.5	0
1	64	1	1	1	0	0	151	69.3	30.3934	2	148	88	60	9.84	5.71	3.45	1.16	3.26	53.7	5.8	374	0.584	0.731	657.5	0
1	64	1	1	1	0	0	159	68	26.8977	1	131.5	80.5	51	10.6	5.95	2.32	1.26	3.78	64.9	6.2	212	0.62	0.73	675	0
1	64	1	1	1	0	0	147	57.1	26.4242	1	162	77	85	5.77	5.11	2.05	1.39	2.92	57.3	7.2	84	0.737	0.718	727.5	0
1	64	1	1	1	0	0	170.5	86.6	29.7899	2	166	79.5	86.5	5.6	5.1	1.96	0.99	3.07	53.6	5.2	254	0.84	0.71	775	0
1	64	1	1	1	0	0	152	70	30.2978	2	146	75	71	11.9	6.05	3.31	1.16	2.38	55.5	6.2	188	0.8	0.71	755	0
1	64	1	1	1	0	0	160	66.7	26.0547	1	152.5	84	68.5	11.21	6.04	1.45	1.23	4.18	55.7	5.6	350	0.922	0.694	808	0
1	64	1	1	1	0	0	157.5	69.2	27.8962	1	#NULL!	#NULL!	#NULL!	9.15	5.61	3.54	1.12	3.22	63.3	2.9	142	0.601	0.685	643	0
1	64	1	1	1	0	0	159	68	26.8977	1	151	87	64	7.24	6.4	12.3	0.85	1.46	60	5.1	385	0.521	0.67	595.5	0
1	64	1	1	1	0	0	161	72.5	27.9696	1	150.5	72	78.5	7.82	5.42	1.49	1.24	3.56	52.1	4.2	274	0.817	0.627	722	0
1	64	1	0	1	0	0	156	53.2	21.8606	0	112.5	61	51.5	6.89	5.96	3.53	1.08	3.64	121.1	10.9	749	0.8	0.62	710	0
1	64	1	1	1	0	0	156.5	47.1	19.2306	0	156.5	76.5	80	9.56	4.29	0.98	1.36	3.4	64.9	5.9	268	0.79	0.62	705	0
1	64	1	1	1	0	0	154.5	53.9	22.5804	0	170.5	105.5	65	7.17	6.06	1.77	1.25	2.7	69.3	5.2	245	0.79	0.62	705	0
1	64	1	0	1	0	0	161	77.3	29.8214	2	133	71.5	61.5	5.57	3.86	1.7	1.01	2.12	79.4	6.3	419	0.62	0.62	620	0
1	64	1	1	1	0	0	151.5	64.3	28.0147	2	165	98.5	66.5	8.45	5.59	1.24	1.26	3.9	50.9	5.3	197	0.46	0.62	540	0
1	64	1	1	1	0	0	152.5	62.1	26.7025	1	184	125.5	58.5	8.78	5.23	1.02	1.46	2.46	94	5.8	311	0.709	0.583	646	0
1	64	1	1	1	0	0	#NULL!	#NULL!	#NULL!	#NULL!	148	81.5	66.5	11.79	4.85	1.24	1.31	3.07	53.6	5.2	254	0.73	0.53	630	0
1	64	1	1	1	0	0	163.5	83	31.0486	2	167	79.5	87.5	7.49	5.7	2.19	1.39	3.59	66.5	4.8	276	0.53	0.53	530	0
0	63	1	0	0	1	0	160	67.9	26.5234	1	131.5	84	47.5	5.58	5.83	1.5	1.25	3.95	74.9	7.2	492	0.8	1.41	1105	1
0	63	1	1	0	1	1	170	62.1	21.4879	0	144	83	61	5.22	4.97	0.92	1.42	3.05	74.8	4.5	199	0.99	1.07	1030	1
0	63	1	1	0	1	1	158	66.3	26.5582	1	194.5	125.5	69	5.69	5.39	0.73	1.66	3.43	73.3	5.9	271	0.8	1.06	930	1
0	63	1	1	0	1	1	167	73.9	26.4979	1	149.5	89	60.5	5.37	5.22	1.44	1.1	3.72	80	6.8	332	0.54	1.06	800	1
0	63	1	1	0	1	1	176	79	25.5036	1	140	86.5	53.5	4.85	6.06	1.08	1.15	4.54	82.1	4	336	1.07	0.9	985	1
0	63	1	1	0	1	1	174.5	76.5	25.1229	1	193	113	80	4.88	4.71	1.8	0.95	2.95	96.9	4.4	339	1.11	0.89	1000	1
0	63	1	1	0	1	0	161	64.4	24.8447	1	158	79	79	6.23	6.33	0.99	2.01	3.91	68.9	4.9	254	1.25	0.8	1025	1
0	63	1	0	0	1	0	169.5	58.1	20.2226	0	131	86	45	5.55	3.95	0.69	1.21	2.44	91.1	7.7	251	1.009	0.781	895	1
0	63	1	1	0	1	1	171.5	74.9	25.4656	1	150	85	65	5.09	2.7	1.22	0.75	1.47	86.3	5	276	0.74	0.99	865	0
0	63	1	1	0	1	1	170	63.4	21.9377	0	146.5	89.5	57	6.19	5.09	0.62	2.39	2.67	72.6	5	217	0.71	0.97	840	0
0	63	1	1	0	1	1	172.5	76.3	25.6417	1	169.5	95.5	74	5.97	3.95	3.25	0.73	1.78	90.4	3.4	345	0.71	0.97	840	0
0	63	1	1	0	1	0	161	75.1	28.9726	2	174	91	83	5.84	5.56	1.32	0.99	3.9	76.1	6.1	346	0.646	0.911	778.5	0
0	63	1	1	0	1	1	163	61.9	23.2978	0	181	98	83	4.3	4.92	1.68	1.19	3.05	70	4.5	272	0.99	0.9	945	0
0	63	1	1	0	1	1	164.5	106	39.1718	2	142.5	87.5	55	6.53	5.61	2.71	1.04	3.51	80.8	4	330	0.71	0.9	805	0
0	63	1	1	0	1	0	164.5	62.3	23.0227	0	157	77	80	4.69	2.43	0.5	1.45	2.43	59.2	3.2	214	0.782	0.861	821.5	0
0	63	1	0	0	1	1	174.5	83.9	27.5531	1	122	70	52	4.99	3.91	1.68	1.14	2	80.9	4.5	473	0.8	0.86	830	0
0	63	1	1	0	1	1	160	69.6	27.1875	1	118	83	35	5.69	5.42	1.12	1	4.03	68.4	6.2	395	0.62	0.85	735	0
0	63	1	0	0	1	0	162.5	53.8	20.374	0	130.5	70	60.5	5.22	3.54	0.54	1.37	1.91	64	3.1	270	0.885	0.827	856	0
0	63	1	0	0	1	1	161.5	49.6	19.0168	0	123	69	54	5.58	4.68	0.5	1.9	2.68	67.8	7.6	272	0.89	0.81	850	0
0	63	1	1	0	1	1	185.5	87	25.2832	1	157.5	94.5	63	6.94	5.12	1.3	1.53	3.13	89.1	4.7	450	0.71	0.8	755	0
0	63	1	1	0	1	0	178.5	74.8	23.4761	0	156.5	96	60.5	5.32	5.19	1.11	1.41	3.46	78.8	5.9	278	0.53	0.8	665	0
0	63	1	0	0	1	1	166.5	64.5	23.2665	0	138	84	54	5.25	5.6	0.69	2.21	3.27	60.3	6	402	0.8	0.79	795	0
0	63	1	0	0	1	1	169.5	75.9	26.4181	1	116.5	80.5	36	5.26	4.87	1.67	1.19	3.2	93.6	3.3	348	0.79	0.79	790	0
0	63	1	1	0	1	1	159	64.7	25.5923	1	#NULL!	#NULL!	#NULL!	5.6	4.63	1.38	1.02	2.86	68.1	3.9	302	0.62	0.79	705	0
0	63	1	1	0	1	1	173	79.5	26.5629	1	181	118.5	62.5	5.16	5.46	0.9	1.34	3.77	68.4	6.5	296	0.62	0.79	705	0
0	63	1	1	0	1	1	168	74.4	26.3605	1	145	85	60	5.08	4.96	1.94	0.9	3.23	83.5	4.7	326	0.85	0.78	815	0
0	63	1	1	0	1	1	165.5	75.5	27.5646	1	163	99	64	6.08	4.96	1.89	0.89	3.36	67.3	4.8	249	0.555	0.78	667.5	0
0	63	1	1	0	1	1	169.5	64.5	22.4502	0	190.5	104.5	86	5.09	5.04	0.9	2.27	2.45	73.4	5.1	236	0.758	0.776	767	0
0	63	1	1	0	1	1	170	89.6	31.0035	2	149.5	88.5	61	5.55	5.65	2.32	1.29	3.58	88.4	4.3	548	0.8	0.75	775	0
0	63	1	1	0	1	0	154	44	18.5529	0	149.5	84.5	65	5.21	4.58	0.65	1.79	2.58	111	6.4	350	0.73	0.75	740	0
0	63	1	1	0	1	1	159.5	61.7	24.2529	1	144	83.5	60.5	4.86	3.62	0.55	1.65	1.64	72.3	9.8	274	0.84	0.73	785	0
0	63	1	0	0	1	1	176.5	64.9	20.8332	0	136.5	74.5	62	4.76	4.76	0.6	2.06	2.55	80.8	4.5	333	0.81	0.73	770	0
0	63	1	0	0	1	1	#NULL!	#NULL!	#NULL!	#NULL!	#NULL!	#NULL!	#NULL!	5.43	4.84	0.75	1.88	2.71	74.6	8.1	233	0.97	0.71	840	0
0	63	1	1	0	1	1	164.5	87	32.1505	2	142	97.5	44.5	4.67	4.32	0.74	1.73	2.29	76.5	3.7	271	0.89	0.71	800	0
0	63	1	0	0	1	1	171.5	65.3	22.2016	0	134	90.5	43.5	5.26	5.38	0.82	2.15	3.14	70.7	4	282	0.88	0.71	795	0
0	63	1	1	0	1	1	166.5	79.6	28.7134	2	163	89	74	5.55	5.37	2.06	0.86	3.48	73.4	4.5	363	0.88	0.71	795	0
0	63	1	1	0	1	1	167	57.5	20.6174	0	149	80	69	5.58	5	0.77	1.2	3.59	80.5	8.1	339	0.79	0.71	750	0
0	63	1	0	0	1	1	171	80.3	27.4614	1	130.5	86	44.5	5.05	4.62	1.33	0.99	2.99	80	6.1	270	0.79	0.71	750	0
0	63	1	0	0	1	1	170	69.1	23.91	0	121	78	43	5.32	4.03	0.56	1.45	2.28	74.5	4.2	251	0.75	0.71	730	0
0	63	1	1	0	1	1	172.5	85.4	28.6999	2	135.5	94	41.5	5.36	5.23	1.56	1.26	3.33	87	5.9	529	0.73	0.71	720	0
0	63	1	0	0	1	1	169	75.5	26.4346	1	131	90	41	6.07	5.11	1.08	1.74	3.04	85.9	4.5	409	0.71	0.71	710	0
0	63	1	0	0	1	0	168	66.3	23.4906	0	109.5	69	40.5	4.54	4.01	0.73	1.26	2.4	83.1	7.6	294	0.62	0.71	665	0
0	63	1	1	0	1	0	157	61.5	24.9503	1	143.5	95.5	48	5.43	4.59	1.02	1.16	2.85	66.5	7.2	185	0.62	0.71	665	0
0	63	1	1	0	1	0	161.5	62.1	23.8093	0	157	94	63	5.74	4.92	1.19	1.09	3.36	103.3	6.4	438	0.56	0.71	635	0
0	63	1	1	0	1	0	163.5	58.3	21.8089	0	127.5	77.5	50	5.39	4.88	0.87	1.65	2.86	72.1	4.7	222	0.54	0.71	625	0
0	63	1	1	0	1	1	172	81.5	27.5487	1	173.5	106	67.5	4.95	5.22	1.01	1.66	3.27	69.5	7.4	287	0.44	0.71	575	0
0	63	1	1	0	1	1	172	85	28.7317	2	138	86	52	5.2	5.21	2.67	0.77	3.31	90.1	5.9	539	0.736	0.706	721	0
0	63	1	1	0	1	1	167	66.8	23.9521	0	134.5	80.5	54	5.47	4.45	1.88	1.22	2.54	71.2	5.5	352	0.926	0.696	811	0
0	63	1	1	0	1	1	175	77.1	25.1755	1	153	90	63	4.57	4.82	1.98	1.3	2.55	90.1	4.5	309	0.628	0.669	648.5	0
0	63	1	1	0	1	1	167.5	64.2	22.8826	0	164	95	69	6.22	5.11	0.55	2.01	2.94	68.7	5.5	338	0.67	0.66	665	0
0	63	1	1	0	1	0	157	63.6	25.8023	1	143	86	57	5.03	5.61	1.37	1.45	3.9	67.6	4.1	412	0.753	0.634	693.5	0
0	63	1	1	0	1	0	162	62.9	23.9674	0	153	92	61	5.47	3.59	1.03	0.87	2.19	75.5	4.4	288	0.71	0.62	665	0
0	63	1	1	0	1	1	163.5	74	27.6819	1	143.5	90.5	53	5.63	5.12	1.42	1.61	2.94	83.3	5.4	276	0.71	0.62	665	0
0	63	1	1	0	1	1	165.5	70.7	25.8121	1	171.5	94	77.5	5.81	4.84	1.18	1.39	2.93	104	6.3	354	0.62	0.62	620	0
0	63	1	1	0	1	1	166.5	73.1	26.3687	1	180	98.5	81.5	5.49	4.86	0.89	1.28	3.06	84.3	5.4	256	0.62	0.62	620	0
0	63	1	1	0	1	1	160	51	19.9219	0	157.5	106	51.5	4.43	3.31	0.82	1.11	1.69	76	6.2	257	0.56	0.62	590	0
0	63	1	1	0	1	1	161	55	21.2183	0	139.5	84.5	55	4.65	4.47	0.38	1.72	2.53	65	4.4	145	0.54	0.62	580	0
0	63	1	1	0	1	1	166.5	65.4	23.5912	0	116	75.5	40.5	5.69	4.78	1.05	0.97	3.34	79.2	7.7	336	0.53	0.62	575	0
0	63	1	1	0	1	1	173.5	81.6	27.1076	1	148.5	96.5	52	6.95	6	0.8	2.2	3.68	58.9	7.3	289	0.651	0.573	612	0
0	63	1	1	0	1	1	168	62.5	22.1443	0	145.5	80.5	65	5.28	4.82	0.92	1.75	2.75	70.2	9.1	377	0.572	0.565	568.5	0
0	63	1	1	0	1	1	160	60.7	23.7109	0	158	88	70	5.5	5.04	0.76	2.52	2.25	64.7	6.7	256	0.54	0.56	550	0
0	63	1	0	0	1	1	160	60.5	23.6328	0	132	83	49	6.52	2.12	2.12	1.3	2.9	75	4.4	427	0.581	0.557	569	0
0	63	1	1	0	1	1	168.5	73.5	25.8873	1	153	86.5	66.5	5.22	6.27	4.16	1.24	2.6	107.5	6.2	320	0.53	0.55	540	0
0	63	1	1	0	1	1	173	61	20.3816	0	142.5	87	55.5	5.31	4.31	1.29	1.4	2.35	74.6	5.8	258	0.71	0.54	625	0
0	63	1	1	0	1	1	178	81.5	25.7228	1	160	89	71	2.89	3.5	0.47	1.27	2.11	99.4	9.2	337	0.62	0.54	580	0
0	63	1	1	0	1	1	163.5	84	31.4227	2	172.5	103	69.5	6.24	6.05	1.64	1.11	4.21	98.5	5.5	419	0.62	0.54	580	0
0	63	1	1	0	1	1	176.5	67.4	21.6357	0	148	95.5	52.5	4.66	4.33	1.04	1.55	2.34	92.4	6.3	267	0.53	0.54	535	0
0	63	1	0	0	1	0	167.5	80.4	28.6567	2	134	95	39	6.28	3.61	0.8	1.1	2.16	78.2	4.9	283	0.53	0.54	535	0
0	63	1	1	0	1	1	173	70.6	23.5892	0	150	81	69	5.44	4.34	0.83	1.7	2.28	64.7	4.1	309	0.71	0.53	620	0
0	63	1	1	0	1	1	166	60	21.7738	0	157.5	103.5	54	5.66	5.51	1.98	1.38	3.29	64	4.2	186	0.62	0.53	575	0
0	63	1	1	0	1	0	162	72.4	27.5873	1	152	99.5	52.5	5.87	4.53	1.25	1.37	2.61	65.5	4.3	198	0.53	0.53	530	0
0	63	1	0	0	1	1	164	65.1	24.2043	1	120	77	43	5.63	4.94	1.34	0.97	3.3	79.2	6	238	0.47	0.53	500	0
0	63	1	1	0	1	1	174.5	73.1	24.0064	1	141	94	47	4.53	5.26	1.26	1.44	3.52	77.5	7.7	239	0.551	0.462	506.5	0
1	63	1	0	0	1	0	150.5	45.1	19.9115	0	133.5	64.5	69	5.35	7.12	1.02	1.63	4.98	52.3	7.8	259	1.06	0.62	840	1
1	63	1	1	0	1	0	155	68.2	28.3871	2	119.5	63.5	56	5.14	5.98	1.82	1.1	4.04	62	4.9	253	0.71	0.79	750	0
1	63	1	1	0	1	1	167.5	78.8	28.0864	2	172.5	100.5	72	6.52	5.36	0.95	1.49	3.36	58.3	5	406	0.79	0.62	705	0
0	63	1	1	1	1	0	177	77	24.5779	1	130.5	79.5	51	7.54	3.37	1.21	0.94	1.77	78.7	4.6	247	0.954	1.146	1050	1
0	63	1	1	1	1	1	175	72.3	23.6082	0	174	111	63	11.48	5.8	1.94	1.07	4.03	122.9	7.9	548	0.87	1	935	0
0	63	1	1	1	1	1	159.5	81.4	31.9965	2	#NULL!	#NULL!	#NULL!	7.31	4.3	2.3	0.77	2.55	108.9	6.6	278	0.9	0.9	900	0
0	63	1	1	1	1	1	173	92.4	30.8731	2	154	85	69	7.57	5.27	1.58	0.97	3.71	65.7	3.5	394	0.941	0.815	878	0
0	63	1	1	1	1	1	182.5	101.4	30.4447	2	154	87.5	66.5	7.36	4.43	0.87	1.53	2.56	80.4	7.3	331	0.89	0.8	845	0
0	63	1	1	1	1	1	169.5	92.6	32.2308	2	168.5	103	65.5	7.3	4.59	0.61	1.15	3.08	63.1	4.9	259	0.89	0.8	845	0
0	63	1	1	1	1	1	165	63.7	23.3976	0	155.5	92.5	63	7.02	4.38	0.78	1.43	2.58	78.2	5.1	394	0.62	0.77	695	0
0	63	1	1	1	1	1	171	72.3	24.7256	1	139	81.5	57.5	5.33	3.3	2.55	0.91	1.25	81.2	6.1	289	0.71	0.71	710	0
0	63	1	1	1	1	1	171	72.8	24.8965	1	159	88	71	8.17	4.7	1.26	1.69	2.88	75.6	6.9	449	0.62	0.71	665	0
0	63	1	1	1	1	1	158	54.3	21.7513	0	143.5	83.5	60	7.79	5.55	0.66	1.8	3.59	84	8.9	251	0.683	0.651	667	0
0	63	1	0	1	1	0	172.5	74.2	24.9359	1	126	75	51	11.44	6.1	2.65	1.37	4.15	72.7	6.1	311	0.71	0.63	670	0
0	63	1	1	1	1	1	162	54.6	20.8048	0	159	91.5	67.5	7.47	5.55	1.43	1.68	3.3	64	4.3	323	0.53	0.53	530	0
1	63	1	0	1	1	0	159.5	64.9	25.5108	1	126	75	51	13.11	7	1.68	1.48	2.7	65.8	5.6	237	0.62	0.54	580	0
0	63	1	1	0	0	0	168.5	75.4	26.5565	1	215	111.5	103.5	5.71	6.07	1.29	1.13	4.36	66.9	5.6	246	1.16	1.24	1200	1
0	63	1	0	0	0	0	164	67.2	24.9851	1	128	66.5	61.5	4.91	3.95	1	1.52	2.02	74.1	3.6	231	0.97	0.97	970	0
0	63	1	0	0	0	0	168	77.5	27.4589	1	122	71.5	50.5	5.91	5.12	0.73	1.77	3.14	80.8	5.2	383	0.81	0.9	855	0
0	63	1	0	0	0	1	166.5	74.5	26.8737	1	137	79	58	4.83	3.95	1.31	0.93	2.51	85.6	4.8	278	0.64	0.87	755	0
0	63	1	1	0	0	0	176	75	24.2123	1	152	75	77	4.78	3.84	0.96	1.28	2.15	69.1	4.6	296	0.62	0.79	705	0
0	63	1	1	0	0	0	166.5	88.7	31.996	2	153	91	62	5.89	5.34	1.17	1.33	3.57	84.1	6	296	0.8	0.74	770	0
0	63	1	0	0	0	0	161	60.7	23.4173	0	137	71	66	5.35	4.04	0.81	1.16	2.54	78.9	5	360	0.704	0.737	720.5	0
0	63	1	0	0	0	0	166	87.4	31.7172	2	131.5	91	40.5	5.69	4	1.79	0.62	2.4	100.1	5	297	0.81	0.73	770	0
0	63	1	1	0	0	0	163	79.8	30.035	2	163	87.5	75.5	6.8	3.38	2	0.99	1.81	75	6.4	274	0.79	0.71	750	0
0	63	1	1	0	0	0	176.5	78.1	25.0704	1	183	90	93	6.62	5.34	0.6	1.87	3.28	71.1	8	242	0.62	0.71	665	0
0	63	1	1	0	0	1	167.5	72.5	25.8409	1	142.5	84	58.5	5.79	4.59	1.76	0.93	2.82	78.8	7.2	295	0.62	0.71	665	0
0	63	1	0	0	0	1	167.5	72.7	25.9122	1	127	85	42	4.61	5.47	3.6	1.09	3.04	83.6	5.9	235	0.71	0.67	690	0
0	63	1	1	0	0	0	181	77	23.5036	0	149	93	56	6.71	4.44	2.74	0.96	2.27	82.2	4.4	298	0.71	0.62	665	0
0	63	1	1	0	0	0	172	55.6	18.7939	0	154	108.5	45.5	4.95	5.35	0.81	1.42	3.63	72.4	7.1	233	0.53	0.62	575	0
0	63	1	1	0	0	1	166	65.5	23.7698	0	146.5	90.5	56	4.93	4.95	0.99	1.43	3.15	86.3	8.6	274	0.81	0.54	675	0
0	63	1	1	0	0	0	164.5	60.6	22.3945	0	147.5	90	57.5	5.26	5.23	1.94	1.08	3.15	76.5	3.7	287	0.62	0.45	535	0
1	63	1	1	0	0	0	154	69.3	29.2208	2	140	86	54	4.52	4.91	8.54	0.64	1.06	56	4.1	254	0.79	1.07	930	1
1	63	1	1	0	0	0	155.5	67.7	27.9981	1	169.5	87.5	82	5.48	8.25	2.03	1.16	6.63	56.4	4.6	300	1.06	0.99	1025	1
1	63	1	1	0	0	0	150.5	58.9	26.0041	1	142	75	67	5.88	6.5	1.76	1.44	4.39	67.4	4.9	337	0.72	1	860	0
1	63	1	1	0	0	0	154.5	60.8	25.471	1	150	92	58	5.09	5.76	2.08	1.05	3.81	58.4	6.2	237	0.816	0.952	884	0
1	63	1	1	0	0	0	148	61.6	28.1227	2	147	90	57	5.27	4.16	1.38	1.05	2.51	62.4	4.3	256	0.677	0.892	784.5	0
1	63	1	1	0	0	0	152	51.5	22.2905	0	146	83	63	4.38	4.4	4.61	0.87	1.46	59.7	3.9	318	0.71	0.89	800	0
1	63	1	1	0	0	0	159.5	89.7	35.2591	2	185	95	90	6.32	4.97	2.77	1.24	2.89	52.8	3.7	203	0.71	0.88	795	0
1	63	1	1	0	0	0	153	68	29.0487	2	144	86.5	57.5	5.96	3.67	1.2	0.91	2.19	51.6	6.8	347	0.53	0.88	705	0
1	63	1	1	0	0	0	147	51.4	23.7864	0	#NULL!	#NULL!	#NULL!	5.21	6.28	2.1	1.11	4.36	65.8	6.1	305	0.93	0.86	895	0
1	63	1	1	0	0	0	157	67.2	27.2628	1	161	95	66	6.26	4.39	2.68	1.02	2.25	57.9	3.9	197	0.783	0.855	819	0
1	63	1	0	0	0	0	156	46.8	19.2308	0	121	60	61	4.91	5.19	0.86	1.53	3.35	54.4	3.7	156	0.8	0.84	820	0
1	63	1	1	0	0	0	156	69.9	28.7229	2	177	100	77	5.68	5.55	1.06	1.51	3.53	61.8	5	257	0.765	0.836	800.5	0
1	63	1	1	0	0	0	158.5	77.3	30.7695	2	161	80	81	5.18	4.15	1.24	1.19	2.52	59.2	5.8	286	0.81	0.8	805	0
1	63	1	1	0	0	1	157	58.3	23.6521	0	150	82	68	5.79	4.06	0.7	1.6	2.12	60.8	5.1	255	0.62	0.8	710	0
1	63	1	0	0	0	0	163.5	67.5	25.2504	1	138	80	58	5.73	5.3	0.94	1.63	3.2	55.5	4.4	274	0.68	0.781	730.5	0
1	63	1	1	0	0	0	157.5	63.4	25.5581	1	165	89.5	75.5	5.33	5.28	1.23	1.72	3.19	66	5.4	265	0.927	0.767	847	0
1	63	1	1	0	0	0	155	64	26.6389	1	150	81	69	5.81	4.5	1.07	1.3	2.7	48.3	4.1	319	0.691	0.756	723.5	0
1	63	1	1	0	0	0	155	58.2	24.2248	1	144	78	66	5.13	5.66	1.54	1.26	3.91	63.2	5.2	253	0.75	0.75	750	0
1	63	1	1	0	0	0	148	52.9	24.1508	1	155	71	84	4.4	4.53	2.34	0.94	2.33	63.3	4.4	269	0.628	0.75	689	0
1	63	1	1	0	0	0	152.5	54.9	23.6066	0	150	80.5	69.5	5.25	5.35	1.13	1.53	3.42	57.1	4.9	225	0.758	0.738	748	0
1	63	1	1	0	0	0	152.5	50.5	21.7146	0	148.5	78.5	70	5.59	4.5	2.16	1.2	2.06	62.6	4	251	0.804	0.736	770	0
1	63	1	1	0	0	0	153	58.3	24.905	1	142	91	51	4.78	6.02	1.51	1.26	4.06	60.1	6	239	0.62	0.73	675	0
1	63	1	1	0	0	0	160	68.9	26.9141	1	132.5	76.5	56	5.13	5.75	1	1.5	3.9	54.2	5.3	194	0.62	0.73	675	0
1	63	1	1	0	0	0	150.5	46.8	20.662	0	146.5	79.5	67	6.22	5.37	0.82	1.64	3.46	61	5.8	252	0.56	0.73	645	0
1	63	1	1	0	0	0	151.5	58.6	25.5313	1	164.5	89	75.5	6.22	6.43	2.91	0.88	4.47	68.6	3.4	258	0.79	0.71	750	0
1	63	1	1	0	0	0	152	72	31.1634	2	145	84	61	5.16	6.08	1.41	1.5	4.47	63.1	5.4	429	0.71	0.71	710	0
1	63	1	1	0	0	0	157	72.3	29.3318	2	153	87.5	65.5	4.84	5.71	0.9	1.96	3.55	62	5.9	351	0.872	0.708	790	0
1	63	1	1	0	0	0	156.5	52.5	21.4354	0	166	90	76	4.74	6.02	1.14	1.98	3.57	56.6	6.4	225	0.81	0.708	759	0
1	63	1	1	0	0	0	159.5	61.4	24.135	1	136	81.5	54.5	6.24	6.34	1.38	1.64	4.23	66.6	6	294	0.697	0.695	696	0
1	63	1	0	0	0	0	153.5	57.6	24.4459	1	118	76.5	41.5	4.57	5.73	7.62	0.85	1.87	54.4	5.9	354	0.71	0.69	700	0
1	63	1	1	0	0	0	143	54.6	26.7006	1	140	84.5	55.5	6.96	4.81	1.85	0.97	3.13	75.2	6.5	378	0.487	0.684	585.5	0
1	63	1	1	0	0	0	153.5	67	28.4353	2	157	92	65	6.07	5.02	1.67	1.41	3	53.7	6.1	221	0.609	0.679	644	0
1	63	1	1	0	0	0	154	52.7	22.2213	0	140.5	76.5	64	6.07	5.06	0.6	2.07	2.85	82.6	7.3	231	0.599	0.676	637.5	0
1	63	1	1	0	0	0	154.5	68.1	28.5292	2	158.5	83.5	75	4.64	4.5	3.22	1.09	2.3	72.9	4.6	301	0.62	0.67	645	0
1	63	1	0	0	0	0	157.5	58	23.3812	0	111	69	42	4.88	6.48	1.68	1.61	4.19	66.6	4.4	341	0.686	0.668	677	0
1	63	1	1	0	0	0	152.5	65.5	28.1645	2	132.5	83.5	49	4.92	4.58	1.72	1.58	2.31	72.3	6.8	403	0.541	0.654	597.5	0
1	63	1	1	0	0	0	147	62.5	28.9231	2	136	70.5	65.5	6	4.41	1.62	1.17	2.53	57.8	3.3	268	0.64	0.64	640	0
1	63	1	0	0	0	0	155.5	50.8	21.0089	0	132.5	74.5	58	4.86	5.45	0.63	1.55	3.71	52.9	5.7	225	0.66	0.631	645.5	0
1	63	1	0	0	0	0	159	60	23.7332	0	124	77.5	46.5	6.77	6.36	1.52	1.42	4.27	65.7	5.7	257	0.627	0.631	629	0
1	63	1	1	0	0	0	156.5	58.7	23.9668	0	164	67	97	5.5	5.72	2.02	1.19	3.7	57.9	3.4	396	0.655	0.627	641	0
1	63	1	1	0	0	0	148	54.4	24.8356	1	181.5	112.5	69	5.72	5.69	0.95	1.6	3.86	54.8	3	184	0.73	0.62	675	0
1	63	1	1	0	0	0	159	65.2	25.7901	1	154	93	61	5.97	4.53	1.16	1.2	4.66	57.5	5	280	0.71	0.62	665	0
1	63	1	1	0	0	0	159	65.5	25.9088	1	161.5	89	72.5	5.64	5.43	0.89	1.75	3.31	57.8	4.9	221	0.62	0.62	620	0
1	63	1	1	0	0	0	169.5	88.8	30.9082	2	157	101.5	55.5	5.65	7.14	0.69	1.76	5.17	70.4	6.3	230	0.62	0.62	620	0
1	63	1	1	0	0	0	149	57.7	25.9898	1	140	83.5	56.5	5.28	4.18	0.93	1.53	2.19	52.5	3.1	212	0.53	0.62	575	0
1	63	1	1	0	0	0	150	76.4	33.9556	2	122.5	81	41.5	5.7	4.27	2.52	0.76	2.26	60.7	4.7	394	0.53	0.62	575	0
1	63	1	1	0	0	0	151	60.1	26.3585	1	156	74	82	5.73	3.87	1.53	1.01	2.34	56.6	3.5	301	0.45	0.62	535	0
1	63	1	1	0	0	0	152	64	27.7008	1	161.5	96	65.5	5.36	5.24	2.2	1.07	3.39	51.2	5.1	294	0.669	0.601	635	0
1	63	1	0	0	0	0	156.5	71	28.9888	2	100.5	65.5	35	4.53	2.63	1.29	1.16	0.9	62.4	6.3	233	0.595	0.599	597	0
1	63	1	0	0	0	0	154.5	53	22.2034	0	136	74	62	5.71	3.46	0.68	1.32	1.77	56.1	4.6	257	0.73	0.59	660	0
1	63	1	1	0	0	0	159	89.5	35.4021	2	136	85	51	5.51	7.16	1.85	0.82	5.63	59.3	4.4	342	0.584	0.581	582.5	0
1	63	1	1	0	0	0	142.2	57	28.1887	2	160	84.5	75.5	5.66	4.52	0.6	2.03	1.53	76.2	4.5	412	0.769	0.578	673.5	0
1	63	1	1	0	0	0	152.5	59.6	25.6275	1	156	89	67	5.48	6.24	2.37	0.99	4.21	69.4	3.2	230	0.71	0.56	635	0
1	63	1	0	0	0	0	149.5	50.7	22.6843	0	125	74	51	5.26	5.7	1.24	1.46	3.75	53.4	5.2	265	0.64	0.56	600	0
1	63	1	0	0	0	0	158.5	69.3	27.5851	1	121	74	47	5.77	5.39	1.04	1.23	3.65	125.2	6.2	300	0.59	0.543	566.5	0
1	63	1	1	0	0	0	151.5	70.2	30.5852	2	124.5	72	52.5	5.39	6.15	1.21	1.6	4.13	60	7	238	0.62	0.54	580	0
1	63	1	1	0	0	0	152	61.6	26.662	1	166.5	74	92.5	6.56	5.34	0.96	1.73	3.29	53.6	5.3	246	0.54	0.54	540	0
1	63	1	1	0	0	0	156	48.6	19.9704	0	152	87	65	6.45	4.77	2.04	1.41	2.52	61	4.9	204	0.53	0.54	535	0
1	63	1	1	0	0	0	157	70.9	28.7638	2	154.5	91	63.5	5.65	6.03	1.94	1.27	3.93	63.6	5.6	225	0.53	0.54	535	0
1	63	1	0	0	0	0	157.5	61.3	24.7115	1	131	76	55	5.19	4.49	0.84	1.24	3.64	56.6	4.8	171	0.44	0.54	490	0
1	63	1	1	0	0	0	146	62.7	29.4145	2	148	87.5	60.5	5.57	6.03	1.49	1.42	4.14	58.6	5.9	289	0.47	0.53	500	0
1	63	1	1	0	0	0	159	71.7	28.3612	2	146	83.5	62.5	6.59	5.54	2.7	1.08	3.39	58.4	5.8	420	0.463	0.487	475	0
1	63	1	1	0	0	0	156	57.6	23.6686	0	152.5	70	82.5	5.28	3.88	1.18	1.07	2.25	57.1	5.9	237	0.71	0.47	590	0
1	63	1	1	0	0	0	145.5	51.5	24.3266	1	161.5	88	73.5	5.61	4.45	0.89	1.32	2.76	52.8	4.2	157	0.71	0.47	590	0
1	63	1	1	0	0	0	152	56.5	24.4546	1	152	89.5	62.5	5.26	4.77	1.83	1.2	2.86	71	5.1	390	0.46	0.46	460	0
1	63	1	1	0	0	0	149.5	66.9	29.9326	2	146	75	71	5.72	5.9	0.98	2.02	3.31	66	4	301	0.2	0.44	320	0
1	63	1	0	0	0	0	151	69.1	30.3057	2	131	73	58	5.31	6.81	1.54	0.93	5.38	59.5	3.8	242	0.419	0.439	429	0
1	63	1	1	0	0	0	165	50	18.3655	0	148	85.5	62.5	6.16	5.01	1.1	1.53	3.06	75.3	6.2	249	0.453	0.436	444.5	0
0	63	1	1	1	0	0	170	66.3	22.9412	0	142	79	63	6.84	3.21	0.73	1.27	1.42	67.3	5.8	163	0.79	0.71	750	0
0	63	1	1	1	0	1	175	88.2	28.8	2	184	95	89	8.52	5.77	1.19	1.67	3.94	73.7	7.8	330	0.77	0.66	715	0
1	63	1	1	1	0	0	159	71.7	28.3612	2	182	65	117	5.31	6.49	16.35	0.5	1.2	61.8	6.1	431	0.927	1.018	972.5	1
1	63	1	1	1	0	0	152.5	71.8	30.8734	2	162.5	77	85.5	6.95	5.84	1.44	1.35	3.87	55.2	4.6	259	1.077	0.767	922	1
1	63	1	1	1	0	0	159	78.3	30.9719	2	161	82.5	78.5	5.65	6.4	1.51	1.44	4.07	67.8	4.4	278	0.71	0.97	840	0
1	63	1	0	1	0	0	152.5	57.5	24.7245	1	113.5	62.5	51	6.64	4.34	1.38	1.19	2.65	44.5	3.9	196	0.49	0.92	705	0
1	63	1	1	1	0	0	162.5	79.2	29.9929	2	115.5	74.5	41	9.69	7.44	2.36	0.9	5.71	58.3	6.8	345	0.88	0.89	885	0
1	63	1	1	1	0	0	159	62.6	24.7617	1	192.5	92	100.5	7.19	4.79	1.52	1.09	3.69	51.5	4.2	242	0.809	0.817	813	0
1	63	1	0	1	0	0	157.5	62.3	25.1146	1	126	73.5	52.5	7.74	6.07	1.79	1.37	4.02	66.1	5.8	338	0.86	0.8	830	0
1	63	1	1	1	0	0	156.5	62.5	25.5183	1	160.5	96	64.5	14.68	6.37	1.13	1.98	4.21	53.3	5.2	195	0.89	0.79	840	0
1	63	1	0	1	0	0	160	86	33.5937	2	139	82.5	56.5	6.29	4.48	1.56	1.12	2.66	78.9	4.7	300	0.79	0.79	790	0
1	63	1	1	1	0	0	152	75.1	32.5052	2	159	86	73	6.05	6.05	1.13	1.47	4.17	56.5	5.8	295	0.659	0.784	721.5	0
1	63	1	1	1	0	1	151	80.9	35.4809	2	128.5	75	53.5	4.35	5.04	1.76	1.33	2.95	65.7	5.4	257	0.792	0.777	784.5	0
1	63	1	1	1	0	0	162.5	78.2	29.6142	2	167	81	86	6.78	4.81	2.44	1.14	2.7	69.3	5.2	245	0.655	0.754	704.5	0
1	63	1	1	1	0	0	164	82.9	30.8224	2	144.5	74.5	70	5.25	3.6	2.56	0.64	1.6	47.6	5.7	183	0.67	0.73	700	0
1	63	1	1	1	0	0	147.5	60.4	27.7621	1	165.5	82.5	83	7.93	3.75	1.21	1.18	2.12	55.8	6.2	249	0.62	0.73	675	0
1	63	1	1	1	0	0	162.5	72	27.2663	1	176.5	99.5	77	5.43	6.52	1.43	2.17	3.91	65.7	5.2	330	0.71	0.71	710	0
1	63	1	1	1	0	0	154	61.7	26.0162	1	148	76	72	6.85	5.67	2.39	1.25	3.4	80.4	5	229	0.53	0.71	620	0
1	63	1	1	1	0	0	155.5	68.7	28.4116	2	168.5	93	75.5	12.08	4.89	2.02	1.63	2.64	95.9	6.3	300	0.774	0.707	740.5	0
1	63	1	1	1	0	0	152	48.4	20.9488	0	152	75.5	76.5	7.17	4.18	0.99	1.58	2.36	75	4.6	206	0.584	0.684	634	0
1	63	1	1	1	0	0	160.5	68.9	26.7466	1	187	88	99	5.31	3.99	1.4	1.11	2.08	74.4	5.4	359	0.987	0.671	829	0
1	63	1	1	1	0	0	156.5	72.1	29.4379	2	137	79	58	5.95	5.15	1.34	1.23	3.22	72	6.4	363	0.893	0.636	764.5	0
1	63	1	1	1	0	0	147.5	57.5	26.4292	1	197.5	85.5	112	5.15	6.18	0.59	2.38	3.66	54.5	6.1	257	0.705	0.632	668.5	0
1	63	1	0	1	0	0	156.5	55.2	22.5377	0	117	69.5	47.5	7.19	6	2.31	1.16	4.13	70.5	3.9	266	0.71	0.62	665	0
1	63	1	1	1	0	0	146	46.4	21.7677	0	175.5	93.5	82	6.96	4.93	0.83	2.01	2.68	59.1	5	186	0.734	0.569	651.5	0
1	63	1	0	1	0	0	144	54.5	26.2828	1	132	71.5	60.5	9.41	5.81	1.03	1.32	4.07	49.1	4.1	161	0.66	0.56	610	0
1	63	1	1	1	0	0	159.5	58.8	23.113	0	150	78	72	7.29	5.14	1.42	1.34	3.4	61.6	4.1	161	0.44	0.56	500	0
1	63	1	1	1	0	0	152	77.5	33.544	2	156.5	86	70.5	11.56	5.28	2.49	1.7	2.76	48.6	3.6	220	0.59	0.53	560	0
1	63	1	0	1	0	0	149.5	63.2	28.2771	2	134.5	89	45.5	7.34	5.29	1.9	1.16	3.33	65.7	3.2	291	0.54	0.53	535	0
1	63	1	1	1	0	0	152	77.4	33.5007	2	147	73	74	8.28	5.9	1.29	1.73	3.49	51.5	2.6	144	0.587	0.508	547.5	0
1	63	1	1	1	0	0	151	68.5	30.0425	2	158	86.5	71.5	8.05	4.75	0.99	1.13	3.14	44.7	3.5	166	0.6	0.46	530	0
1	63	1	1	1	0	0	155	71	29.5525	2	174.5	102.5	72	12.92	3.56	1.92	0.85	1.82	40.6	4.6	228	0.88	0.33	605	0
0	62	1	1	0	1	1	173.5	71.9	23.8853	0	149	90	59	6.09	6.22	1.19	1.43	4.33	83.7	6.3	347	1.23	1.1	1165	1
0	62	1	0	0	1	1	154	55.4	23.3598	0	128.5	74.5	54	5.21	5.44	1.18	1.49	3.5	77.2	3.9	258	1.075	1.069	1072	1
0	62	1	1	0	1	1	172.5	80.3	26.9859	1	138.5	93.5	45	6.68	5.58	1.28	1.73	3.49	70.3	7.6	326	0.73	1.06	895	1
0	62	1	1	0	1	0	164	81.1	30.1532	2	149	75	74	6.11	5.92	1.72	1.05	4.03	98.8	5.5	356	0.71	1.01	860	1
0	62	1	0	0	1	1	168.5	73.9	26.0282	1	132	71	61	5.63	5.31	0.96	1.23	3.66	86.3	8.5	238	1.06	0.89	975	1
0	62	1	1	0	1	0	177.5	92.3	29.2958	2	163	99.5	63.5	4.7	4.56	2.15	1.06	2.61	74.6	7.1	350	1.07	0.8	935	1
0	62	1	0	0	1	1	158	59.3	23.7542	0	133.5	78	55.5	4.45	5.68	0.76	1.3	3.99	74.7	9	162	1.07	0.64	855	1
0	62	1	1	0	1	1	162	60.2	22.9386	0	149	93	56	5.25	5.63	1.59	1.65	3.57	89.9	8	275	0.97	0.97	970	0
0	62	1	1	0	1	1	168	89	31.5334	2	144	86.5	57.5	6.2	4.46	1.8	1.03	2.75	80.5	4.2	314	0.79	0.89	840	0
0	62	1	0	0	1	1	164.5	62.9	23.2444	0	129	81	48	5.32	4.1	1.29	1.14	2.38	81.2	4.8	394	0.73	0.89	810	0
0	62	1	1	0	1	0	165	54.5	20.0184	0	182	109	73	5.06	5.26	0.66	1.7	3.3	105.5	7.7	327	0.823	0.87	846.5	0
0	62	1	1	0	1	1	172	78.1	26.3994	1	148	84.5	63.5	5.39	4.18	0.76	1.5	2.38	78	4.2	592	0.88	0.8	840	0
0	62	1	1	0	1	1	177.5	60.7	19.266	0	176	96.5	79.5	5.37	4.94	0.88	1.6	2.86	48.3	6	328	0.71	0.8	755	0
0	62	1	0	0	1	1	164	67.7	25.171	1	131	70	61	5.74	4.12	1.06	1.05	2.6	86.3	6.7	351	0.71	0.8	755	0
0	62	1	0	0	1	0	166	68	24.677	1	120	78	42	5.62	5.37	2.07	1.02	3.43	78	4.6	322	0.64	0.8	720	0
0	62	1	1	0	1	1	169.5	86.4	30.0728	2	154	96.5	57.5	5.6	5.57	1.3	1.17	3.91	88	5.7	472	0.53	0.8	665	0
0	62	1	1	0	1	0	165.5	80.1	29.244	2	132.5	85	47.5	4.63	5.16	1.99	0.97	3.51	84.3	3.6	350	0.768	0.799	783.5	0
0	62	1	1	0	1	0	165	72.6	26.6667	1	163	97.5	65.5	6.41	5.55	1.42	1.19	3.96	90.8	5.7	302	0.97	0.79	880	0
0	62	1	1	0	1	1	169.5	58.5	20.3618	0	178	96	82	4.92	4.56	0.61	1.8	2.72	69.7	6.9	345	0.71	0.79	750	0
0	62	1	1	0	1	0	172.5	65.5	22.0122	0	160	99	61	5.18	4.14	0.52	1.84	2.2	75	3.7	228	0.652	0.786	719	0
0	62	1	0	0	1	1	166	66.1	23.9875	0	131	84.5	46.5	4.63	3.98	1.13	1.49	1.99	92.6	5.6	339	0.705	0.783	744	0
0	62	1	1	0	1	1	162	64.7	24.6533	1	151	94	57	4.67	4.51	0.89	1.56	2.61	78.2	6.8	291	0.919	0.772	845.5	0
0	62	1	1	0	1	1	164.5	74.7	27.6051	1	172.5	91	81.5	4.39	4.24	1.05	1.59	2.2	75.3	4.5	368	0.666	0.759	712.5	0
0	62	1	1	0	1	1	169.5	78	27.1491	1	197.5	104	93.5	5.89	4.23	0.61	1.86	2.05	61.6	4.9	240	0.762	0.754	758	0
0	62	1	1	0	1	1	172.5	90.7	30.481	2	142	87	55	5.58	5.77	1.36	1.58	3.74	68.3	5.9	417	0.595	0.75	672.5	0
0	62	1	1	0	1	1	160.5	59.3	23.02	0	156.5	88	68.5	5.68	4.66	1.01	2.07	2.46	82.1	4.5	471	0.92	0.71	815	0
0	62	1	1	0	1	0	163	75.4	28.3789	2	175.5	116	59.5	5.92	4.52	1.83	0.9	3.22	83.4	4.7	398	0.89	0.71	800	0
0	62	1	1	0	1	1	160.5	79.8	30.978	2	191	87.5	103.5	5.21	4.48	1.4	1.06	2.92	81.4	4.7	429	0.81	0.71	760	0
0	62	1	0	0	1	1	169.5	61.3	21.3364	0	133.5	81.5	52	5.41	4.86	0.66	1.79	2.63	84.2	5.3	327	0.71	0.71	710	0
0	62	1	1	0	1	1	174.5	82.1	26.962	1	174.5	112	62.5	6.95	4.87	1.79	1.21	3.09	132	6.4	352	0.71	0.71	710	0
0	62	1	0	0	1	1	166	61.3	22.2456	0	130.5	82.5	48	4.62	5.62	1	1.77	3.55	85.4	7.1	269	0.64	0.71	675	0
0	62	1	1	0	1	1	170.5	69.3	23.8388	0	166.5	92.5	74	5.82	5.38	0.93	1.8	3.31	82.4	5.2	312	0.62	0.71	665	0
0	62	1	1	0	1	1	163.5	82.8	30.9738	2	143.5	82	61.5	6.88	4.8	1.96	1.12	3	79.8	7.3	380	0.79	0.7	745	0
0	62	1	0	0	1	1	163.5	65.6	24.5396	1	122	77	45	5.65	4.96	2.17	0.99	2.96	71.1	3.9	261	0.771	0.671	721	0
0	62	1	0	0	1	1	175.5	67.1	21.7855	0	129	86	43	4.69	3.25	1.07	1.35	1.41	65.8	3.4	272	0.655	0.667	661	0
0	62	1	1	0	1	1	165	94.4	34.674	2	181	84	97	5.55	3.8	0.65	1.23	2.17	63.4	6.2	244	0.89	0.66	775	0
[truncated: 1,281 more rows]
