# Supplementary material for: Uric acid to HDL cholesterol ratio as a novel predictor of carotid intima-media thickness: a cross-sectional study in rural China
Source: PeerJ. 2025 Sep 19;13:e20053. doi: 10.7717/peerj.20053 (PMC12452943; doi:10.7717/peerj.20053)
Supplement: Supplemental Information 5 [file peerj-13-20053-s005.xlsx]

## Sheet: Sheet1
items
sex	0=male,1=female
age group	0=＜60,1=61-69,2=≥70
Hypertension	0=no,1=yes
Diabetic	0=no,1=yes
Smoking	0=no,1=yes
Drinking	0=no,1=yes
BMI group	0=＜24,1=24-28,2=≥28
cIMT group	0=≤1mm,1=＞1mm
